# Supplementary material
Source: Royal Society of Chemistry journal article supplement (doi:10.1039/d6cc02357f)

## *Supporting Information for*

# **Copper-Mediated Arylation of Thioethers with Boronic Acids**

Ao Wen, Baobao Su, Siyuan Wang, Tianle Yan, Huachen Lin, Zhibin Luo, and Bin Liu\*

*School of Chemistry and Chemical Engineering, Jiangsu University, Zhenjiang, 212013, China*

*E-mail: [liub@ujs.edu.cn](mailto:liub@ujs.edu.cn)*

### **CONTENTS**

|                                                                                                  |     |
|--------------------------------------------------------------------------------------------------|-----|
| 1. General Information                                                                           | S2  |
| 2. Optimization of the Reaction Conditions                                                       | S3  |
| 3. Procedures for preparation of substrates                                                      | S3  |
| 4. Procedures for preparation of aryl sulfonium salts                                            | S15 |
| 5. UV absorption and Thermogravimetric analysis of <b>3a</b> , <b>3d</b> , <b>3e</b> , <b>3t</b> | S30 |
| 6. Proposed mechanism                                                                            | S32 |
| 7. References                                                                                    | S32 |
| 8. NMR Spectra                                                                                   | S33 |

**1. General information:** Unless otherwise noted, all reagents were purchased from commercial suppliers and used without further purification. All reactions were carried out in flame-dried glassware under air unless otherwise noted. NMR spectra were recorded on Bruker-400 spectrometers. Chemical shifts ( $\delta$ ) are given in ppm relative to TMS. The residual solvent signals were used as references and the chemical shifts were converted to the TMS scale ( $\text{CHCl}_3$ :  $\delta$  7.26 for proton and  $\delta$  77.16 for carbon). Multiplicities were given as: s (singlet); d (doublet); dd (doublet of doublets); t (triplet); Coupling constants are reported as a J value in Hz. High-resolution mass spectral analysis (HRMS) was performed on Waters XEVO G2 Q-TOF. Thermogravimetric analyses (TGA) were carried out on NETZSCH TG 209 thermal gravimetric analyzer (NETZSCH, Selb, Germany). UV absorption spectra were measured using a Hitachi UH5300 double-beam UV-vis spectrophotometer. The heat source used for the reaction is an oil bath. Column chromatography was performed on 300-400 mesh silica gel using petroleum ether-ethyl acetate or dichloromethane-methanol gradient system. TLC visualization was carried out using UV light (254 nm and 366 nm) where applicable, and otherwise by iodine vapor staining.

## 2. Optimization of the Reaction Conditions

| Entry | Deviation from standard conditions                                   | <b>3a</b> (%) <sup>a</sup> |
|-------|----------------------------------------------------------------------|----------------------------|
| 1     | none                                                                 | 94                         |
| 2     | In HFIP                                                              | 57(87)                     |
| 3     | In MeOH                                                              | 21                         |
| 4     | In DCE                                                               | 80                         |
| 5     | In THF                                                               | 67                         |
| 6     | In toluene                                                           | 52                         |
| 7     | In MeCN                                                              | <15                        |
| 8     | In DMSO                                                              | <15                        |
| 9     | In DMF                                                               | <15                        |
| 10    | Under argon atmosphere                                               | 72                         |
| 11    | <b>1a</b> (1.5 equiv) with <b>2a</b> (1 equiv)                       | 83                         |
| 12    | <b>1a</b> (1 equiv) with <b>2a</b> (2 equiv)                         | 76                         |
| 13    | Cu(OTf) <sub>2</sub> (1.5 equiv)                                     | 91                         |
| 14    | Cu(OAc) <sub>2</sub> instead of Cu(OTf) <sub>2</sub>                 | 31                         |
| 15    | CuSO <sub>4</sub> ·5H <sub>2</sub> O instead of Cu(OTf) <sub>2</sub> | 30                         |
| 16    | CuBr <sub>2</sub> instead of Cu(OTf) <sub>2</sub>                    | <15                        |
| 17    | CuCl <sub>2</sub> instead of Cu(OTf) <sub>2</sub>                    | <15                        |
| 18    | Cu(OTf) <sub>2</sub> (10 mol%) with NFSI (1.5 equiv)                 | <15                        |
| 19    | Cu(OTf) <sub>2</sub> (10 mol%) with PIDA (1.5 equiv)                 | <15                        |
| 20    | Cu(OTf) <sub>2</sub> (10 mol%) with selectfluor (1.5 equiv)          | <15                        |
| 21    | Cu(OTf) <sub>2</sub> (10 mol%) with LPO (1.5 equiv)                  | <15                        |

<sup>a</sup>The reaction of **1a** (0.6 mmol), **2a** (0.3 mmol), and Cu(OTf)<sub>2</sub> (0.6 mmol) was carried out in trifluoroethanol (1 mL) at 60 °C for 4h under air unless otherwise noted.

## 3. Procedures for preparation of substrates

Most of the boronic acids (**2a-2o**) were commercially available and used directly without further purification. Boronic acid **2ai** was prepared according to the known procedure.<sup>1</sup>

**Substrates 1p - 1z** were prepared analogously to **1a**:

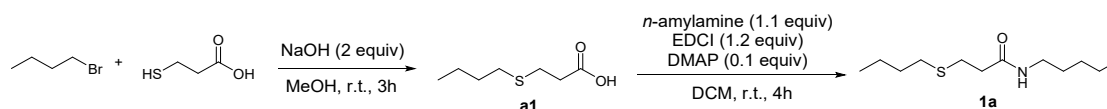

**Step 1:** To a solution of 1-bromobutane (2.6 g, 18.8 mmol, 1.0 equiv) and 3-mercaptopropanoic acid (2.0 g, 18.8 mmol, 1.0 equiv) (2-mercaptoacetic acid was used for substrates **3t**, **3u**, **3v**) in MeOH (15 mL) was added NaOH (1.5 g, 37.6 mmol, 2.0 equiv) at 0 °C. The resulting mixture was allowed to warm to room temperature and stirred for 3 h. After completion of the reaction as monitored by TLC, the mixture was concentrated under reduced pressure. The residue was acidified with 1 M aqueous HCl and extracted with DCM (3 × 20 mL). The combined organic layers were dried over anhydrous Na<sub>2</sub>SO<sub>4</sub>, filtered, and concentrated under reduced pressure. The crude product was purified by silica gel column chromatography (300 - 400 mesh, eluting with DCM/MeOH = 20 : 1) to afford compound **a1** (2.0 g, 67% yield).

**Step 2:** To a stirred solution of compound **a1** (1.62 g, 10.0 mmol, 1.0 equiv) in DCM (15 mL) were added EDCI (2.30 g, 12.0 mmol, 1.2 equiv) and DMAP (122 mg, 1.0 mmol, 0.1 equiv) at 0 °C. Subsequently, a solution of *n*-amylamine (0.96 g, 11.0 mmol, 1.1 equiv) in DCM (2 mL) was added dropwise. The reaction mixture was allowed to warm to room temperature and stirred for 4 h. Upon completion as monitored by TLC, the reaction mixture was diluted with DCM (30 mL) and washed sequentially with 1 M aqueous HCl (3 × 20 mL) and brine (20 mL). The organic layer was dried over anhydrous Na<sub>2</sub>SO<sub>4</sub>, filtered, and concentrated under reduced pressure. The residue was purified by silica gel column chromatography (300 - 400 mesh, eluting with PE/EtOAc = 2 : 1) to afford the product **1a** (1.98 g, 86% yield).

**3-(butylthio)-N-pentylpropanamide (1a):**

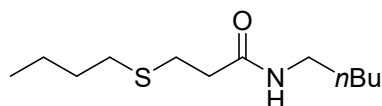

Colorless oily liquid. PE/EtOAc = 2 : 1, R<sub>f</sub> = 0.5. Yield: 93% (2.15 g scale); <sup>1</sup>H NMR (400 MHz, CDCl<sub>3</sub>) δ 6.12 (s, 1H), 3.23 – 3.12 (m, 2H), 2.74 (t, *J* = 7.3 Hz, 2H), 2.51 – 2.44 (m, 2H), 2.39 (t, *J* = 7.3 Hz, 2H), 1.55 – 1.41 (m, 4H), 1.39 – 1.30 (m, 2H), 1.29 – 1.18 (m, 4H), 0.89 – 0.79 (m, 6H).; <sup>13</sup>C NMR (101 MHz, CDCl<sub>3</sub>) δ 171.3, 39.6, 36.9, 32.1, 31.7, 29.3, 29.1, 28.0, 22.4, 22.0, 14.0, 13.7.; HRMS (ESI) *m/z* : (M+H)<sup>+</sup> Calc. for: C<sub>12</sub>H<sub>26</sub>NOS<sup>+</sup>, 232.1730. Found. 232.1733.

**3-(butylthio)-N,N-diethylpropanamide (1p):**

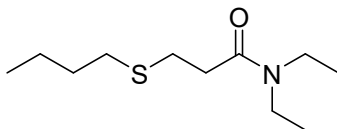

Yellow oily liquid. PE/EtOAc = 2 : 1, R<sub>f</sub> = 0.8. Yield: 77% (1.66 g scale); <sup>1</sup>H NMR (400 MHz, CDCl<sub>3</sub>) δ 3.33 – 3.17 (m, 4H), 2.78 – 2.68 (m, 2H), 2.54 – 2.40 (m, 4H), 1.55 – 1.42 (m, 2H), 1.38 – 1.23 (m, 2H), 1.13 – 0.98 (m, 6H), 0.81 (t, *J* = 7.3 Hz, 3H).; <sup>13</sup>C NMR (101 MHz, CDCl<sub>3</sub>) δ 170.3, 41.8, 40.1, 33.6, 32.1, 31.7, 27.6, 21.9, 14.2, 13.6, 13.0.; HRMS (ESI) *m/z* : (M+H)<sup>+</sup> Calc. for: C<sub>11</sub>H<sub>24</sub>NOS<sup>+</sup>, 218.1573. Found. 218.1579.

**3-(butylthio)-1-(piperidin-1-yl)propan-1-one (1q):**

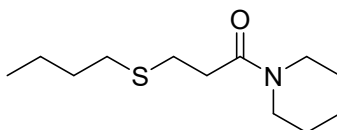

Colorless oily liquid. PE/EtOAc = 2 : 1, R<sub>f</sub> = 0.7. Yield: 90% (1.27 g scale); <sup>1</sup>H NMR (400 MHz, CDCl<sub>3</sub>) δ 3.51 – 3.43 (m, 2H), 3.36 – 3.29 (m, 2H), 2.77 – 2.70 (m, 2H), 2.56 – 2.50 (m, 2H), 2.49 – 2.43 (m, 2H), 1.61 – 1.54 (m, 2H), 1.54 – 1.42 (m, 6H), 1.38 – 1.28 (m, 2H), 0.84 (t, *J* = 7.4 Hz, 3H).; <sup>13</sup>C NMR (101 MHz, CDCl<sub>3</sub>) δ 169.4, 46.5, 42.7, 33.7, 32.1, 31.7, 27.6, 26.4, 25.5, 24.5, 21.9, 13.7.; HRMS (ESI) *m/z* : (M+H)<sup>+</sup> Calc. for: C<sub>12</sub>H<sub>24</sub>NOS<sup>+</sup>, 230.1573. Found. 230.1580.

**N-(tert-butyl)-3-(butylthio)propanamide (1r):**

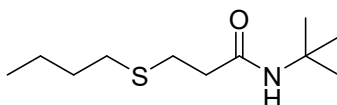

Colorless oily liquid. PE/EtOAc = 2 : 1, R<sub>f</sub> = 0.7. Yield: 71% (0.95 g scale); <sup>1</sup>H NMR (400 MHz, CDCl<sub>3</sub>) δ 2.77 – 2.72 (m, 2H), 2.53 – 2.47 (m, 2H), 2.36 – 2.30 (m, 2H), 1.58 – 1.49 (m, 2H), 1.41 – 1.33 (m, 2H), 1.32 (s, 9H), 0.87 (t, *J* = 7.3 Hz, 3H).; <sup>13</sup>C NMR (101 MHz, CDCl<sub>3</sub>) δ 170.7, 51.4, 37.9, 32.2, 31.8, 28.9, 27.9, 22.0, 13.7.; HRMS (ESI) *m/z* : (M+H)<sup>+</sup> Calc. for: C<sub>11</sub>H<sub>24</sub>NOS<sup>+</sup>, 218.1573. Found. 218.1580.

**3-(butylthio)-N-methoxy-N-methylpropanamide (1s):**

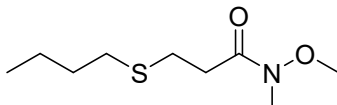

Colorless oily liquid. PE/EtOAc = 2 : 1, R<sub>f</sub> = 0.6. Yield: 86% (1.23 g scale); <sup>1</sup>H NMR (400 MHz, CDCl<sub>3</sub>) δ 3.66 (s, 3H), 3.15 (s, 3H), 2.79 – 2.74 (m, 2H), 2.72 – 2.64 (m, 2H), 2.53 – 2.48 (m, 2H), 1.58 – 1.49 (m, 2H), 1.42 – 1.31 (m, 2H), 0.87 (t, *J* = 7.3 Hz, 3H).; <sup>13</sup>C NMR (101 MHz, CDCl<sub>3</sub>) δ 172.8, 61.3, 32.6, 32.1, 31.7, 26.9, 22.0, 13.7.; HRMS (ESI) *m/z* : (M+H)<sup>+</sup> Calc. for: C<sub>9</sub>H<sub>20</sub>NO<sub>2</sub>S<sup>+</sup>, 206.1209. Found. 206.1213.

**2-(butylthio)-N-pentylacetamide(1t):**

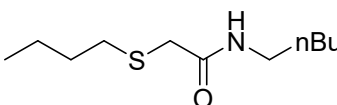

colorless oily liquid. PE/EtOAc = 2 : 1, R<sub>f</sub> = 0.6. Yield: 88% (1.29 g scale); <sup>1</sup>H NMR (400 MHz, CDCl<sub>3</sub>) δ 6.95 (s, 1H), 3.23 – 3.17 (m, 2H), 3.12 (s, 2H), 2.49 – 2.42 (m, 2H), 1.53 – 1.41

(m, 4H), 1.37 – 1.28 (m, 2H), 1.28 – 1.20 (m, 4H), 0.87 – 0.79 (m, 6H).  $^{13}\text{C}$  NMR (101 MHz,  $\text{CDCl}_3$ )  $\delta$  168.7, 39.7, 36.2, 32.8, 31.2, 29.2, 29.0, 22.3, 21.8, 13.9, 13.5. HRMS (ESI)  $m/z$  :  $(\text{M}+\text{H})^+$  Calc. for:  $\text{C}_{11}\text{H}_{24}\text{NOS}^+$ , 218.1573. Found. 218.1571.

**2-(butylthio)-N-phenylacetamide (1u):**

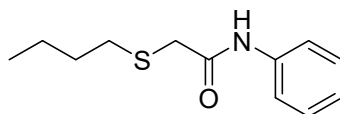

Yellow oily liquid. PE/EtOAc = 2 : 1,  $R_f$  = 0.6. Yield: 91% (1.38 g scale);  $^1\text{H}$  NMR (400 MHz,  $\text{CDCl}_3$ )  $\delta$  8.82 (s, 1H), 7.63 – 7.49 (m, 2H), 7.38 – 7.27 (m, 2H), 7.17 – 7.07 (m, 1H), 3.34 (s, 2H), 2.65 – 2.54 (m, 2H), 1.68 – 1.53 (m, 2H), 1.49 – 1.32 (m, 2H), 0.90 (t,  $J$  = 7.3 Hz, 3H).  $^{13}\text{C}$  NMR (101 MHz,  $\text{CDCl}_3$ )  $\delta$  167.3, 137.6, 129.1, 124.6, 119.8, 37.1, 32.9, 31.2, 21.9, 13.6.; HRMS (ESI)  $m/z$  :  $(\text{M}+\text{H})^+$  Calc. for:  $\text{C}_{12}\text{H}_{18}\text{NOS}^+$ , 224.1104. Found. 224.1106.

**2-(butylthio)-N-methoxy-N-methylacetamide (1v):**

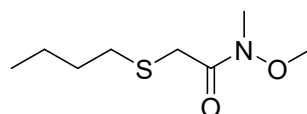

Colorless oily liquid. PE/EtOAc = 2 : 1,  $R_f$  = 0.6. Yield: 73% (0.97 g scale);  $^1\text{H}$  NMR (400 MHz,  $\text{CDCl}_3$ )  $\delta$  3.68 (s, 3H), 3.28 (s, 2H), 3.13 (s, 3H), 2.63 – 2.55 (m, 2H), 1.57 – 1.46 (m, 2H), 1.39 – 1.28 (m, 2H), 0.84 (t,  $J$  = 7.3 Hz, 3H).  $^{13}\text{C}$  NMR (101 MHz,  $\text{CDCl}_3$ )  $\delta$  171.1, 61.4, 32.2, 32.1, 31.6, 31.2, 21.8, 13.6.; HRMS (ESI)  $m/z$  :  $(\text{M}+\text{H})^+$  Calc. for:  $\text{C}_8\text{H}_{18}\text{NO}_2\text{S}^+$ , 192.1053. Found. 192.1054.

**3-(cyclopentylthio)-N-pentylpropanamide (1w):**

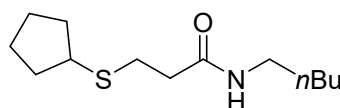

Colorless oily liquid. PE/EtOAc = 2 : 1,  $R_f$  = 0.5. Yield: 91% (1.27 g scale);  $^1\text{H}$  NMR (400 MHz,  $\text{CDCl}_3$ )  $\delta$  6.04 (s, 1H), 3.25 – 3.14 (m, 2H), 3.12 – 3.00 (m, 1H), 2.83 – 2.74 (m, 2H), 2.46 – 2.36 (m, 2H), 2.03 – 1.87 (m, 2H), 1.78 – 1.61 (m, 2H), 1.58 – 1.37 (m, 6H), 1.32 – 1.20 (m, 4H), 0.84 (t,  $J$  = 6.9 Hz, 3H).  $^{13}\text{C}$  NMR (101 MHz,  $\text{CDCl}_3$ )  $\delta$  171.4, 44.1, 39.6, 36.9, 33.8, 29.3, 29.1, 27.7, 24.8, 22.4, 14.0.; HRMS (ESI)  $m/z$  :  $(\text{M}+\text{H})^+$  Calc. for:  $\text{C}_{13}\text{H}_{26}\text{NOS}^+$ , 244.1730. Found. 244.1733.

**3-((3-methoxypropyl)thio)-N-pentylpropanamide (1x):**

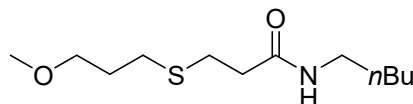

Colorless oily liquid. PE/EtOAc = 2 : 1,  $R_f$  = 0.2. Yield: 94% (1.30 g scale);  $^1\text{H}$  NMR (400 MHz,  $\text{CDCl}_3$ )  $\delta$  6.20 (s, 1H), 3.37 (t,  $J$  = 6.1 Hz, 2H), 3.24 (s, 3H), 3.15 (dd,  $J$  = 13.0, 7.1 Hz, 2H), 2.72 (t,  $J$  = 7.3 Hz, 2H), 2.53 (t,  $J$  = 7.3 Hz, 2H), 2.37 (t,  $J$  = 7.3 Hz, 2H), 1.82 – 1.68 (m, 2H), 1.47 – 1.35 (m, 2H), 1.28 – 1.16 (m, 4H), 0.81 (t,  $J$  = 6.9 Hz, 3H).  $^{13}\text{C}$  NMR (101 MHz,  $\text{CDCl}_3$ )  $\delta$  171.3, 71.0, 58.5, 39.6, 36.7, 29.5, 29.2, 29.0, 28.8, 27.9, 22.3, 14.0.; HRMS (ESI)  $m/z$  :  $(\text{M}+\text{H})^+$  Calc. for:  $\text{C}_{12}\text{H}_{26}\text{NO}_2\text{S}^+$ , 248.1679. Found. 248.1682.

**ethyl (3-(butylthio)propanoyl)-L-leucinate (1y):**

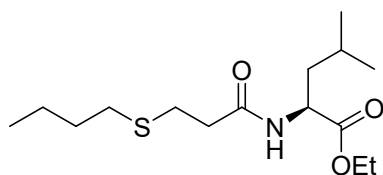

Colorless oily liquid. PE/EtOAc = 2 : 1, R<sub>f</sub> = 0.6. Yield: 81% (1.53 g scale); <sup>1</sup>H NMR (400 MHz, CDCl<sub>3</sub>) δ 6.31 (d, *J* = 8.2 Hz, 1H), 4.61 – 4.53 (m, 1H), 4.18 – 4.08 (m, 2H), 2.79 – 2.71 (m, 2H), 2.51 – 2.41 (m, 4H), 1.69 – 1.55 (m, 2H), 1.55 – 1.44 (m, 3H), 1.39 – 1.29 (m, 2H), 1.25 – 1.19 (m, 3H), 0.92 – 0.82 (m, 9H).; <sup>13</sup>C NMR (126 MHz, CDCl<sub>3</sub>) δ 173.2, 171.1, 61.3, 50.8, 41.7, 36.6, 32.0, 31.7, 27.6, 24.9, 22.8, 22.0, 21.9, 14.2, 13.7.; HRMS (ESI) *m/z* : (M+H)<sup>+</sup> Calc. for: C<sub>15</sub>H<sub>30</sub>NO<sub>3</sub>S<sup>+</sup>, 304.1941. Found. 304.1946.

**diethyl (3-(butylthio)propanoyl)-L-glutamate (1z):**

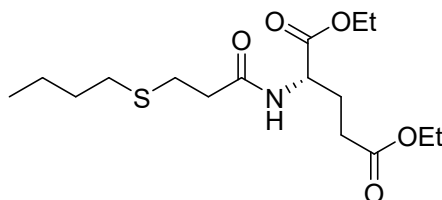

Colorless oily liquid. PE/EtOAc = 2 : 1, R<sub>f</sub> = 0.6. Yield: 67% (1.44 g scale); <sup>1</sup>H NMR (400 MHz, CDCl<sub>3</sub>) δ 6.57 (d, *J* = 7.8 Hz, 1H), 4.59 – 4.49 (m, 1H), 4.18 – 4.10 (m, 2H), 4.09 – 4.02 (m, 2H), 2.77 – 2.69 (m, 2H), 2.52 – 2.40 (m, 4H), 2.39 – 2.24 (m, 2H), 2.17 – 2.08 (m, 1H), 1.98 – 1.87 (m, 1H), 1.55 – 1.45 (m, 2H), 1.38 – 1.28 (m, 2H), 1.25 – 1.15 (m, 6H), 0.87 – 0.80 (m, 3H).; <sup>13</sup>C NMR (101 MHz, CDCl<sub>3</sub>) δ 172.9, 171.9, 171.3, 61.6, 60.7, 51.7, 36.6, 32.0, 31.6, 30.3, 27.6, 27.3, 21.9, 14.2, 14.1, 13.6.; HRMS (ESI) *m/z* : (M+H)<sup>+</sup> Calc. for: C<sub>16</sub>H<sub>30</sub>NO<sub>5</sub>S<sup>+</sup>, 348.1839. Found. 348.1843.

**Substrates 1aa, 1ab were prepared analogously to 1ac:**

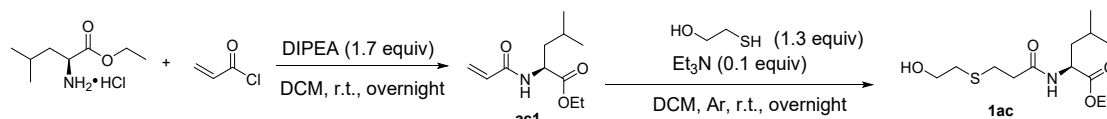

**Step 1:** To a stirred solution of L-leucine ethyl ester hydrochloride (4.30 g, 22.0 mmol, 1.1 equiv) and DIPEA (4.39 g, 34.0 mmol, 1.7 equiv) in DCM (20 mL) was added dropwise acryloyl chloride (1.81 g, 20.0 mmol, 1.0 equiv) at 0 °C. The resulting mixture was allowed to warm to room temperature and stirred overnight. After completion of the reaction as monitored by TLC, the mixture was washed with brine (30 mL), and the aqueous phase was extracted with DCM (3 × 20 mL). The combined organic layers were dried over anhydrous Na<sub>2</sub>SO<sub>4</sub>, filtered, and concentrated under reduced pressure. The residue was purified by silica gel column chromatography (300 - 400 mesh, eluting with PE/EtOAc = 2 : 1) to afford compound **ac1** (3.42 g, 80% yield).

**Step 2:** Under an argon atmosphere, a mixture of compound **ac1** (2.13 g, 10.0 mmol,

1.0 equiv), 2-mercaptoethanol (1.02 g, 13.0 mmol, 1.3 equiv), and Et<sub>3</sub>N (0.10 g, 1.0 mmol, 0.1 equiv) in DCM (15 mL) was stirred at room temperature overnight. After completion of the reaction as monitored by TLC, the mixture was washed with brine (30 mL), and the aqueous phase was extracted with DCM (3 × 20 mL). The combined organic layers were dried over anhydrous Na<sub>2</sub>SO<sub>4</sub>, filtered, and concentrated under reduced pressure. The residue was purified by silica gel column chromatography (300 - 400 mesh, eluting with PE/EtOAc = 1 : 1) to afford compound **1ac** (2.06 g, 71% yield).

**diethyl (3-((2-hydroxyethyl)thio)propanoyl)-L-glutamate (1aa):**

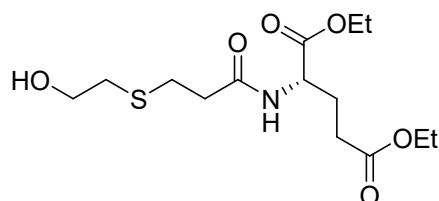

Colorless oily liquid. DCM/MeOH = 20 : 1, R<sub>f</sub> = 0.4. Yield: 69% (4.60 g scale); <sup>1</sup>H NMR (400 MHz, CDCl<sub>3</sub>) δ 7.03 (d, *J* = 7.9 Hz, 1H), 4.46 – 4.37 (m, 1H), 4.06 – 3.99 (m, 2H), 3.99 – 3.92 (m, 2H), 3.64 – 3.54 (m, 3H), 2.71 – 2.65 (m, 2H), 2.58 – 2.52 (m, 2H), 2.42 – 2.35 (m, 2H), 2.30 – 2.20 (m, 2H), 2.06 – 1.97 (m, 1H), 1.85 – 1.76 (m, 1H), 1.14 – 1.06 (m, 6H); <sup>13</sup>C NMR (101 MHz, CDCl<sub>3</sub>) δ 172.6, 171.7, 171.4, 61.3, 60.9, 60.4, 51.5, 36.1, 34.7, 30.1, 27.3, 26.9, 13.9, 13.8.; HRMS (ESI) *m/z* : (M-H)<sup>-</sup> Calc. for: C<sub>14</sub>H<sub>24</sub>NO<sub>6</sub>S<sup>-</sup>, 334.1330. Found. 334.1325.

**3-((2-hydroxyethyl)thio)-1-(indolin-1-yl)propan-1-one (1ab):**

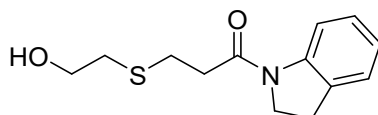

White solid. DCM/MeOH = 20 : 1, R<sub>f</sub> = 0.6. Yield: 63% (1.90 g scale); **Melting point:** 139 – 140 °C ; <sup>1</sup>H NMR (400 MHz, CDCl<sub>3</sub>) δ 8.22 – 8.17 (m, 1H), 7.19 – 7.13 (m, 2H), 7.02 – 6.97 (m, 1H), 4.02 – 3.96 (m, 2H), 3.79 – 3.76 (m, 2H), 3.18 – 3.12 (m, 2H), 2.96 – 2.90 (m, 3H), 2.78 – 2.74 (m, 2H), 2.70 – 2.66 (m, 2H); <sup>13</sup>C NMR (101 MHz, CDCl<sub>3</sub>) δ 169.4, 142.7, 131.2, 127.5, 124.6, 123.8, 117.0, 61.0, 47.9, 36.3, 35.6, 27.9, 26.4.; HRMS (ESI) *m/z* : (M+H)<sup>+</sup> Calc. for: C<sub>13</sub>H<sub>18</sub>NO<sub>2</sub>S<sup>+</sup>, 252.1053. Found. 252.1054.

**ethyl (3-((2-hydroxyethyl)thio)propanoyl)-L-leucinate (1ac):**

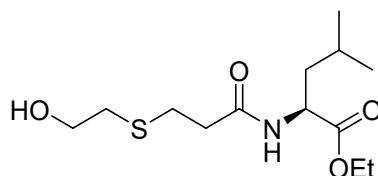

Colorless oily liquid. PE/EtOAc = 2 : 1, R<sub>f</sub> = 0.1. Yield: 71% (2.06 g scale); <sup>1</sup>H NMR (400 MHz, CDCl<sub>3</sub>) δ 6.24 (d, *J* = 8.1 Hz, 1H), 4.65 – 4.58 (m, 1H), 4.22 – 4.13 (m, 2H), 3.78 – 3.70 (m, 2H), 2.90 – 2.80 (m, 3H), 2.75 – 2.70 (m, 2H), 2.55 – 2.48 (m, 2H), 1.71 – 1.59 (m, 2H), 1.57 – 1.48 (m, 1H), 1.27 (t, *J* = 7.1 Hz, 3H), 0.96 – 0.90 (m, 6H); <sup>13</sup>C NMR (101 MHz, CDCl<sub>3</sub>) δ 173.4, 171.1, 61.6, 61.0, 51.0, 41.8, 36.7, 35.6, 27.4, 25.0, 22.9, 22.1, 14.3.; HRMS (ESI) *m/z* : (M-H)<sup>-</sup> Calc. for: C<sub>13</sub>H<sub>24</sub>NO<sub>4</sub>S<sup>-</sup>, 290.1432. Found. 290.1429.

### Preparation of Substrate 1ad:

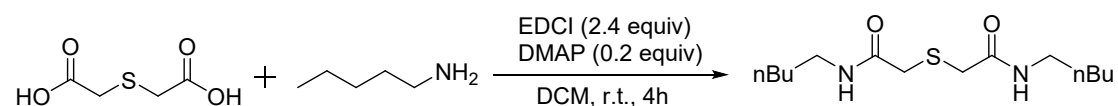

To a stirred solution of thiodiglycolic acid (600.6 mg, 4.0 mmol, 1.0 equiv) in DCM (10 mL) were added EDCI (1.84 g, 9.6 mmol, 2.4 equiv) and DMAP (98.0 mg, 0.8 mmol, 0.2 equiv) at 0 °C. Subsequently, a solution of *n*-amylamine (767.0 mg, 8.8 mmol, 2.2 equiv) in DCM (1 mL) was added dropwise. The reaction mixture was allowed to warm to room temperature and stirred for 4 h. Upon completion as monitored by TLC, the reaction mixture was diluted with DCM (30 mL) and washed sequentially with 1 M aqueous HCl (3 × 20 mL) and brine (20 mL). The organic layer was dried over anhydrous Na<sub>2</sub>SO<sub>4</sub>, filtered, and concentrated under reduced pressure. The residue was purified by silica gel column chromatography (300 - 400 mesh, eluting with DCM/MeOH = 20 : 1) to afford the product **1ad** (1.07 g, 93% yield).

### 2,2'-thiobis(*N*-pentylacetamide) (**1ad**) :

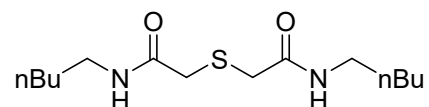

White solid. DCM/MeOH = 20 : 1, R<sub>f</sub> = 0.6. Yield: 93% (1.07 g scale); **Melting point**: 111 – 112 °C.; **<sup>1</sup>H NMR** (400 MHz, CDCl<sub>3</sub>) δ 7.25 – 7.18 (m, 2H), 3.23 – 3.16 (m, 8H), 1.53 – 1.44 (m, 4H), 1.32 – 1.23 (m, 8H), 0.88 – 0.82 (m, 6H). **<sup>13</sup>C NMR** (101 MHz, CDCl<sub>3</sub>) δ 168.9, 40.0, 35.9, 29.2, 29.1, 22.4, 14.0.; **HRMS (ESI)** m/z : (M)<sup>+</sup> Calc. for: C<sub>14</sub>H<sub>29</sub>N<sub>2</sub>O<sub>2</sub>S<sup>+</sup>, 289.1944. Found. 289.1947.

### Substrates 1ae, 1ah were prepared analogously to 1af:

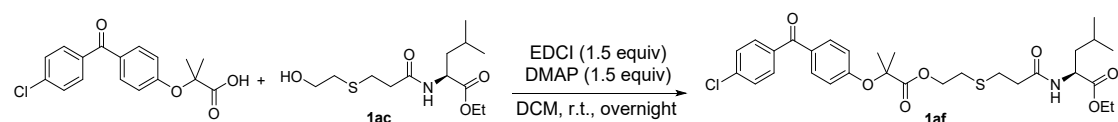

To a stirred solution of fenofibric acid (1.12 g, 3.5 mmol, 1.0 equiv) and compound **1ac** (1.02 g, 3.5 mmol, 1.0 equiv) in DCM (15 mL) at 0 °C were added sequentially EDCI (1.01 g, 5.25 mmol, 1.5 equiv) and DMAP (0.64 g, 5.25 mmol, 1.5 equiv). The ice bath was then removed, and the mixture was allowed to warm to room temperature and stirred overnight. The reaction progress was monitored by TLC until complete

consumption of the starting materials. Upon completion, the reaction was quenched with 1 M aqueous HCl, and the mixture was extracted with DCM (3 × 20 mL). The combined organic layers were dried over anhydrous Na<sub>2</sub>SO<sub>4</sub>, filtered, and concentrated under reduced pressure. The residue was purified by silica gel column chromatography (300 - 400 mesh, PE/EtOAc = 1 : 1) to afford the target compound **1af** (1.9 g, 92% yield).

**diethyl (3-((2-(((benzyloxy)carbonyl)-D-valyl)oxy)ethyl)thio)propanoyl)-L-glutamate (1ae):**

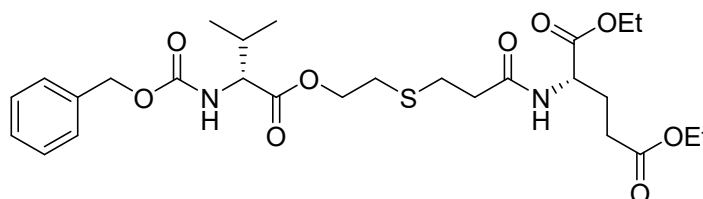

Colorless oily liquid. DCM/MeOH = 50 : 1, R<sub>f</sub> = 0.5. Yield: 95% (1.62 g scale); <sup>1</sup>H NMR (400 MHz, CDCl<sub>3</sub>) δ 7.34 – 7.30 (m, 4H), 7.30 – 7.27 (m, 1H), 6.62 (d, *J* = 7.8 Hz, 1H), 5.56 (d, *J* = 9.0 Hz, 1H), 5.08 – 5.06 (m, 1H), 4.60 – 4.53 (m, 1H), 4.28 – 4.22 (m, 3H), 4.18 – 4.12 (m, 2H), 4.11 – 4.05 (m, 3H), 2.86 – 2.78 (m, 2H), 2.75 – 2.70 (m, 2H), 2.49 – 2.42 (m, 2H), 2.40 – 2.30 (m, 2H), 2.18 – 2.11 (m, 2H), 1.97 – 1.89 (m, 1H), 1.26 – 1.20 (m, 6H), 0.94 (d, *J* = 6.9 Hz, 3H), 0.87 (d, *J* = 6.9 Hz, 3H); <sup>13</sup>C NMR (101 MHz, CDCl<sub>3</sub>) δ 172.9, 172.0, 171.9, 170.9, 156.4, 136.3, 128.6, 128.2, 128.1, 67.0, 64.3, 61.7, 60.7, 59.2, 51.7, 36.6, 31.1, 30.6, 30.4, 27.8, 27.3, 19.1, 17.6, 14.2, 14.1.; HRMS (ESI) *m/z* : (M+H)<sup>+</sup> Calc. for: C<sub>27</sub>H<sub>41</sub>N<sub>2</sub>O<sub>9</sub>S<sup>+</sup>, 569.2527. Found. 569.2528.

**ethyl (3-((2-((2-(4-(4-chlorobenzoyl)phenoxy)-2-methylpropanoyl)oxy)ethyl)thio)propanoyl)-L-leucinate (1af):**

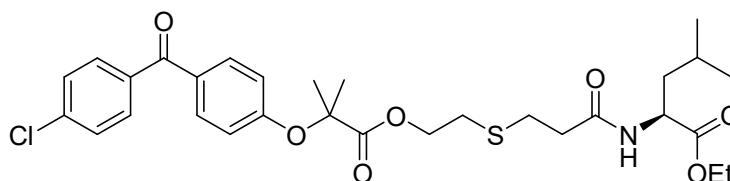

Colorless oily liquid. PE/EtOAc = 2 : 1, R<sub>f</sub> = 0.3. Yield: 92% (1.90 g scale); <sup>1</sup>H NMR (400 MHz, CDCl<sub>3</sub>) δ 7.74 – 7.66 (m, 4H), 7.45 – 7.40 (m, 2H), 6.90 – 6.83 (m, 2H), 6.25 (d, *J* = 8.2 Hz, 1H), 4.62 – 4.55 (m, 1H), 4.32 – 4.26 (m, 2H), 4.19 – 4.11 (m, 2H), 2.82 – 2.75 (m, 2H), 2.72 – 2.66 (m, 2H), 2.48 – 2.39 (m, 2H), 1.66 (s, 6H), 1.64 – 1.47 (m, 3H), 1.24 (t, *J* = 7.1 Hz, 3H), 0.94 – 0.87 (m, 6H); <sup>13</sup>C NMR (101 MHz, CDCl<sub>3</sub>) δ 194.4, 173.6, 173.1, 170.7, 159.6, 138.5, 136.3, 132.1, 131.3, 130.5, 128.6, 117.4, 79.5, 64.4, 61.4, 50.9, 41.7, 36.6, 30.6, 27.7, 25.6, 25.5, 24.9, 22.9, 22.0, 14.2.; HRMS (ESI) *m/z* : (M+H)<sup>+</sup> Calc. for: C<sub>30</sub>H<sub>39</sub>ClNO<sub>7</sub>S<sup>+</sup>, 592.2130. Found. 592.2153.

**ethyl (3-((2-((4-([1,1'-biphenyl]-4-yl)-4-oxobutanoyl)oxy)ethyl)thio)propanoyl)-L-leucinate (1ah):**

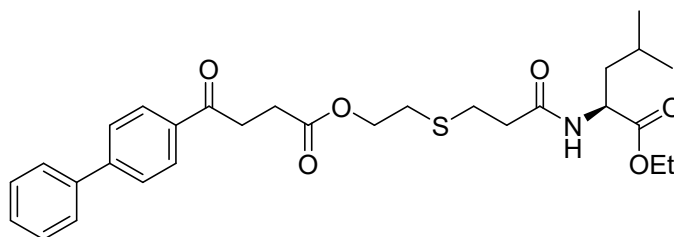

Yellow oily liquid. PE/EtOAc = 2 : 1, R<sub>f</sub> = 0.1. Yield: 87% (1.61 g scale); <sup>1</sup>H NMR (500 MHz, CDCl<sub>3</sub>) δ 8.07 – 8.02 (m, 2H), 7.70 – 7.65 (m, 2H), 7.63 – 7.59 (m, 2H), 7.48 – 7.43 (m, 2H), 7.41 – 7.36 (m, 1H), 6.31 (d, *J* = 8.3 Hz, 1H), 4.65 – 4.58 (m, 1H), 4.30 – 4.24 (m, 2H), 4.18 – 4.12 (m, 2H), 3.38 – 3.32 (m, 2H), 2.90 – 2.85 (m, 2H), 2.81 – 2.75 (m, 4H), 2.59 – 2.48 (m, 2H), 1.70 – 1.57 (m, 2H), 1.54 – 1.47 (m, 1H), 1.25 (t, *J* = 7.1 Hz, 3H), 0.92 (t, *J* = 6.1 Hz, 6H); <sup>13</sup>C NMR (126 MHz, CDCl<sub>3</sub>) δ 197.8, 173.1, 172.8, 170.8, 146.0, 139.8, 135.2, 129.0, 128.7, 128.3, 127.3, 77.4, 64.0, 61.4, 50.9, 41.7, 36.8, 33.4, 30.7, 28.3, 27.9, 24.9, 22.9, 22.0, 14.2.; HRMS (ESI) *m/z* : (M+H)<sup>+</sup> Calc. for: C<sub>29</sub>H<sub>38</sub>NO<sub>6</sub>S<sup>+</sup>, 528.2414. Found. 528.2421.

### The preparation of **1ag** :

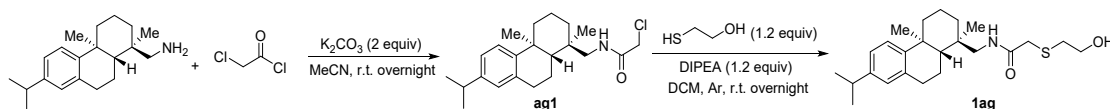

**Step 1:** To a stirred solution of dehydroabietylamine (2.85 g, 10 mmol, 1 equiv) and K<sub>2</sub>CO<sub>3</sub> (2.76 g, 20 mmol, 2 equiv) in MeCN (20 mL) was added dropwise chloroacetyl chloride (1.13 g, 10 mmol, 1 equiv) at 0 °C. The resulting mixture was allowed to warm to room temperature and stirred overnight. After completion of the reaction as monitored by TLC, the mixture was washed with brine (30 mL), and the aqueous phase was extracted with DCM (3 × 20 mL). The combined organic layers were dried over anhydrous Na<sub>2</sub>SO<sub>4</sub>, filtered, and concentrated under reduced pressure. The residue was purified by silica gel column chromatography (300 - 400 mesh, eluting with PE/EtOAc = 5 : 1) to afford compound **ag1** (1.36 g, 38% yield).

**Step 2:** Under an argon atmosphere, a mixture of compound **ag1** (1.35 g, 3.7 mmol, 1.0 equiv), 2-mercaptoethanol (344 mg, 4.4 mmol, 1.2 equiv), and DIPEA (569 mg, 4.4 mmol, 1.2 equiv) in DCM (10 mL) was stirred at room temperature overnight. After completion of the reaction as monitored by TLC, the mixture was washed with brine (30 mL), and the aqueous phase was extracted with DCM (3 × 20 mL). The combined organic layers were dried over anhydrous Na<sub>2</sub>SO<sub>4</sub>, filtered, and concentrated under reduced pressure. The residue was purified by silica gel column chromatography (300

- 400 mesh, eluting with DCM/MeOH = 20 : 1) to afford compound **1ag** (1.25 g, 84% yield).

**2-((2-hydroxyethyl)thio)-N-(((1R,4aS,10aR)-7-isopropyl-1,4a-dimethyl-1,2,3,4,4a,9,10,10a-octahydrophenanthren-1-yl)methyl)acetamide (1ag):**

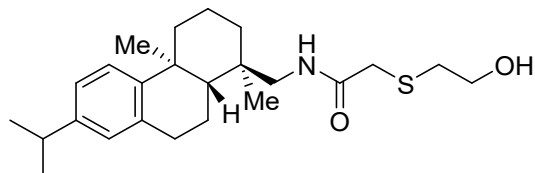

Colorless oily liquid. DCM/MeOH = 20 : 1,  $R_f$  = 0.4. Yield: 83% (1.25g scale);  $^1\text{H NMR}$  (500 MHz,  $\text{CDCl}_3$ )  $\delta$  7.18 – 7.15 (m, 1H), 7.01 – 6.97 (m, 1H), 6.89 (s, 1H), 6.86 – 6.78 (m, 1H), 3.70 – 3.65 (m, 2H), 3.31 – 3.26 (m, 1H), 3.25 (s, 2H), 3.14 – 3.08 (m, 1H), 2.96 – 2.89 (m, 1H), 2.86 – 2.78 (m, 2H), 2.70 – 2.65 (m, 2H), 2.40 (br, 1H), 2.32 – 2.27 (m, 1H), 1.93 – 1.86 (m, 1H), 1.80 – 1.71 (m, 2H), 1.70 – 1.66 (m, 1H), 1.47 – 1.27 (m, 4H), 1.23 – 1.20 (m, 9H), 0.95 (s, 3H).;  $^{13}\text{C NMR}$  (126 MHz,  $\text{CDCl}_3$ )  $\delta$  169.4, 147.2, 145.9, 134.9, 127.0, 124.3, 124.0, 61.3, 50.3, 45.4, 38.5, 37.6, 37.5, 36.4, 36.2, 33.6, 30.2, 25.3, 24.1, 24.0, 19.1, 18.9, 18.7.; **HRMS (ESI)**  $m/z$  :  $(\text{M}+\text{H})^+$  Calc. for:  $\text{C}_{24}\text{H}_{38}\text{NO}_2\text{S}^+$ , 404.2618. Found. 404.2616.

**The preparation of 2ai :**

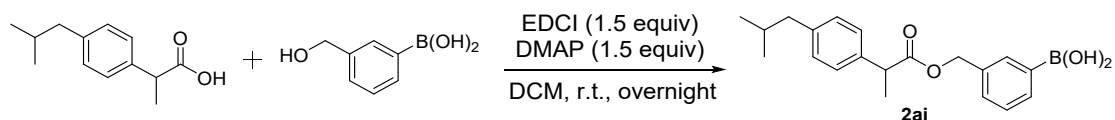

To a stirred solution of ibuprofen (1.03 g, 5.0 mmol, 1.0 equiv) and 3-(hydroxymethyl)phenylboronic acid (0.76 g, 5.0 mmol, 1.0 equiv) in DCM (15 mL) at 0 °C were added sequentially EDCI (1.44 g, 7.5 mmol, 1.5 equiv) and DMAP (0.92 g, 7.5 mmol, 1.5 equiv). The ice bath was then removed, and the mixture was allowed to warm to room temperature and stirred overnight. The reaction progress was monitored by TLC until complete consumption of the starting materials. Upon completion, the mixture was acidified with 1 M aqueous HCl and extracted with DCM (3 × 20 mL). The combined organic layers were dried over anhydrous  $\text{Na}_2\text{SO}_4$ , filtered, and concentrated under reduced pressure. The residue was purified by silica gel column chromatography (300 - 400 mesh, PE/EtOAc = 2 : 1) to afford the target compound **2ai** (1.24 g, 73% yield).

**(3-(((2-(4-isobutylphenyl)propanoyl)oxy)methyl)phenyl)boronic acid (2ai):**

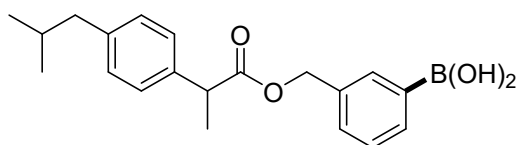

Colorless oily liquid. PE/EtOAc = 2 : 1, R<sub>f</sub> = 0.5. Yield: 73% (1.24 g scale); <sup>1</sup>H NMR (400 MHz, CDCl<sub>3</sub>) δ 8.23 – 8.19 (m, 1H), 8.17 (s, 1H), 7.53 – 7.47 (m, 2H), 7.31 – 7.27 (m, 2H), 7.15 – 7.12 (m, 2H), 5.33 – 5.22 (m, 2H), 3.89 – 3.82 (m, 1H), 2.48 (d, *J* = 7.2 Hz, 2H), 1.93 – 1.82 (m, 1H), 1.61 (d, *J* = 7.2 Hz, 3H), 0.94 (d, *J* = 6.6 Hz, 6H).; <sup>13</sup>C NMR (101 MHz, CDCl<sub>3</sub>) δ 174.6, 140.6, 137.7, 135.9, 135.5, 135.1, 132.4, 129.4, 129.3, 128.3, 127.3, 66.4, 45.3, 45.1, 30.2, 22.5, 18.6.; HRMS (ESI) *m/z* : (M+Na)<sup>+</sup> Calc. for: C<sub>20</sub>H<sub>25</sub>BNaO<sub>4</sub><sup>+</sup>, 363.1738. Found. 363.1744.

**Substrates 1ak, 1al were prepared analogously to 1am:**

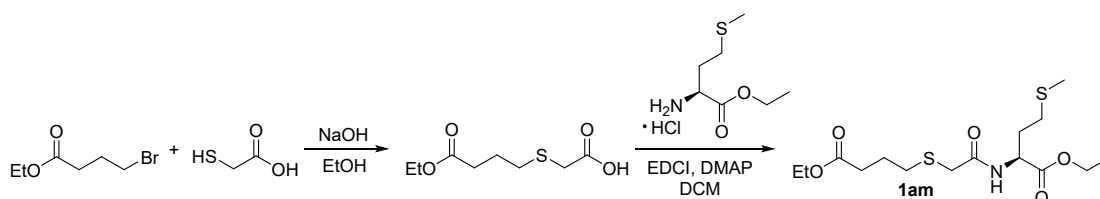

**Step 1:** To a solution of mercaptoacetic acid (2.77 g, 30.0 mmol, 1.0 equiv) and ethyl 4-bromobutyrate (5.85 g, 30.0 mmol, 1.0 equiv) in EtOH (20 mL) was added NaOH (2.40 g, 60 mmol, 2.0 equiv) at 0 °C. The resulting mixture was allowed to warm to room temperature and stirred for 3 h. After completion of the reaction as monitored by TLC, the mixture was concentrated under reduced pressure. The residue was acidified with 1 M aqueous HCl and extracted with DCM (3 × 20 mL) and water. The combined organic layers were dried over anhydrous Na<sub>2</sub>SO<sub>4</sub>, filtered, and concentrated under reduced pressure. The crude product was purified by silica gel column chromatography (300–400 mesh, eluting with DCM/MeOH = 20 : 1) to afford the product (4.27 g, 69% yield).

**Step 2:** To a stirred solution of 2-((4-ethoxy-4-oxobutyl)thio)acetic acid (1.03 g, 5.0 mmol, 1.0 equiv) in DCM (15 mL) were added EDCI (1.44 g, 7.5 mmol, 1.5 equiv) and DMAP (0.92 g, 7.5 mmol, 1.5 equiv) at 0 °C. Subsequently, a solution of L-Methionine ethyl ester hydrochloride (1.07 g, 5.0 mmol, 1.0 equiv) was added dropwise. The reaction mixture was allowed to warm to room temperature and stirred for 4 h. Upon completion as monitored by TLC, the reaction mixture was diluted with DCM (30 mL) and washed sequentially with 1 M aqueous HCl (3 × 20 mL) and brine (20 mL). The organic layer was dried over anhydrous Na<sub>2</sub>SO<sub>4</sub>, filtered, and concentrated under

reduced pressure. The residue was purified by silica gel column chromatography (300–400 mesh, eluting with PE/EtOAc = 2 : 1) to afford the product **1am** (1.36 g, 75% yield).

**ethyl (3-((2-((acetylglycyl)oxy)ethyl)thio)propanoyl)-L-leucinate (1ak):**

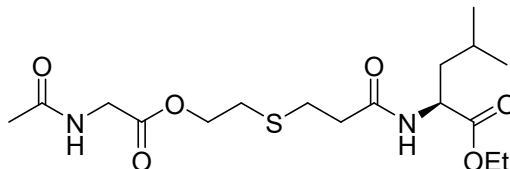

Colorless oily liquid. DCM/MeOH = 20 : 1, R<sub>f</sub> = 0.5. Yield: 97% (1.33 g scale); <sup>1</sup>H NMR (500 MHz, CDCl<sub>3</sub>) δ 6.75 – 6.68 (m, 1H), 6.59 – 6.54 (m, 1H), 4.57 – 4.51 (m, 1H), 4.30 – 4.23 (m, 2H), 4.15 – 4.10 (m, 2H), 3.98 (d, *J* = 5.5 Hz, 2H), 2.86 – 2.79 (m, 2H), 2.75 – 2.71 (m, 2H), 2.50 – 2.45 (m, 2H), 1.99 (s, 3H), 1.65 – 1.54 (m, 2H), 1.52 – 1.46 (m, 1H), 1.24 – 1.21 (m, 3H), 0.89 (d, *J* = 6.4 Hz, 6H); <sup>13</sup>C NMR (126 MHz, CDCl<sub>3</sub>) δ 173.2 , 171.0 , 170.7 , 170.0 , 64.8 , 61.3 , 50.9 , 41.5 , 41.4 , 36.7 , 30.6 , 28.0 , 24.9 , 22.8 , 22.7 , 21.9 , 14.2.; HRMS (ESI) *m/z* : (M)<sup>+</sup> Calc. for: C<sub>17</sub>H<sub>31</sub>N<sub>2</sub>O<sub>6</sub>S<sup>+</sup>, 391.1897. Found. 391.1902.

**ethyl (3-((2-((acetylmethionyl)oxy)ethyl)thio)propanoyl)-L-leucinate (1al):**

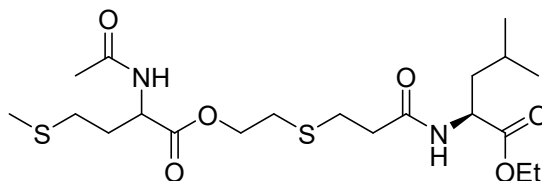

Yellow oily liquid. DCM/MeOH = 20 : 1, R<sub>f</sub> = 0.5. Yield: 87% (1.42 g scale); <sup>1</sup>H NMR (500 MHz, CDCl<sub>3</sub>) δ 6.85 – 6.77 (m, 1H), 6.59 – 6.51 (m, 1H), 4.67 – 4.61 (m, 1H), 4.57 – 4.51 (m, 1H), 4.34 – 4.19 (m, 2H), 4.16 – 4.09 (m, 2H), 2.89 – 2.79 (m, 2H), 2.76 – 2.71 (m, 2H), 2.53 – 2.46 (m, 4H), 2.14 – 2.06 (m, 1H), 2.04 (s, 3H), 1.98 (s, 3H), 1.96 – 1.90 (m, 1H), 1.66 – 1.54 (m, 2H), 1.52 – 1.46 (m, 1H), 1.25 – 1.20 (m, 3H), 0.89 (d, *J* = 6.3 Hz, 6H); <sup>13</sup>C NMR (126 MHz, CDCl<sub>3</sub>) δ 173.2 , 172.0 (d, *J* = 4.8 Hz), 171.0 , 170.4 (d, *J* = 1.4 Hz), 64.9 (d, *J* = 9.9 Hz), 61.4 , 51.8 (d, *J* = 9.0 Hz), 50.9 (d, *J* = 1.6 Hz), 41.5 , 36.7 , 31.5 (d, *J* = 1.3 Hz), 30.5 , 30.1 , 27.9 (d, *J* = 1.9 Hz), 24.9 , 23.0 , 22.8 , 22.0 (d, *J* = 1.6 Hz), 15.5 , 14.1.; HRMS (ESI) *m/z* : (M)<sup>+</sup> Calc. for: C<sub>20</sub>H<sub>37</sub>N<sub>2</sub>O<sub>6</sub>S<sub>2</sub><sup>+</sup>, 465.2088. Found. 465.2093.

**ethyl (2-((4-ethoxy-4-oxobutyl)thio)acetyl)-L-methioninate (1am):**

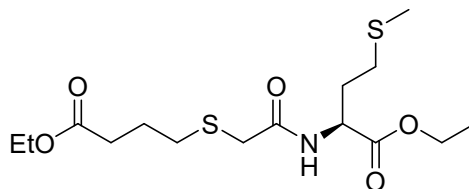

Yellow oily liquid. PE/EtOAc = 2 : 1, R<sub>f</sub> = 0.6. Yield: 75% (1.36 g scale); <sup>1</sup>H NMR (500 MHz, CDCl<sub>3</sub>) δ 7.36 (d, *J* = 8.0 Hz, 1H), 4.65 – 4.60 (m, 1H), 4.18 – 4.12 (m, 2H), 4.09 – 4.04 (m, 2H), 3.19 (s, 2H), 2.60 – 2.55 (m, 2H), 2.49 – 2.44 (m, 2H), 2.39 – 2.33 (m, 2H), 2.16 – 2.08 (m, 1H), 2.04 (s, 3H), 2.01 – 1.93 (m, 1H), 1.91 – 1.84 (m, 2H), 1.25 – 1.17 (m, 6H); <sup>13</sup>C NMR (126 MHz, CDCl<sub>3</sub>) δ 172.8 , 171.6 , 168.8 , 61.7 , 60.5 , 51.8 , 35.7 , 32.9 , 32.1 , 31.6 , 30.0 ,

24.2 , 15.5 , 14.2 , 14.1.; **HRMS (ESI)** m/z : (M)<sup>+</sup> Calc. for: C<sub>15</sub>H<sub>28</sub>NO<sub>5</sub>S<sub>2</sub><sup>+</sup>, 366.1403. Found. 366.1409.

#### 4. Procedures for preparation of aryl sulfonium salts (**3a** - **3aj**):

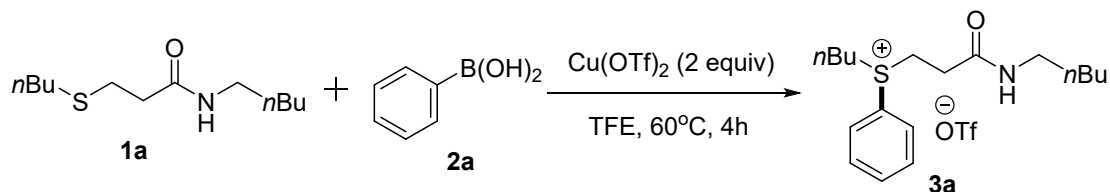

A mixture of **1a** (138.6 mg, 0.60 mmol, 2 equiv) and phenylboronic acid **2a** (36.6 mg, 0.30 mmol, 1 equiv) in TFE (1.0 mL) was stirred at room temperature. Cu(OTf)<sub>2</sub> (217 mg, 0.60 mmol, 2 equiv) was added in one portion, and the resulting mixture was stirred at 60 °C for 4 h under air. The reaction progress was monitored by TLC until complete consumption of the starting materials. Upon completion, the mixture was allowed to cool to room temperature. After completed, the reaction mixture was subjected to silica gel column chromatography (300 - 400 mesh silica gel; DCM/MeOH = 20 : 1 ) to afford the product **3a**.

#### Scale-up synthesis of **3a**:

A mixture of **1a** (1.39 g, 6.0 mmol, 2 equiv) and phenylboronic acid (366 mg, 3.0 mmol, 1 equiv) in TFE (10 mL) was stirred at room temperature. Cu(OTf)<sub>2</sub> (2.17 g, 6.0 mmol, 2.0 equiv) was added in one portion, and the resulting mixture was stirred at 60 °C for 4 h. The reaction progress was monitored by TLC until complete consumption of the starting materials. After cooling to room temperature, the solvent was removed under reduced pressure. The residue was purified by silica gel column chromatography (300 - 400 mesh silica gel; DCM/MeOH = 20 : 1) to afford the product **3a** (1.27 g, 93% yield).

**butyl(3-oxo-3-(pentylamino)propyl)(phenyl)sulfonium trifluoromethanesulfonate (3a):**

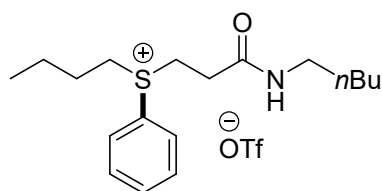

Colorless oily liquid. DCM/MeOH = 10 : 1, R<sub>f</sub> = 0.6. Yield: 94% (86.2 mg scale); <sup>1</sup>H NMR (400 MHz, CDCl<sub>3</sub>) δ 8.01 – 7.91 (m, 2H), 7.76 – 7.69 (m, 1H), 7.68 – 7.61 (m, 2H), 7.34 – 7.27 (m, 1H), 4.05 – 3.94 (m, 1H), 3.89 – 3.81 (m, 1H), 3.80 – 3.71 (m, 2H), 3.14 – 3.03 (m, 2H), 2.94 – 2.83 (m, 1H), 2.74 – 2.64 (m, 1H), 1.63 – 1.46 (m, 2H), 1.46 – 1.38 (m, 4H), 1.28 – 1.19 (m, 4H), 0.89 – 0.80 (m, 6H).; <sup>13</sup>C NMR (101 MHz, CDCl<sub>3</sub>) δ 168.9, 134.9, 131.6, 131.4, 122.1, 44.1, 42.2, 39.9, 30.2, 29.1, 28.8, 26.7, 22.3, 21.3, 14.0, 13.3.; HRMS (ESI) m/z : (M)<sup>+</sup> Calc. for: C<sub>18</sub>H<sub>30</sub>NOS<sup>+</sup>, 308.2043. Found. 308.2043.

**[1,1'-biphenyl]-4-yl(butyl)(3-oxo-3-(pentylamino)propyl)sulfonium trifluoromethanesulfonate (3b):**

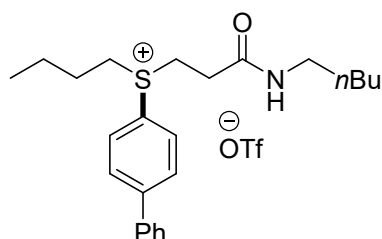

Colorless oily liquid. DCM/MeOH = 10 : 1, R<sub>f</sub> = 0.6. Yield: 80% (85.0 mg scale); <sup>1</sup>H NMR (400 MHz, CDCl<sub>3</sub>) δ 8.09 – 7.99 (m, 2H), 7.90 – 7.80 (m, 2H), 7.64 – 7.56 (m, 2H), 7.51 – 7.40 (m, 3H), 7.37 – 7.28 (m, 1H), 4.11 – 3.99 (m, 1H), 3.98 – 3.87 (m, 1H), 3.84 – 3.73 (m, 2H), 3.17 – 3.07 (m, 2H), 3.00 – 2.90 (m, 1H), 2.82 – 2.70 (m, 1H), 1.68 – 1.52 (m, 2H), 1.51 – 1.41 (m, 4H), 1.28 – 1.20 (m, 4H), 0.93 – 0.87 (m, 3H), 0.86 – 0.80 (m, 3H).; <sup>13</sup>C NMR (101 MHz, CDCl<sub>3</sub>) δ 169.1, 148.0, 138.3, 132.1, 129.9, 129.3, 129.2, 127.5, 120.0, 44.1, 42.3, 40.0, 30.3, 29.1, 28.8, 26.7, 22.4, 21.4, 14.0, 13.4.; HRMS (ESI) m/z : (M)<sup>+</sup> Calc. for: C<sub>24</sub>H<sub>34</sub>NOS<sup>+</sup>, 384.2356. Found. 384.2355.

**butyl(3-oxo-3-(pentylamino)propyl)(p-tolyl)sulfonium trifluoromethanesulfonate (3c):**

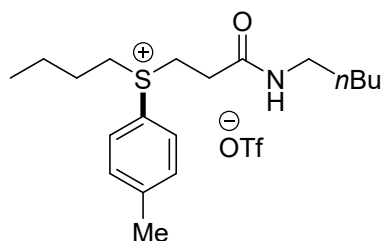

Colorless oily liquid. DCM/MeOH = 10 : 1, R<sub>f</sub> = 0.5. Yield: 80% (113.6 mg scale); <sup>1</sup>H NMR (400 MHz, CDCl<sub>3</sub>) δ 7.84 – 7.76 (m, 2H), 7.46 – 7.38 (m, 2H), 7.32 – 7.27 (m, 1H), 3.98 – 3.88 (m, 1H), 3.84 – 3.75 (m, 1H), 3.74 – 3.66 (m, 2H), 3.11 – 3.03 (m, 2H), 2.88 – 2.78 (m, 1H), 2.69 – 2.60 (m, 1H), 2.42 (s, 3H), 1.60 – 1.45 (m, 2H), 1.44 – 1.37 (m, 4H), 1.26 – 1.18 (m, 4H), 0.86 – 0.79 (m, 6H).; <sup>13</sup>C NMR (101 MHz, CDCl<sub>3</sub>) δ 168.8, 146.4, 132.1, 131.4, 118.1, 44.0, 42.1, 39.8, 30.1, 29.0, 28.8, 26.6, 22.3, 21.7, 21.3, 13.9, 13.3.; HRMS (ESI) m/z : (M)<sup>+</sup> Calc. for: C<sub>19</sub>H<sub>32</sub>NOS<sup>+</sup>, 322.2199. Found. 322.2189.

**butyl(4-methoxyphenyl)(3-oxo-3-(pentylamino)propyl)sulfonium**

**trifluoromethanesulfonate (3d):**

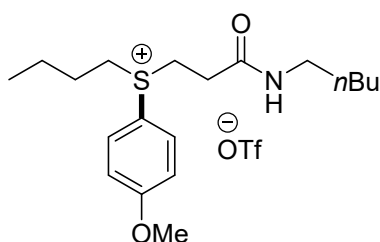

Colorless oily liquid. DCM/MeOH = 10 : 1, R<sub>f</sub> = 0.5. Yield: 55% (79.8 mg scale); <sup>1</sup>H NMR (400 MHz, CDCl<sub>3</sub>) δ 7.91 – 7.82 (m, 2H), 7.34 – 7.27 (m, 1H), 7.15 – 7.08 (m, 2H), 3.96 – 3.89 (m, 1H), 3.87 (s, 3H), 3.84 – 3.75 (m, 1H), 3.71 – 3.63 (m, 2H), 3.14 – 3.06 (m, 2H), 2.88 – 2.79 (m, 1H), 2.70 – 2.61 (m, 1H), 1.60 – 1.46 (m, 2H), 1.46 – 1.39 (m, 4H), 1.27 – 1.20 (m, 4H), 0.89 – 0.81 (m, 6H). <sup>13</sup>C NMR (101 MHz, CDCl<sub>3</sub>) δ 168.9, 164.8, 133.6, 117.0, 110.7, 56.0, 44.1, 42.2, 39.9, 30.2, 29.1, 28.8, 26.6, 22.3, 21.3, 14.0, 13.3.; HRMS (ESI) m/z : (M)<sup>+</sup> Calc. for: C<sub>19</sub>H<sub>32</sub>NO<sub>2</sub>S<sup>+</sup>, 338.2148. Found. 338.2151.

**butyl(4-cyanophenyl)(3-oxo-3-(pentylamino)propyl)sulfonium trifluoromethanesulfonate (3e):**

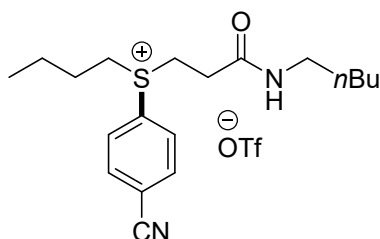

Reaction was conducted for 8h. Colorless oily liquid. DCM/MeOH = 10 : 1, R<sub>f</sub> = 0.4. Yield: 65% (94.0 mg scale); <sup>1</sup>H NMR (400 MHz, CDCl<sub>3</sub>) δ 8.24 – 8.17 (m, 2H), 7.97 – 7.90 (m, 2H), 7.24 – 7.16 (m, 1H), 4.09 – 3.99 (m, 1H), 3.97 – 3.89 (m, 1H), 3.88 – 3.75 (m, 2H), 3.12 – 3.02 (m, 2H), 2.99 – 2.89 (m, 1H), 2.77 – 2.67 (m, 1H), 1.68 – 1.47 (m, 2H), 1.45 – 1.37 (m, 4H), 1.28 – 1.18 (m, 4H), 0.90 – 0.81 (m, 6H). <sup>13</sup>C NMR (101 MHz, CDCl<sub>3</sub>) δ 169.0, 134.5, 132.7, 128.3, 118.5, 116.7, 44.7, 42.5, 39.9, 30.2, 29.0, 28.8, 26.8, 22.3, 21.4, 14.0, 13.3.; HRMS (ESI) m/z : (M)<sup>+</sup> Calc. for: C<sub>19</sub>H<sub>29</sub>N<sub>2</sub>OS<sup>+</sup>, 333.1995. Found. 333.1992.

**butyl(4-fluorophenyl)(3-oxo-3-(pentylamino)propyl)sulfonium trifluoromethanesulfonate (3f):**

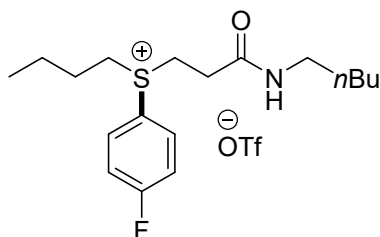

Colorless oily liquid. DCM/MeOH = 10 : 1, R<sub>f</sub> = 0.6. Yield: 69% (98.4 mg scale); <sup>1</sup>H NMR (400 MHz, CDCl<sub>3</sub>) δ 8.11 – 7.99 (m, 2H), 7.39 – 7.30 (m, 2H), 7.30 – 7.26 (m, 1H), 4.03 – 3.92 (m, 1H), 3.90 – 3.81 (m, 1H), 3.80 – 3.69 (m, 2H), 3.14 – 3.02 (m, 2H), 2.95 – 2.83 (m, 1H), 2.72 – 2.63 (m, 1H), 1.63 – 1.47 (m, 2H), 1.45 – 1.36 (m, 4H), 1.28 – 1.17 (m, 4H), 0.90 – 0.78 (m, 6H). <sup>13</sup>C NMR (101 MHz, CDCl<sub>3</sub>) δ 168.9, 166.4 (d, J = 259.4 Hz), 134.6 (d, J = 9.7 Hz), 119.0 (d, J = 23.0 Hz), 117.4 (d, J = 3.2 Hz), 44.4, 42.5, 39.9, 30.2, 29.1, 28.8, 26.7, 22.3, 21.3, 14.0, 13.3. <sup>19</sup>F NMR (376 MHz, CDCl<sub>3</sub>) δ -78.51, -100.60.; HRMS (ESI) m/z : (M)<sup>+</sup> Calc. for:

C<sub>18</sub>H<sub>29</sub>FNOS<sup>+</sup>, 326.1948. Found. 326.1959.

**butyl(2-chlorophenyl)(3-oxo-3-(pentylamino)propyl)sulfonium trifluoromethanesulfonate (3g):**

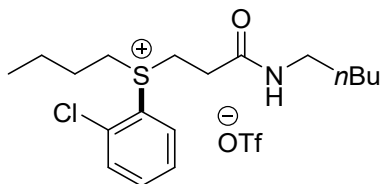

Colorless oily liquid. DCM/MeOH = 10 : 1, R<sub>f</sub> = 0.4. Yield: 65% (96.4 mg scale); <sup>1</sup>H NMR (400 MHz, CDCl<sub>3</sub>) δ 8.23 – 8.18 (m, 1H), 7.68 – 7.63 (m, 2H), 7.62 – 7.58 (m, 1H), 7.32 – 7.26 (m, 1H), 4.13 – 4.03 (m, 1H), 3.93 – 3.81 (m, 3H), 3.13 – 3.06 (m, 2H), 2.99 – 2.89 (m, 1H), 2.85 – 2.75 (m, 1H), 1.63 – 1.51 (m, 2H), 1.50 – 1.40 (m, 4H), 1.28 – 1.19 (m, 4H), 0.91 – 0.81 (m, 6H). <sup>13</sup>C NMR (101 MHz, CDCl<sub>3</sub>) δ 168.6, 137.8, 135.7, 132.0, 131.6, 130.4, 122.1, 44.6, 41.9, 39.9, 30.3, 29.0, 28.8, 26.6, 22.3, 21.4, 14.0, 13.3. HRMS (ESI) m/z : (M)<sup>+</sup> Calc. for: C<sub>18</sub>H<sub>29</sub>ClNOS<sup>+</sup>, 342.1653. Found. 342.1653.

**(2-bromophenyl)(butyl)(3-oxo-3-(pentylamino)propyl)sulfonium trifluoromethanesulfonate (3h):**

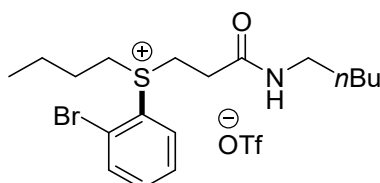

Colorless oily liquid. DCM/MeOH = 10 : 1, R<sub>f</sub> = 0.6. Yield: 77% (123.1 mg scale); <sup>1</sup>H NMR (400 MHz, CDCl<sub>3</sub>) δ 8.23 – 8.16 (m, 1H), 7.79 – 7.74 (m, 1H), 7.73 – 7.67 (m, 1H), 7.60 – 7.54 (m, 1H), 7.31 – 7.26 (m, 1H), 4.11 – 4.02 (m, 1H), 3.91 – 3.79 (m, 3H), 3.13 – 3.06 (m, 2H), 2.97 – 2.88 (m, 1H), 2.84 – 2.74 (m, 1H), 1.63 – 1.51 (m, 2H), 1.49 – 1.39 (m, 4H), 1.27 – 1.20 (m, 4H), 0.90 – 0.85 (m, 3H), 0.85 – 0.80 (m, 3H). <sup>13</sup>C NMR (101 MHz, CDCl<sub>3</sub>) δ 168.6, 135.8, 134.9, 132.0, 131.0, 127.4, 124.3, 44.9, 42.2, 39.9, 30.3, 29.0, 28.8, 26.6, 22.3, 21.5, 14.0, 13.3. HRMS (ESI) m/z : (M)<sup>+</sup> Calc. for: C<sub>18</sub>H<sub>29</sub>BrNOS<sup>+</sup>, 386.1148. Found. 386.1143.

**butyl(2-(methylthio)phenyl)(3-oxo-3-(pentylamino)propyl)sulfonium trifluoromethanesulfonate (3i):**

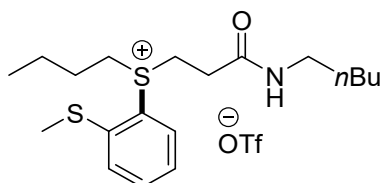

Colorless oily liquid. DCM/MeOH = 10 : 1, R<sub>f</sub> = 0.6. Yield: 57% (85.8 mg scale); <sup>1</sup>H NMR (400 MHz, CDCl<sub>3</sub>) δ 8.05 – 7.98 (m, 1H), 7.65 – 7.60 (m, 1H), 7.51 – 7.41 (m, 2H), 7.31 – 7.26 (m, 1H), 4.06 – 3.96 (m, 1H), 3.85 – 3.73 (m, 3H), 3.15 – 3.06 (m, 2H), 2.90 – 2.81 (m, 1H), 2.80 – 2.71 (m, 1H), 2.54 (s, 3H), 1.63 – 1.52 (m, 2H), 1.49 – 1.40 (m, 4H), 1.27 – 1.19 (m, 4H), 0.90 – 0.80 (m, 6H). <sup>13</sup>C NMR (101 MHz, CDCl<sub>3</sub>) δ 168.6, 144.8, 134.9, 130.7, 128.7, 128.6, 121.0, 44.2, 41.6, 39.9, 30.3, 29.0, 28.8, 26.6, 22.3, 21.4, 17.0, 14.0, 13.3. HRMS (ESI) m/z : (M)<sup>+</sup> Calc. for: C<sub>19</sub>H<sub>32</sub>NOS<sub>2</sub><sup>+</sup>, 354.1920. Found. 354.1919.

**butyl(4-formylphenyl)(3-oxo-3-(pentylamino)propyl)sulfonium**

**trifluoromethanesulfonate (3j):**

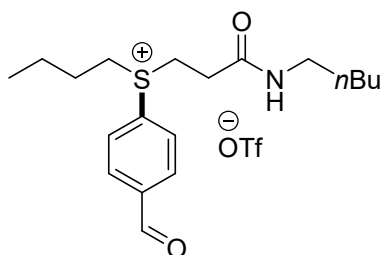

Colorless oily liquid. DCM/MeOH = 10 : 1, R<sub>f</sub> = 0.4. Yield: 72% (104.3 mg scale); <sup>1</sup>H NMR (400 MHz, CDCl<sub>3</sub>) δ 10.10 (s, 1H), 8.24 – 8.19 (m, 2H), 8.16 – 8.10 (m, 2H), 7.26 – 7.21 (m, 1H), 4.09 – 4.01 (m, 1H), 3.97 – 3.91 (m, 1H), 3.87 – 3.80 (m, 2H), 3.10 – 3.04 (m, 2H), 2.97 – 2.89 (m, 1H), 2.75 – 2.67 (m, 1H), 1.64 – 1.49 (m, 2H), 1.45 – 1.38 (m, 4H), 1.25 – 1.19 (m, 4H), 0.87 – 0.80 (m, 6H). <sup>13</sup>C NMR (101 MHz, CDCl<sub>3</sub>) δ 190.6, 168.9, 140.3, 132.6, 131.7, 128.5, 44.5, 42.4, 39.9, 30.2, 29.0, 28.8, 26.8, 22.3, 21.4, 14.0, 13.3. HRMS (ESI) m/z : (M)<sup>+</sup> Calc. for: C<sub>19</sub>H<sub>30</sub>NO<sub>2</sub>S<sup>+</sup>, 336.1992. Found. 336.1990.

**(3-aminophenyl)(butyl)(3-oxo-3-(pentylamino)propyl)sulfonium trifluoromethanesulfonate (3k):**

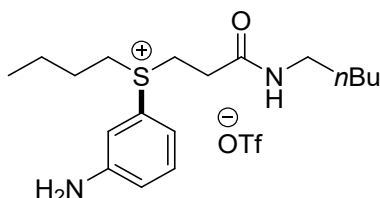

Yellow oily liquid. DCM/MeOH = 10 : 1, R<sub>f</sub> = 0.3. Yield: 58% (81.8 mg scale); <sup>1</sup>H NMR (400 MHz, CDCl<sub>3</sub>) δ 7.36 (s, 1H), 7.25 – 7.20 (m, 1H), 7.17 – 7.11 (m, 1H), 6.98 – 6.92 (m, 2H), 4.59 (br, 2H), 3.84 – 3.76 (m, 1H), 3.75 – 3.68 (m, 1H), 3.65 – 3.58 (m, 2H), 3.14 – 3.07 (m, 2H), 2.83 – 2.73 (m, 1H), 2.67 – 2.57 (m, 1H), 1.61 – 1.49 (m, 2H), 1.47 – 1.38 (m, 4H), 1.28 – 1.20 (m, 4H), 0.89 – 0.81 (m, 6H). <sup>13</sup>C NMR (101 MHz, CDCl<sub>3</sub>) δ 168.8, 151.0, 131.3, 121.5, 121.2, 120.5, 113.5, 44.0, 41.7, 39.9, 30.1, 29.1, 28.9, 26.6, 22.4, 21.4, 14.0, 13.3. HRMS (ESI) m/z : (M)<sup>+</sup> Calc. for: C<sub>18</sub>H<sub>31</sub>N<sub>2</sub>OS<sup>+</sup>, 323.2152. Found. 323.2162.

**(4-acetamidophenyl)(butyl)(3-oxo-3-(pentylamino)propyl)sulfonium trifluoromethanesulfonate (3l):**

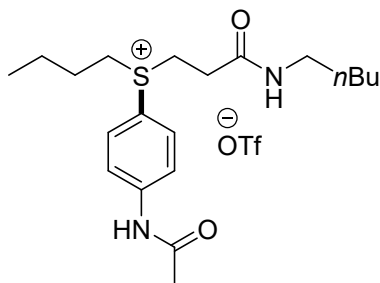

Colorless oily liquid. DCM/MeOH = 10 : 1, R<sub>f</sub> = 0.3. Yield: 68% (104.6 mg scale); <sup>1</sup>H NMR (400 MHz, CDCl<sub>3</sub>) δ 9.62 (s, 1H), 7.96 – 7.89 (m, 2H), 7.83 – 7.76 (m, 2H), 7.26 – 7.22 (m, 1H), 3.94 – 3.78 (m, 2H), 3.73 – 3.60 (m, 2H), 3.13 – 3.06 (m, 2H), 2.84 – 2.73 (m, 1H), 2.70 – 2.59 (m, 1H), 2.16 (s, 3H), 1.59 – 1.46 (m, 2H), 1.44 – 1.35 (m, 4H), 1.26 – 1.17 (m, 4H), 0.87 – 0.77 (m, 6H). <sup>13</sup>C NMR (101 MHz, CDCl<sub>3</sub>) δ 170.7, 168.8, 145.3, 132.4, 121.6, 113.2,

44.6, 41.9, 40.0, 30.2, 29.1, 28.8, 26.6, 24.4, 22.3, 21.3, 13.9, 13.3. **HRMS (ESI)**  $m/z$  : (M)<sup>+</sup> Calc. for: C<sub>20</sub>H<sub>33</sub>N<sub>2</sub>O<sub>2</sub>S<sup>+</sup>, 365.2257. Found. 365.2246.

**butyl(naphthalen-1-yl)(3-oxo-3-(pentylamino)propyl)sulfonium trifluoromethanesulfonate (3m):**

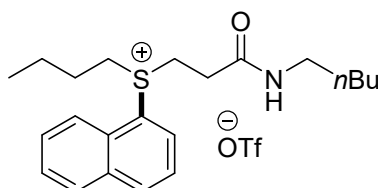

Yellow oily liquid. DCM/MeOH = 10 : 1, R<sub>f</sub> = 0.6. Yield: 63% (95.2 mg scale); **<sup>1</sup>H NMR** (400 MHz, CDCl<sub>3</sub>) δ 8.49 – 8.44 (m, 1H), 8.32 – 8.27 (m, 1H), 8.22 – 8.18 (m, 1H), 8.02 – 7.97 (m, 1H), 7.82 – 7.72 (m, 2H), 7.70 – 7.64 (m, 1H), 7.26 – 7.21 (m, 1H), 4.20 – 4.10 (m, 1H), 4.02 – 3.87 (m, 3H), 3.09 – 3.01 (m, 2H), 2.98 – 2.89 (m, 1H), 2.75 – 2.67 (m, 1H), 1.62 – 1.46 (m, 2H), 1.44 – 1.35 (m, 4H), 1.25 – 1.16 (m, 4H), 0.83 – 0.78 (m, 6H). **<sup>13</sup>C NMR** (101 MHz, CDCl<sub>3</sub>) δ 168.7, 135.3, 134.1, 133.2, 130.6, 129.7, 129.5, 128.2, 127.0, 122.3, 118.8, 44.6, 42.4, 39.8, 30.3, 29.0, 28.8, 26.7, 22.3, 21.5, 14.0, 13.3. **HRMS (ESI)**  $m/z$  : (M)<sup>+</sup> Calc. for: C<sub>22</sub>H<sub>32</sub>NOS<sup>+</sup>, 358.2199. Found. 358.2198.

**butyl(6-ethoxynaphthalen-2-yl)(3-oxo-3-(pentylamino)propyl)sulfonium trifluoromethanesulfonate (3n):**

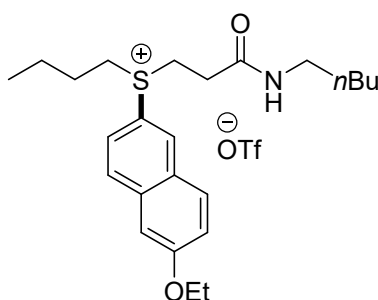

Colorless oily liquid. DCM/MeOH = 10 : 1, R<sub>f</sub> = 0.4. Yield: 65% (107.7 mg scale); **<sup>1</sup>H NMR** (400 MHz, CDCl<sub>3</sub>) δ 8.42 – 8.37 (m, 1H), 7.99 – 7.94 (m, 1H), 7.92 – 7.82 (m, 2H), 7.31 – 7.26 (m, 2H), 7.18 – 7.15 (m, 1H), 4.19 – 4.12 (m, 2H), 4.05 – 3.97 (m, 1H), 3.95 – 3.86 (m, 1H), 3.85 – 3.74 (m, 2H), 3.08 – 3.00 (m, 2H), 2.93 – 2.84 (m, 1H), 2.75 – 2.66 (m, 1H), 1.52 – 1.45 (m, 5H), 1.44 – 1.33 (m, 4H), 1.24 – 1.15 (m, 4H), 0.87 – 0.78 (m, 6H). **<sup>13</sup>C NMR** (101 MHz, CDCl<sub>3</sub>) δ 168.9, 160.5, 137.7, 134.7, 130.8, 130.7, 128.4, 124.2, 121.8, 114.4, 106.8, 64.1, 44.0, 42.2, 39.9, 30.3, 29.1, 28.8, 26.7, 22.3, 21.4, 14.6, 14.0, 13.3. **HRMS (ESI)**  $m/z$  : (M)<sup>+</sup> Calc. for: C<sub>24</sub>H<sub>36</sub>NO<sub>2</sub>S<sup>+</sup>, 402.2461. Found. 402.2476.

**butyl(9,9-dimethyl-9H-fluoren-2-yl)(3-oxo-3-(pentylamino)propyl)sulfonium trifluoromethanesulfonate (3o):**

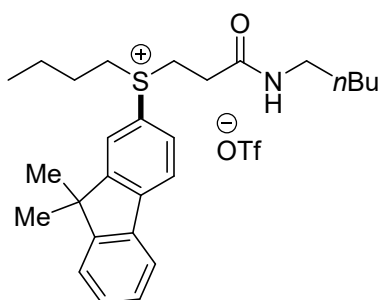

Colorless oily liquid. DCM/MeOH = 10 : 1, R<sub>f</sub> = 0.4. Yield: 61% (104.3 mg scale); <sup>1</sup>H NMR (400 MHz, CDCl<sub>3</sub>) δ 8.09 – 8.06 (m, 1H), 7.95 – 7.88 (m, 2H), 7.79 – 7.75 (m, 1H), 7.49 – 7.41 (m, 2H), 7.40 – 7.34 (m, 2H), 4.11 – 4.03 (m, 1H), 3.95 – 3.88 (m, 1H), 3.85 – 3.78 (m, 2H), 3.15 – 3.09 (m, 2H), 3.00 – 2.91 (m, 1H), 2.80 – 2.70 (m, 1H), 1.59 – 1.49 (m, 8H), 1.47 – 1.40 (m, 4H), 1.25 – 1.20 (m, 4H), 0.88 – 0.80 (m, 6H). <sup>13</sup>C NMR (101 MHz, CDCl<sub>3</sub>) δ 169.0, 156.9, 154.6, 146.3, 136.5, 131.0, 129.9, 127.7, 125.6, 123.0, 122.3, 121.5, 119.0, 47.8, 44.1, 42.5, 39.9, 30.3, 29.1, 28.8, 26.7, 26.6, 22.3, 21.3, 14.0, 13.3. HRMS (ESI) m/z : (M)<sup>+</sup> Calc. for: C<sub>27</sub>H<sub>38</sub>NOS<sup>+</sup>, 424.2669. Found. 424.2672.

**butyl(3-(diethylamino)-3-oxopropyl)(phenyl)sulfonium trifluoromethanesulfonate (3p):**

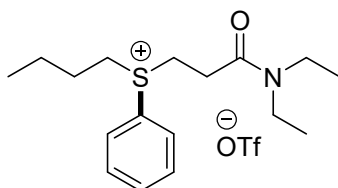

Colorless oily liquid. DCM/MeOH = 10 : 1, R<sub>f</sub> = 0.4. Yield: 90% (119.8 mg scale); <sup>1</sup>H NMR (400 MHz, CDCl<sub>3</sub>) δ 8.01 – 7.94 (m, 2H), 7.75 – 7.69 (m, 1H), 7.68 – 7.61 (m, 2H), 4.04 – 3.96 (m, 1H), 3.95 – 3.87 (m, 1H), 3.84 – 3.73 (m, 2H), 3.36 – 3.24 (m, 2H), 3.23 – 3.12 (m, 2H), 3.09 – 3.00 (m, 1H), 2.80 – 2.70 (m, 1H), 1.63 – 1.53 (m, 1H), 1.51 – 1.37 (m, 3H), 1.07 – 0.99 (m, 6H), 0.89 – 0.82 (m, 3H). <sup>13</sup>C NMR (101 MHz, CDCl<sub>3</sub>) δ 168.1, 134.8, 131.7, 131.4, 122.7, 45.0, 42.4, 42.1, 40.5, 28.5, 26.8, 21.3, 13.9, 13.3, 12.9. HRMS (ESI) m/z : (M)<sup>+</sup> Calc. for: C<sub>17</sub>H<sub>28</sub>NOS<sup>+</sup>, 294.1886. Found. 294.1902.

**butyl(3-oxo-3-(piperidin-1-yl)propyl)(phenyl)sulfonium trifluoromethanesulfonate (3q):**

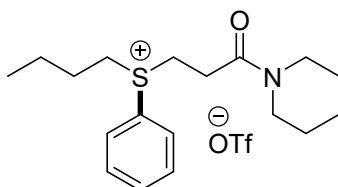

Colorless oily liquid. DCM/MeOH = 10 : 1, R<sub>f</sub> = 0.6. Yield: 99% (135.1 mg scale); <sup>1</sup>H NMR (400 MHz, CDCl<sub>3</sub>) δ 8.01 – 7.94 (m, 2H), 7.75 – 7.69 (m, 1H), 7.68 – 7.62 (m, 2H), 4.06 – 3.97 (m, 1H), 3.93 – 3.85 (m, 1H), 3.85 – 3.72 (m, 2H), 3.51 – 3.38 (m, 2H), 3.30 – 3.24 (m, 2H), 3.11 – 3.01 (m, 1H), 2.84 – 2.73 (m, 1H), 1.64 – 1.51 (m, 4H), 1.51 – 1.39 (m, 6H), 0.91 – 0.82 (m, 3H). <sup>13</sup>C NMR (101 MHz, CDCl<sub>3</sub>) δ 167.1, 134.8, 131.6, 131.4, 123.0, 46.5, 45.0, 43.1, 42.7, 28.6, 26.8, 26.1, 25.4, 24.2, 21.3, 13.3. HRMS (ESI) m/z : (M)<sup>+</sup> Calc. for: C<sub>18</sub>H<sub>28</sub>NOS<sup>+</sup>, 306.1886. Found. 306.1895.

**butyl(3-(tert-butylamino)-3-oxopropyl)(phenyl)sulfonium trifluoromethanesulfonate (3r):**

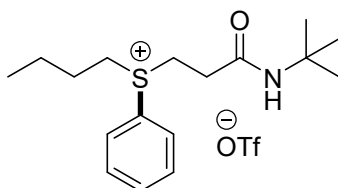

Colorless oily liquid. DCM/MeOH = 10 : 1, R<sub>f</sub> = 0.4. Yield: 94% (124.5 mg scale); <sup>1</sup>H NMR

(400 MHz, CDCl<sub>3</sub>) δ 7.98 – 7.91 (m, 2H), 7.76 – 7.70 (m, 1H), 7.68 – 7.62 (m, 2H), 6.86 (s, 1H), 3.99 – 3.91 (m, 1H), 3.85 – 3.71 (m, 3H), 2.89 – 2.79 (m, 1H), 2.69 – 2.60 (m, 1H), 1.62 – 1.52 (m, 1H), 1.50 – 1.39 (m, 3H), 1.25 (s, 9H), 0.9 (t, *J* = 6.9 Hz, 3H).. <sup>13</sup>C NMR (101 MHz, CDCl<sub>3</sub>) δ 168.2, 134.9, 131.5, 131.4, 122.1, 51.6, 44.0, 42.1, 30.9, 28.5, 26.7, 21.3, 13.3. **HRMS (ESI)** *m/z* : (M)<sup>+</sup> Calc. for: C<sub>17</sub>H<sub>28</sub>NOS<sup>+</sup>, 294.1886. Found. 294.1893.

**[1,1'-biphenyl]-4-yl(butyl)(3-(methoxy(methyl)amino)-3-oxopropyl)sulfonium trifluoromethanesulfonate (3s):**

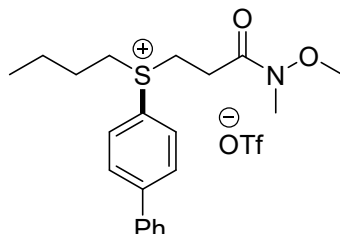

Colorless oily liquid. DCM/MeOH = 10 : 1, R<sub>f</sub> = 0.6. Yield: 89% (134.9 mg scale); <sup>1</sup>H NMR (400 MHz, CDCl<sub>3</sub>) δ 8.14 – 8.05 (m, 2H), 7.91 – 7.84 (m, 2H), 7.64 – 7.57 (m, 2H), 7.51 – 7.42 (m, 3H), 4.14 – 4.05 (m, 1H), 4.04 – 3.96 (m, 1H), 3.94 – 3.83 (m, 2H), 3.63 (s, 3H), 3.19 – 3.14 (m, 4H), 2.97 – 2.89 (m, 1H), 1.70 – 1.55 (m, 2H), 1.55 – 1.28 (m, 2H), 0.90 (t, *J* = 7.2 Hz, 3H).. <sup>13</sup>C NMR (101 MHz, CDCl<sub>3</sub>) δ 170.0, 147.9, 138.3, 132.2, 129.9, 129.3, 129.2, 127.4, 120.4, 61.6, 45.2, 41.8, 32.2, 27.6, 26.8, 21.4, 13.4. **HRMS (ESI)** *m/z* : (M)<sup>+</sup> Calc. for: C<sub>21</sub>H<sub>28</sub>NO<sub>2</sub>S<sup>+</sup>, 358.1835. Found. 358.1845.

**butyl(2-oxo-2-(pentylamino)ethyl)(phenyl)sulfonium trifluoromethanesulfonate (3t):**

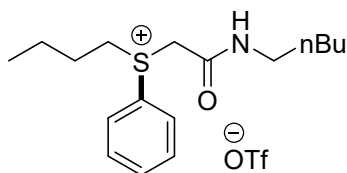

Colorless oily liquid. DCM/MeOH = 10 : 1, R<sub>f</sub> = 0.6. Yield: 86% (114.7 mg scale); <sup>1</sup>H NMR (400 MHz, CDCl<sub>3</sub>) δ 8.04 – 7.99 (m, 2H), 7.95 – 7.89 (m, 1H), 7.80 – 7.74 (m, 1H), 7.71 – 7.65 (m, 2H), 4.98 (d, *J* = 14.7 Hz, 1H), 4.74 (d, *J* = 14.7 Hz, 1H), 3.74 (t, *J* = 7.4 Hz, 2H),, 3.21 – 3.05 (m, 2H), 1.67 – 1.53 (m, 2H), 1.52 – 1.43 (m, 2H), 1.42 – 1.35 (m, 2H), 1.28 – 1.22 (m, 2H), 1.20 – 1.13 (m, 2H), 0.91 (t, *J* = 7.2 Hz, 3H), 0.83 (t, *J* = 7.1 Hz, 3H).. <sup>13</sup>C NMR (101 MHz, CDCl<sub>3</sub>) δ 161.3, 135.3, 131.6, 121.0, 49.1, 44.1, 40.5, 28.9, 28.6, 26.5, 22.3, 21.4, 14.0, 13.3. **HRMS (ESI)** *m/z* : (M)<sup>+</sup> Calc. for: C<sub>17</sub>H<sub>28</sub>NOS<sup>+</sup>, 294.1886. Found. 294.1884.

**butyl(2-oxo-2-(phenylamino)ethyl)(phenyl)sulfonium trifluoromethanesulfonate (3u):**

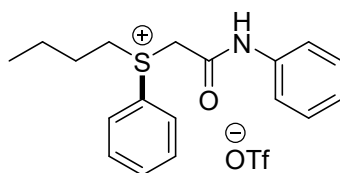

Yellow oily liquid. DCM/MeOH = 10 : 1, R<sub>f</sub> = 0.6. Yield: 80% (108.2 mg scale); <sup>1</sup>H NMR (400 MHz, CDCl<sub>3</sub>) δ 9.86 (s, 1H), 8.05 – 7.98 (m, 2H), 7.76 – 7.70 (m, 1H), 7.68 – 7.62 (m, 2H), 7.52 – 7.47 (m, 2H), 7.26 – 7.20 (m, 2H), 7.11 – 7.05 (m, 1H), 5.23 (d, *J* = 15.2 Hz, 1H),

4.95 (d,  $J = 15.2$  Hz, 1H), 3.81 – 3.74 (m, 2H), 1.65 – 1.52 (m, 2H), 1.47 – 1.43 (m, 2H), 0.88 (t,  $J = 7.2$  Hz, 3H).  $^{13}\text{C}$  NMR (101 MHz,  $\text{CDCl}_3$ )  $\delta$  159.9, 137.2, 135.4, 131.6, 131.5, 129.1, 125.3, 120.9, 120.3, 50.0, 44.3, 26.5, 21.4, 13.3. HRMS (ESI)  $m/z$  : (M)<sup>+</sup> Calc. for:  $\text{C}_{18}\text{H}_{22}\text{NOS}^+$ , 300.1417. Found. 300.1412.

**[1,1'-biphenyl]-4-yl(butyl)(2-(methoxy(methyl)amino)-2-oxoethyl)sulfonium trifluoromethanesulfonate (3v):**

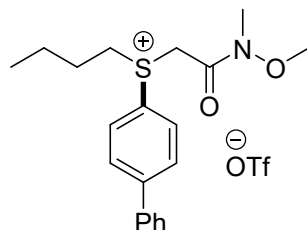

Colorless oily liquid. DCM/MeOH = 10 : 1,  $R_f = 0.6$ . Yield: 85% (126.2 mg scale);  $^1\text{H}$  NMR (400 MHz,  $\text{CDCl}_3$ )  $\delta$  8.21 – 8.13 (m, 2H), 7.90 – 7.83 (m, 2H), 7.63 – 7.56 (m, 2H), 7.51 – 7.40 (m, 3H), 5.43 (d,  $J = 16.7$  Hz, 1H), 5.03 (d,  $J = 16.7$  Hz, 1H), 4.10 – 4.01 (m, 1H), 3.95 – 3.86 (m, 1H), 3.82 (s, 3H), 3.16 (s, 3H), 1.67 – 1.54 (m, 2H), 1.53 – 1.44 (m, 2H), 0.90 (t,  $J = 7.2$  Hz, 3H).  $^{13}\text{C}$  NMR (101 MHz,  $\text{CDCl}_3$ )  $\delta$  163.2, 148.0, 138.3, 132.2, 129.9, 129.3, 129.2, 127.4, 119.7, 62.4, 50.0, 43.8, 32.3, 26.6, 21.3, 13.3. HRMS (ESI)  $m/z$  : (M)<sup>+</sup> Calc. for:  $\text{C}_{20}\text{H}_{26}\text{NO}_2\text{S}^+$ , 344.1679. Found. 344.1688.

**cyclopentyl(3-oxo-3-(pentylamino)propyl)(phenyl)sulfonium trifluoromethanesulfonate (3w):**

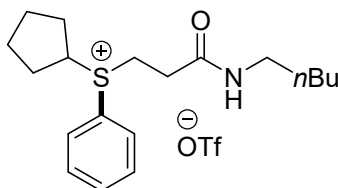

Colorless oily liquid. DCM/MeOH = 10 : 1,  $R_f = 0.3$ . Yield: 77% (107.8 mg scale);  $^1\text{H}$  NMR (400 MHz,  $\text{CDCl}_3$ )  $\delta$  7.99 – 7.91 (m, 2H), 7.75 – 7.68 (m, 1H), 7.66 – 7.58 (m, 2H), 7.26 – 7.20 (m, 1H), 4.51 – 4.40 (m, 1H), 4.01 – 3.92 (m, 1H), 3.89 – 3.79 (m, 1H), 3.10 – 3.02 (m, 2H), 2.85 – 2.76 (m, 1H), 2.49 – 2.45 (m, 1H), 2.43 – 2.34 (m, 1H), 2.03 – 1.92 (m, 1H), 1.89 – 1.77 (m, 3H), 1.72 – 1.61 (m, 2H), 1.51 – 1.37 (m, 3H), 1.25 – 1.16 (m, 4H), 0.81 (t,  $J = 7.0$  Hz, 3H).  $^{13}\text{C}$  NMR (101 MHz,  $\text{CDCl}_3$ )  $\delta$  168.7, 134.9, 131.9, 131.3, 122.1, 56.6, 40.8, 39.8, 30.6, 29.9, 29.8, 29.0, 28.8, 25.4, 24.8, 22.3, 13.9. HRMS (ESI)  $m/z$  : (M)<sup>+</sup> Calc. for:  $\text{C}_{19}\text{H}_{30}\text{NOS}^+$ , 320.2043. Found. 320.2049.

**(3-methoxypropyl)(3-oxo-3-(pentylamino)propyl)(phenyl)sulfonium trifluoromethanesulfonate (3x):**

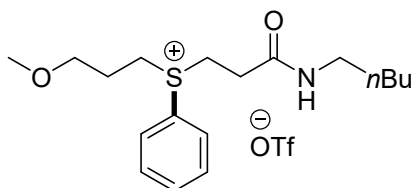

Yellow oily liquid. DCM/MeOH = 10 : 1,  $R_f = 0.3$ . Yield: 99% (141.3 mg scale);  $^1\text{H}$  NMR (400 MHz,  $\text{CDCl}_3$ )  $\delta$  7.94 – 7.88 (m, 2H), 7.72 – 7.66 (m, 1H), 7.64 – 7.58 (m, 2H), 7.26 – 7.20 (m, 1H), 3.96 – 3.74 (m, 4H), 3.45 – 3.35 (m, 2H), 3.19 (s, 3H), 3.09 – 3.01 (m, 2H), 2.86 –

2.76 (m, 1H), 2.64 – 2.56 (m, 1H), 1.93 – 1.79 (m, 2H), 1.45 – 1.34 (m, 2H), 1.24 – 1.16 (m, 4H), 0.80 (t,  $J = 7.0$  Hz, 3H).  $^{13}\text{C}$  NMR (101 MHz,  $\text{CDCl}_3$ )  $\delta$  168.7, 134.7, 131.5, 131.2, 122.4, 69.8, 58.5, 42.8, 42.3, 39.8, 30.2, 29.0, 28.8, 25.1, 22.3, 13.9. HRMS (ESI)  $m/z$  : (M)<sup>+</sup> Calc. for:  $\text{C}_{18}\text{H}_{30}\text{NO}_2\text{S}^+$ , 324.1992. Found. 324.2006.

**butyl(3-(((S)-1-ethoxy-4-methyl-1-oxopentan-2-yl)amino)-3-oxopropyl)(phenyl)sulfonium trifluoromethanesulfonate (3y):**

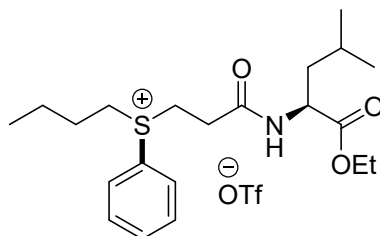

Colorless oily liquid. DCM/MeOH = 10 : 1,  $R_f = 0.5$ . Yield: 82% (130.2 mg scale);  $^1\text{H}$  NMR (400 MHz,  $\text{CDCl}_3$ )  $\delta$  8.00 – 7.91 (m, 2H), 7.76 – 7.69 (m, 1H), 7.68 – 7.61 (m, 2H), 7.55 – 7.43 (m, 1H), 4.38 – 4.28 (m, 1H), 4.14 – 4.06 (m, 2H), 4.05 – 3.96 (m, 1H), 3.89 – 3.81 (m, 1H), 3.80 – 3.71 (m, 2H), 3.00 – 2.88 (m, 1H), 2.79 – 2.68 (m, 1H), 1.64 – 1.50 (m, 4H), 1.49 – 1.36 (m, 3H), 1.23 – 1.17 (m, 3H), 0.90 – 0.81 (m, 9H).  $^{13}\text{C}$  NMR (101 MHz,  $\text{CDCl}_3$ )  $\delta$  172.5 (d,  $J = 6.0$  Hz), 169.3 (d,  $J = 12.0$  Hz), 134.9 (d,  $J = 2.3$  Hz), 131.5, 131.4 (d,  $J = 2.1$  Hz), 121.8 (d,  $J = 13.7$  Hz), 61.2 (d,  $J = 4.2$  Hz), 51.5 (d,  $J = 2.3$  Hz), 43.9 (d,  $J = 2.3$  Hz), 42.0 (d,  $J = 2.8$  Hz), 40.2 (d,  $J = 5.9$  Hz), 30.0, 26.6, 24.7, 22.7, 21.6 (d,  $J = 5.1$  Hz), 21.2, 14.1, 13.3. HRMS (ESI)  $m/z$  : (M)<sup>+</sup> Calc. for:  $\text{C}_{21}\text{H}_{34}\text{NO}_3\text{S}^+$ , 380.2254. Found. 380.2266.

**butyl(3-(((S)-1,5-diethoxy-1,5-dioxopentan-2-yl)amino)-3-oxopropyl)(phenyl)sulfonium trifluoromethanesulfonate (3z):**

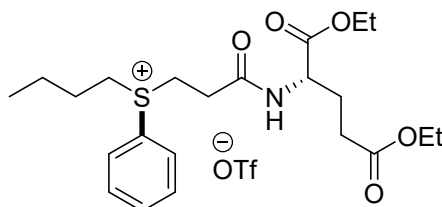

Colorless oily liquid. DCM/MeOH = 10 : 1,  $R_f = 0.4$ . Yield: 80% (137.4 mg scale);  $^1\text{H}$  NMR (400 MHz,  $\text{CDCl}_3$ )  $\delta$  8.00 – 7.92 (m, 2H), 7.75 – 7.69 (m, 1H), 7.67 – 7.62 (m, 2H), 7.62 – 7.55 (m, 1H), 4.41 – 4.33 (m, 1H), 4.14 – 4.03 (m, 4H), 4.03 – 3.96 (m, 1H), 3.91 – 3.81 (m, 1H), 3.80 – 3.72 (m, 2H), 3.00 – 2.89 (m, 1H), 2.80 – 2.67 (m, 1H), 2.40 – 2.29 (m, 2H), 2.18 – 2.07 (m, 1H), 2.01 – 1.88 (m, 1H), 1.61 – 1.51 (m, 1H), 1.50 – 1.37 (m, 3H), 1.23 – 1.16 (m, 6H), 0.84 (t,  $J = 7.2$  Hz, 3H).  $^{13}\text{C}$  NMR (101 MHz,  $\text{CDCl}_3$ )  $\delta$  172.7 (d,  $J = 7.8$  Hz), 171.3 (d,  $J = 3.6$  Hz), 169.3 (d,  $J = 9.5$  Hz), 135.0 (s), 131.6 (s), 131.4 (s), 121.7 (d,  $J = 10.1$  Hz), 61.5 (d,  $J = 3.6$  Hz), 60.6 (d,  $J = 1.8$  Hz), 52.2 (d,  $J = 4.0$  Hz), 43.9 (s), 41.8 (s), 30.3 (s), 30.0 (s), 26.6 (s), 26.4 (s), 21.2 (s), 14.1 (s), 14.0 (s), 13.3 (s). HRMS (ESI)  $m/z$  : (M)<sup>+</sup> Calc. for:  $\text{C}_{22}\text{H}_{34}\text{NO}_5\text{S}^+$ , 424.2152. Found. 424.2159.

**(3-(((S)-1,5-diethoxy-1,5-dioxopentan-2-yl)amino)-3-oxopropyl)(2-hydroxyethyl)(phenyl)sulfonium trifluoromethanesulfonate (3aa):**

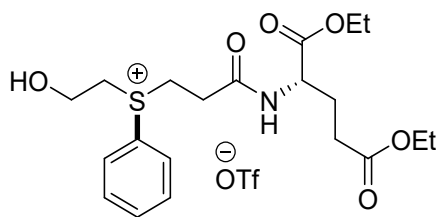

Yellow oily liquid. DCM/MeOH = 10 : 1, Rf = 0.4. Yield: 72% (121.2 mg scale);  $^1\text{H NMR}$  (400 MHz,  $\text{CDCl}_3$ )  $\delta$  8.00 – 7.89 (m, 2H), 7.75 – 7.68 (m, 1H), 7.67 – 7.59 (m, 2H), 7.57 – 7.46 (m, 1H), 4.71 – 4.47 (m, 1H), 4.44 – 4.32 (m, 1H), 4.12 – 4.03 (m, 6H), 3.91 – 3.70 (m, 3H), 3.07 (br, 1H), 2.96 – 2.86 (m, 1H), 2.79 – 2.66 (m, 1H), 2.38 – 2.27 (m, 2H), 2.15 – 2.03 (m, 1H), 1.99 – 1.86 (m, 1H), 1.23 – 1.16 (m, 6H).  $^{13}\text{C NMR}$  (101 MHz,  $\text{CDCl}_3$ )  $\delta$  172.9 (d,  $J = 11.5$  Hz), 171.6 (d,  $J = 11.6$  Hz), 169.3 (d,  $J = 8.0$  Hz), 134.8, 131.6, 131.3, 122.1, 61.7 (d,  $J = 7.7$  Hz), 60.8, 56.5, 52.2, 48.7, 41.3, 30.3, 30.2, 26.5, 14.1, 14.0. **HRMS (ESI)**  $m/z$  : (M) $^+$  Calc. for:  $\text{C}_{20}\text{H}_{30}\text{NO}_6\text{S}^+$ , 412.1788. Found. 412.1800.

**(2-hydroxyethyl)(3-(indolin-1-yl)-3-oxopropyl)(phenyl)sulfonium trifluoromethanesulfonate (3ab):**

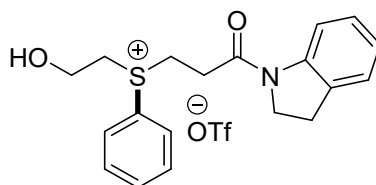

Thioether (0.3 mmol) and boronic acid (0.6 mmol) were used for this reaction. Yellow oily liquid. DCM/MeOH = 10 : 1, Rf = 0.3. Yield: 77% (110.8 mg scale);  $^1\text{H NMR}$  (400 MHz,  $\text{CDCl}_3$ )  $\delta$  8.10 – 7.86 (m, 3H), 7.71 – 7.65 (m, 1H), 7.64 – 7.57 (m, 2H), 7.17 – 7.01 (m, 2H), 6.99 – 6.91 (m, 1H), 4.56 (s, 1H), 4.30 – 4.14 (m, 2H), 4.13 – 4.05 (m, 1H), 3.99 – 3.89 (m, 1H), 3.87 – 3.67 (m, 4H), 3.12 – 2.91 (m, 3H), 2.89 – 2.70 (m, 1H).  $^{13}\text{C NMR}$  (101 MHz,  $\text{CDCl}_3$ )  $\delta$  167.0, 142.2, 134.7, 131.7, 131.6, 131.3, 127.4, 124.9, 124.4, 122.7, 116.7, 56.6, 49.3, 47.8, 41.3, 30.9, 27.8. **HRMS (ESI)**  $m/z$  : (M) $^+$  Calc. for:  $\text{C}_{19}\text{H}_{22}\text{NO}_2\text{S}^+$ , 328.1366. Found. 328.1370.

**(3-(((S)-1-ethoxy-4-methyl-1-oxopentan-2-yl)amino)-3-oxopropyl)(2-hydroxyethyl)(phenyl)sulfonium trifluoromethanesulfonate (3ac):**

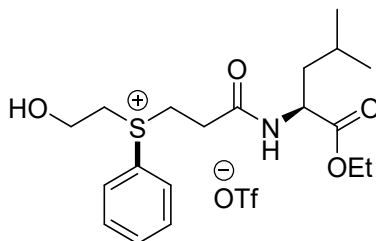

Colorless oily liquid. DCM/MeOH = 10 : 1, Rf = 0.2. Yield: 82% (127.2 mg scale);  $^1\text{H NMR}$  (400 MHz,  $\text{CDCl}_3$ )  $\delta$  8.00 – 7.89 (m, 2H), 7.75 – 7.68 (m, 1H), 7.67 – 7.60 (m, 2H), 7.39 – 7.26 (m, 1H), 4.51 (br, 1H), 4.39 – 4.30 (m, 1H), 4.14 – 4.05 (m, 4H), 3.92 – 3.83 (m, 1H), 3.82 – 3.69 (m, 2H), 2.95 – 2.85 (m, 1H), 2.80 – 2.69 (m, 1H), 1.67 – 1.57 (m, 1H), 1.56 – 1.51 (m, 2H), 1.27 – 1.17 (m, 4H), 0.90 – 0.81 (m, 6H).  $^{13}\text{C NMR}$  (101 MHz,  $\text{CDCl}_3$ )  $\delta$  172.9 (d,  $J = 14.9$  Hz), 169.2 (d,  $J = 10.6$  Hz), 134.8 (d,  $J = 2.9$  Hz), 131.5, 131.4, 122.2 (d,  $J = 4.7$  Hz), 61.4 (d,  $J = 9.0$  Hz), 56.5 (d,  $J = 3.8$  Hz), 51.5 (d,  $J = 5.2$  Hz), 48.6 (d,  $J = 9.7$  Hz), 41.4 (d,  $J = 6.1$

Hz), 40.4 (d,  $J = 6.3$  Hz), 30.2 (d,  $J = 10.3$  Hz), 24.8, 22.7 (d,  $J = 2.5$  Hz), 21.7 (d,  $J = 8.5$  Hz), 14.1. **HRMS (ESI) m/z** : (M)<sup>+</sup> Calc. for: C<sub>19</sub>H<sub>30</sub>NO<sub>4</sub>S<sup>+</sup>, 368.1890. Found. 368.1898.

**bis(2-oxo-2-(pentylamino)ethyl)(phenyl)sulfonium trifluoromethanesulfonate (3ad)** :

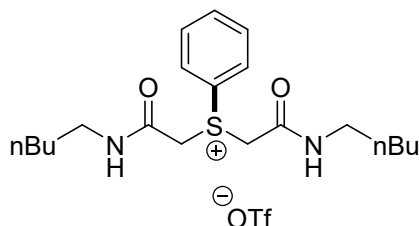

Colorless oily liquid. DCM/MeOH = 10 : 1, R<sub>f</sub> = 0.7. Yield: 86% (133.1 mg scale); **<sup>1</sup>H NMR** (400 MHz, CDCl<sub>3</sub>) δ 8.06 – 8.00 (m, 2H), 7.72 – 7.65 (m, 3H), 7.62 – 7.56 (m, 2H), 4.93 – 4.77 (m, 4H), 3.13 – 2.99 (m, 4H), 1.35 – 1.27 (m, 4H), 1.21 – 1.13 (m, 4H), 1.11 – 1.03 (m, 4H), 0.81 – 0.74 (m, 6H). **<sup>13</sup>C NMR** (101 MHz, CDCl<sub>3</sub>) δ 161.7, 134.6, 131.2, 130.9, 122.4, 48.5, 40.3, 28.7, 28.5, 22.2, 13.8.; **HRMS (ESI) m/z**: (M)<sup>+</sup> Calc. for: C<sub>20</sub>H<sub>33</sub>N<sub>2</sub>O<sub>2</sub>S<sup>+</sup>, 365.2257. Found. 365.2275.

**(5R,15S)-10-([1,1'-biphenyl]-4-yl)-15-(ethoxycarbonyl)-5-isopropyl-3,6,13,18-tetraoxo-1-phenyl-2,7,19-trioxa-10-thia-4,14-diazahenicosan-10-ium trifluoromethanesulfonate (3ae)**:

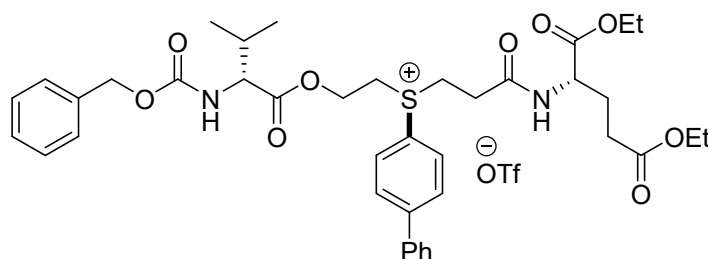

Colorless oily liquid. DCM/MeOH = 10 : 1, R<sub>f</sub> = 0.3. Yield: 71% (184.2 mg scale); **<sup>1</sup>H NMR** (400 MHz, *d*-DMSO) δ 8.51 (d,  $J = 7.5$  Hz, 1H), 8.18 – 7.99 (m, 3H), 7.82 – 7.62 (m, 3H), 7.57 – 7.41 (m, 3H), 7.38 – 7.23 (m, 6H), 5.06 – 4.99 (m, 2H), 4.35 – 4.14 (m, 4H), 4.11 – 3.96 (m, 6H), 3.86 – 3.73 (m, 1H), 2.83 – 2.69 (m, 1H), 2.61 – 2.49 (m, 1H), 2.38 – 2.23 (m, 2H), 2.00 – 1.69 (m, 4H), 1.19 – 1.08 (m, 6H), 0.88 – 0.71 (m, 6H). **<sup>13</sup>C NMR** (101 MHz, *d*-DMSO) δ 172.0, 171.3, 168.8, 164.8, 156.4, 146.0, 137.7, 136.9, 132.5, 131.0, 129.2, 129.1, 129.0, 128.8, 128.4, 127.9, 127.8, 127.3, 127.2, 126.4, 126.0, 65.7, 60.7, 60.6, 60.0, 59.4, 58.9, 51.4, 51.3, 29.8, 29.4, 29.2, 26.1, 18.9, 17.9, 14.0, 13.9. **HRMS (ESI) m/z** : (M)<sup>+</sup> Calc. for: C<sub>39</sub>H<sub>49</sub>N<sub>2</sub>O<sub>9</sub>S<sup>+</sup>, 721.3153. Found. 721.3158.

**(5S)-15-(4-(4-chlorobenzoyl)phenoxy)-5-isobutyl-15-methyl-4,7,14-trioxa-10-phenyl-3,13-dioxa-10-thia-6-azahexadecan-10-ium trifluoromethanesulfonate (3af)**:

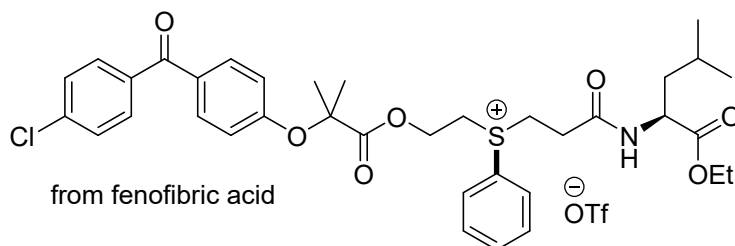

Yellow oily liquid. DCM/MeOH = 10 : 1, R<sub>f</sub> = 0.4. Yield: 93% (227.1 mg scale); <sup>1</sup>H NMR (400 MHz, CDCl<sub>3</sub>) δ 7.90 – 7.83 (m, 2H), 7.73 – 7.67 (m, 5H), 7.64 – 7.56 (m, 2H), 7.45 – 7.43 (m, 1H), 7.43 – 7.41 (m, 1H), 6.82 – 6.80 (m, 1H), 6.80 – 6.77 (m, 1H), 4.63 – 4.55 (m, 1H), 4.39 – 4.30 (m, 1H), 4.26 – 4.18 (m, 2H), 4.12 – 4.07 (m, 2H), 3.94 – 3.84 (m, 1H), 3.04 – 2.92 (m, 1H), 2.78 – 2.67 (m, 1H), 1.72 – 1.62 (m, 1H), 1.60 – 1.51 (m, 8H), 1.28 – 1.17 (m, 6H), 0.90 – 0.81 (m, 6H). <sup>13</sup>C NMR (101 MHz, CDCl<sub>3</sub>) δ 194.3 , 173.1 , 172.6 (d, *J* = 11.6 Hz), 169.2 (d, *J* = 15.2 Hz), 159.3 , 138.7 , 136.2 , 135.1 (d, *J* = 4.9 Hz), 132.2 , 131.7 , 131.5 (d, *J* = 3.4 Hz), 131.3 , 130.9 , 128.7 , 117.6 , 79.3 , 61.3 (d, *J* = 6.5 Hz), 59.3 (d, *J* = 6.0 Hz), 51.5 (d, *J* = 5.6 Hz), 44.4 (d, *J* = 5.8 Hz), 42.5 (d, *J* = 9.4 Hz), 40.4 (d, *J* = 12.4 Hz), 30.1, 29.8, 25.5 (d, *J* = 9.3 Hz), 25.1 (d, *J* = 10.9 Hz), 24.8, 22.7 (d, *J* = 2.6 Hz), 21.7 (d, *J* = 11.3 Hz), 14.2. HRMS (ESI) *m/z* : (M)<sup>+</sup> Calc. for: C<sub>36</sub>H<sub>43</sub>ClNO<sub>7</sub>S<sup>+</sup>, 668.2443. Found. 668.2458.

**(2-hydroxyethyl)(2-(((1R,4aS,10aR)-7-isopropyl-1,4a-dimethyl-1,2,3,4,4a,9,10,10a-octahydrophenanthren-1-yl)methyl)amino)-2-oxoethyl)(phenyl)sulfonium trifluoromethanesulfonate (3ag):**

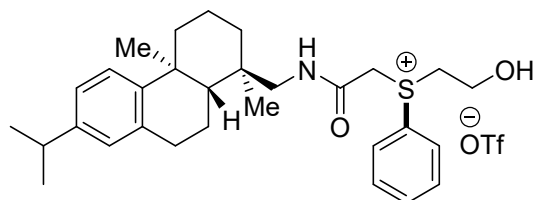

White solid. DCM/MeOH = 10 : 1, R<sub>f</sub> = 0.5. Yield: 83% (156.9 mg scale); <sup>1</sup>H NMR (400 MHz, CDCl<sub>3</sub>) δ 8.00 – 7.89 (m, 2H), 7.66 – 7.51 (m, 3H), 7.43 – 7.35 (m, 1H), 7.14 – 7.05 (m, 1H), 7.01 – 6.93 (m, 1H), 6.89 – 6.75 (m, 1H), 4.99 – 4.83 (m, 2H), 4.12 – 3.98 (m, 2H), 3.74 (br, 4H), 2.97 – 2.67 (m, 4H), 2.25 – 2.11 (m, 1H), 1.80 – 1.67 (m, 1H), 1.65 – 1.50 (m, 3H), 1.28 – 1.19 (m, 8H), 1.15 – 1.07 (m, 4H), 1.01 – 0.93 (m, 1H), 0.82 (s, 1H), 0.68 (s, 2H). <sup>13</sup>C NMR (101 MHz, CDCl<sub>3</sub>) δ 162.1, 147.1, 145.7, 145.5, 134.8, 131.3, 131.1, 127.0, 124.2, 123.9, 121.6, 56.4, 51.4, 48.1, 45.9, 38.3, 37.7, 37.4, 36.0, 33.5, 30.0, 29.8, 25.3, 24.1, 24.0, 19.1, 18.5, 17.9. [The product was obtained as a mixture of isomers, and the NMR spectra are complex (see the provided spectra). <sup>1</sup>H NMR integrations are reported for the mixture, while only the major isomer is annotated in the <sup>13</sup>C NMR spectrum]. HRMS (ESI) *m/z* : (M)<sup>+</sup> Calc. for: C<sub>30</sub>H<sub>42</sub>NO<sub>2</sub>S<sup>+</sup>, 480.2931. Found. 480.2938.

**(5S)-17-([1,1'-biphenyl]-4-yl)-5-isobutyl-4,7,14,17-tetraoxo-10-phenyl-3,13-dioxo-10-thia-6-azaheptadecan-10-ium trifluoromethanesulfonate (3ah):**

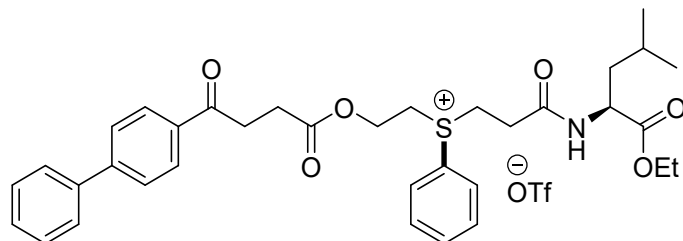

Colorless oily liquid. DCM/MeOH = 10 : 1, R<sub>f</sub> = 0.4. Yield: 90% (203.4 mg scale); <sup>1</sup>H NMR (400 MHz, CDCl<sub>3</sub>) δ 8.06 – 7.98 (m, 4H), 7.73 – 7.63 (m, 5H), 7.62 – 7.58 (m, 2H), 7.52 – 7.35 (m, 4H), 4.59 – 4.49 (m, 1H), 4.43 – 4.33 (m, 1H), 4.29 – 4.20 (m, 2H), 4.19 – 4.13 (m, 2H), 4.12 – 4.06 (m, 2H), 4.01 – 3.91 (m, 1H), 3.30 – 3.23 (m, 2H), 3.08 – 2.94 (m, 1H), 2.83 – 2.72 (m, 1H), 2.64 – 2.56 (m, 2H), 1.68 – 1.60 (m, 1H), 1.59 – 1.52 (m, 2H), 1.22 – 1.17 (m, 3H), 0.90 – 0.82 (m, 6H). <sup>13</sup>C NMR (101 MHz, CDCl<sub>3</sub>) δ 197.7 (d, *J* = 2.0 Hz), 172.6 (d, *J* = 9.1

Hz), 172.4, 169.2 (d,  $J = 11.4$  Hz), 146.1, 139.7, 135.0, 131.7, 131.3 (d,  $J = 2.0$  Hz), 129.0, 128.7, 128.4, 127.3, 127.2, 122.2, 122.0 (d,  $J = 11.1$  Hz), 61.2 (d,  $J = 6.8$  Hz), 58.2, 51.5 (d,  $J = 6.3$  Hz), 44.8, 41.9, 40.3 (d,  $J = 6.9$  Hz), 33.3, 30.1, 27.8, 24.7, 22.7 (d,  $J = 2.3$  Hz), 21.7 (d,  $J = 9.6$  Hz), 14.1. **HRMS (ESI)**  $m/z$ : (M)<sup>+</sup> Calc. for: C<sub>35</sub>H<sub>42</sub>NO<sub>6</sub>S<sup>+</sup>, 604.2727. Found. 604.2746.

**butyl(3-(((2-(4-isobutylphenyl)propanoyl)oxy)methyl)phenyl)(3-oxo-3-(pentylamino)propyl)sulfonium trifluoromethanesulfonate (3ai):**

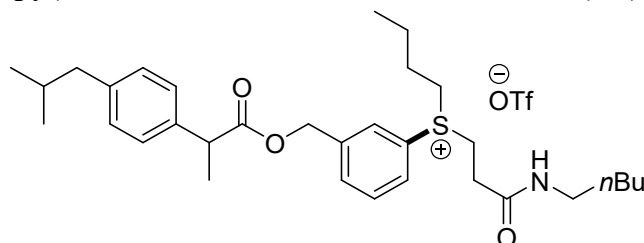

Colorless oily liquid. DCM/MeOH = 10 : 1, R<sub>f</sub> = 0.4. Yield: 74% (150.4 mg scale); **<sup>1</sup>H NMR** (400 MHz, CDCl<sub>3</sub>) δ 7.92 – 7.87 (m, 1H), 7.79 (s, 1H), 7.57 – 7.51 (m, 1H), 7.48 – 7.43 (m, 1H), 7.35 – 7.30 (m, 1H), 7.19 – 7.14 (m, 2H), 7.09 – 7.04 (m, 2H), 5.20 – 5.14 (m, 2H), 4.02 – 3.93 (m, 1H), 3.85 – 3.66 (m, 4H), 3.13 – 3.05 (m, 2H), 2.92 – 2.83 (m, 1H), 2.72 – 2.64 (m, 1H), 2.43 – 2.39 (m, 2H), 1.86 – 1.76 (m, 1H), 1.51 – 1.46 (m, 4H), 1.45 – 1.36 (m, 5H), 1.27 – 1.19 (m, 4H), 0.88 – 0.81 (m, 12H). **<sup>13</sup>C NMR** (101 MHz, CDCl<sub>3</sub>) δ 174.2, 168.8, 140.8, 140.2, 137.4, 137.3, 133.5, 131.5, 130.6, 130.3, 130.2, 129.4, 127.2, 122.4, 64.6, 45.0, 44.1, 44.0, 42.2, 39.8, 30.2, 29.0, 28.8, 26.6, 22.4, 22.3, 21.3, 18.3, 13.9, 13.2. **HRMS (ESI)**  $m/z$ : (M)<sup>+</sup> Calc. for: C<sub>32</sub>H<sub>48</sub>NO<sub>3</sub>S<sup>+</sup>, 526.3349. Found. 526.3384.

**butyl(3-oxo-3-(pentylamino)propyl)(3-(((2-(11-oxo-6,11-dihydrodibenzo[b,e]oxepin-2-yl)acetoxy)methyl)phenyl)sulfonium trifluoromethanesulfonate (3aj):**

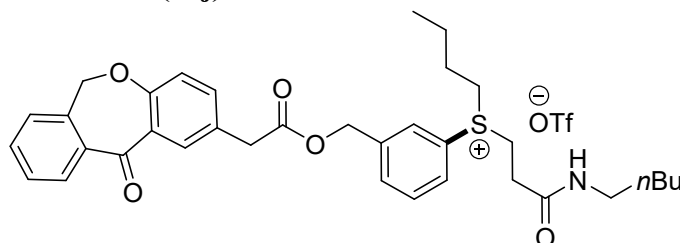

Colorless oily liquid. DCM/MeOH = 10 : 1, R<sub>f</sub> = 0.5. Yield: 65% (144.3 mg scale); **<sup>1</sup>H NMR** (400 MHz, CDCl<sub>3</sub>) δ 8.09 – 8.05 (m, 1H), 7.96 – 7.89 (m, 2H), 7.84 – 7.78 (m, 1H), 7.67 – 7.59 (m, 2H), 7.55 – 7.50 (m, 1H), 7.46 – 7.38 (m, 2H), 7.35 – 7.27 (m, 2H), 7.01 – 6.97 (m, 1H), 5.20 (s, 2H), 5.14 (s, 2H), 4.05 – 3.95 (m, 1H), 3.91 – 3.82 (m, 1H), 3.81 – 3.73 (m, 2H), 3.71 (s, 2H), 3.11 – 3.04 (m, 2H), 2.94 – 2.84 (m, 1H), 2.73 – 2.65 (m, 1H), 1.60 – 1.45 (m, 2H), 1.44 – 1.36 (m, 4H), 1.25 – 1.18 (m, 4H), 0.85 – 0.79 (m, 6H). **<sup>13</sup>C NMR** (101 MHz, CDCl<sub>3</sub>) δ 190.8, 171.1, 168.8, 160.6, 140.3, 139.9, 136.5, 135.6, 134.1, 133.0, 132.4, 131.6, 131.0, 130.6, 129.4, 129.3, 127.9, 127.4, 125.2, 122.6, 121.2, 73.6, 65.1, 44.2, 42.2, 40.0, 39.8, 30.2, 29.0, 28.8, 26.6, 22.3, 21.3, 13.9, 13.2. **HRMS (ESI)**  $m/z$ : (M)<sup>+</sup> Calc. for: C<sub>35</sub>H<sub>42</sub>NO<sub>5</sub>S<sup>+</sup>, 588.2778. Found. 588.2788.

**dihexyl(phenyl)sulfonium trifluoromethanesulfonate (3a'):**

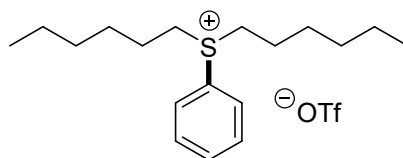

Colorless oily liquid. DCM/MeOH = 10 : 1,  $R_f$  = 0.7. Yield: 39% (49.7 mg scale);  $^1\text{H NMR}$  (400 MHz,  $\text{CDCl}_3$ )  $\delta$  8.02 – 7.96 (m, 2H), 7.81 – 7.74 (m, 1H), 7.74 – 7.66 (m, 2H), 3.86 – 3.73 (m, 4H), 1.67 – 1.57 (m, 2H), 1.56 – 1.47 (m, 2H), 1.44 – 1.36 (m, 4H), 1.24 – 1.16 (m, 8H), 0.84 – 0.76 (m, 6H).;  $^{13}\text{C NMR}$  (101 MHz,  $\text{CDCl}_3$ )  $\delta$  135.1, 131.7, 131.6, 121.1, 44.6, 31.0, 27.7, 24.7, 22.2, 13.8.; **HRMS (ESI)**  $m/z$  : (M)<sup>+</sup> Calc. for:  $\text{C}_{18}\text{H}_{31}\text{S}^+$ , 279.2141. Found. 279.2148.

**butyl(3-ethoxy-3-oxopropyl)(phenyl)sulfonium trifluoromethanesulfonate (3a'')**:

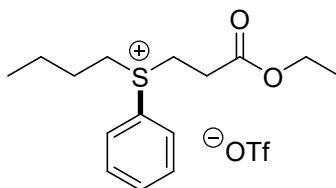

Yellow oily liquid. DCM/MeOH = 10 : 1,  $R_f$  = 0.7. Yield: 61% (75.6 mg scale);  $^1\text{H NMR}$  (400 MHz,  $\text{CDCl}_3$ )  $\delta$  8.06 – 7.96 (m, 2H), 7.80 – 7.73 (m, 1H), 7.72 – 7.64 (m, 2H), 4.12 – 4.04 (m, 3H), 4.02 – 3.94 (m, 1H), 3.90 – 3.80 (m, 2H), 2.90 – 2.80 (m, 1H), 2.76 – 2.66 (m, 1H), 1.67 – 1.56 (m, 1H), 1.54 – 1.39 (m, 3H), 1.23 – 1.16 (m, 3H), 0.89 – 0.83 (m, 6H).;  $^{13}\text{C NMR}$  (101 MHz,  $\text{CDCl}_3$ )  $\delta$  169.9, 135.2, 131.8, 131.6, 121.3, 61.9, 44.8, 40.7, 29.4, 26.6, 21.3, 14.0, 13.3.; **HRMS (ESI)**  $m/z$  : (M)<sup>+</sup> Calc. for:  $\text{C}_{15}\text{H}_{23}\text{O}_2\text{S}^+$ , 267.1413. Found. 267.1419.

## 5. UV absorption and Thermogravimetric analysis of 3a, 3d, 3e, 3t:

1) The four aryl sulfonium salts were dissolved in acetonitrile to prepare solutions at a concentration of  $2.0 \times 10^{-5}$  mol/L. UV absorption spectra were measured over a scanning range of 190 - 400 nm using a Hitachi UH5300 double-beam UV-vis spectrophotometer.

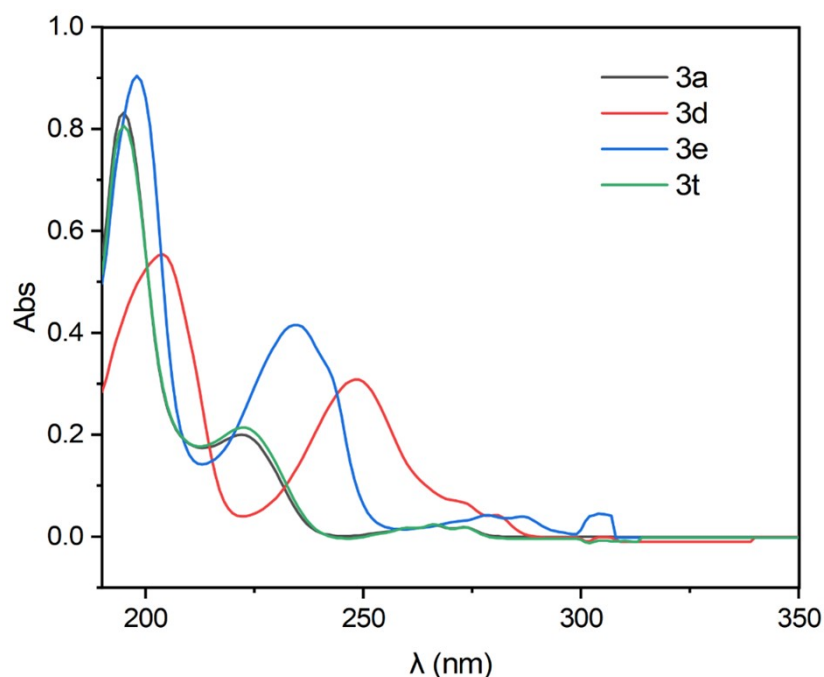

| compounds | UV                    |              |
|-----------|-----------------------|--------------|
|           | $\lambda_{\max}$ (nm) | Abs          |
| <b>3a</b> | 195                   | 0.832        |
| <b>3d</b> | 204, 248              | 0.554, 0.308 |
| <b>3e</b> | 198, 235              | 0.904, 0.415 |
| <b>3t</b> | 195                   | 0.806        |

2) The TGA measurements were performed on a Netzsch TG209 instrument under a nitrogen atmosphere. The temperature range was set from 30 °C to 500 °C with a heating rate of 10 K/min. The TGA curves illustrate the weight changes of the samples as a function of temperature.

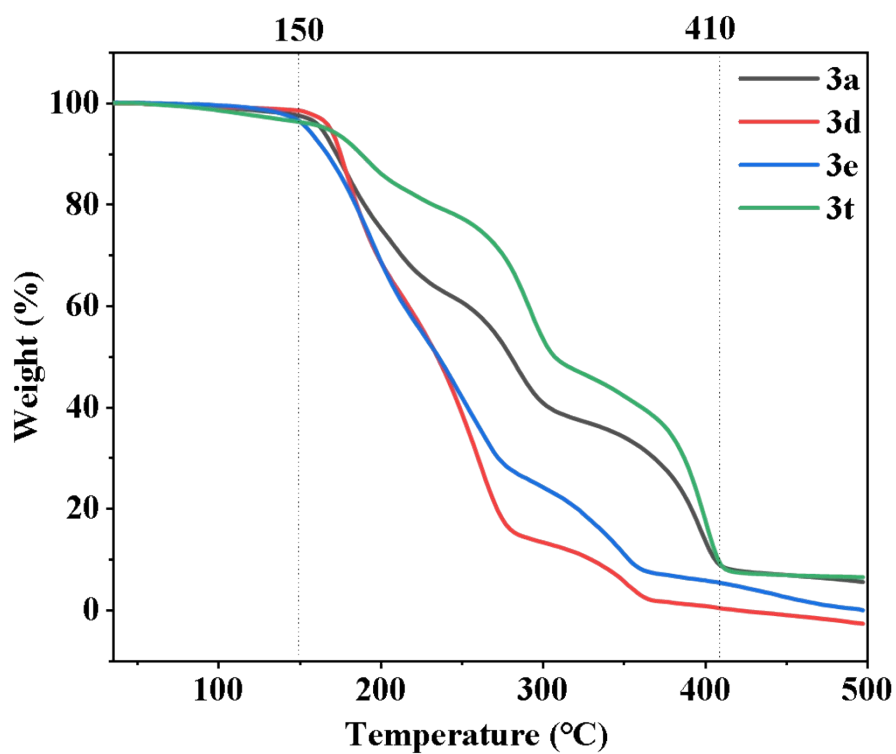


---

TGA

---

| compounds | <sup>a</sup> T <sub>2wt%</sub> /°C | <sup>b</sup> T <sub>5wt%</sub> /°C | <sup>c</sup> T <sub>50wt%</sub> /°C | residual mass<br>T <sub>500°C</sub> /wt% |
|-----------|------------------------------------|------------------------------------|-------------------------------------|------------------------------------------|
| <b>3a</b> | 140.74                             | 163.37                             | 280.10                              | 5.53                                     |
| <b>3d</b> | 155.59                             | 168.71                             | 234.62                              | 0.16                                     |
| <b>3e</b> | 137.74                             | 154.41                             | 235.13                              | 0.14                                     |
| <b>3t</b> | 112.40                             | 166.37                             | 307.00                              | 6.47                                     |

<sup>a</sup>weight loss of 2%. <sup>b</sup>weight loss of 5%. <sup>c</sup>weight loss of 10%

## 6. Proposed mechanism

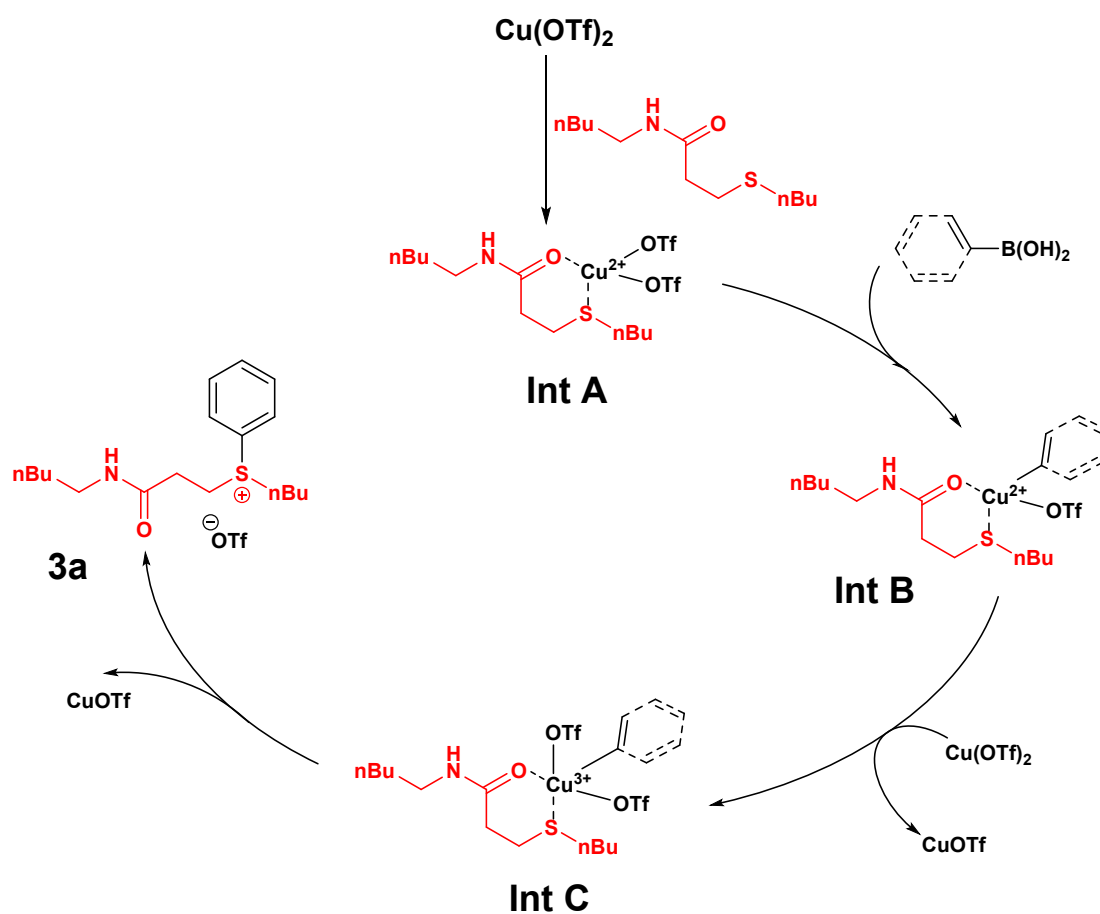

Based on the previous studies,<sup>2</sup> the synergistic coordination of both the thioether and the amide to copper is crucial for facilitating the transformation, or at least helps avoid the use of high loadings of the thioether. After transmetalation with boron compounds, disproportionation of **Int B** with another  $\text{Cu}^{2+}$  species is suggested to generate  $\text{Cu}^{3+}$  species **Int C**, followed by reductive elimination to form the sulfonium salt **3a**.

## 7. Reference:

- (1) Li, Y.; Han, D.; Luo, Z.; Lv, X.; Liu, B. The Chan–Lam-Type Synthesis of Thioimidazolium Salts for Thiol–(Hetero)arene Conjugation. *Chem. Commun.* **2024**, *60*, 4675.
- (2) Wang, G.; Han, D.; Li, Y.; Nie, Y.; Muthusamy, S.; Luo, Z.; Liu, B. Copper-Mediated Deconstructive Ring Cleavage of Cyclic Thioethers with Boron Compounds. *Org. Lett.* **2023**, *25*, 3522–3526.

## Spectra Data

$^1\text{H}$  NMR spectrum of **3a** ( $\text{CDCl}_3$ , 400 MHz)

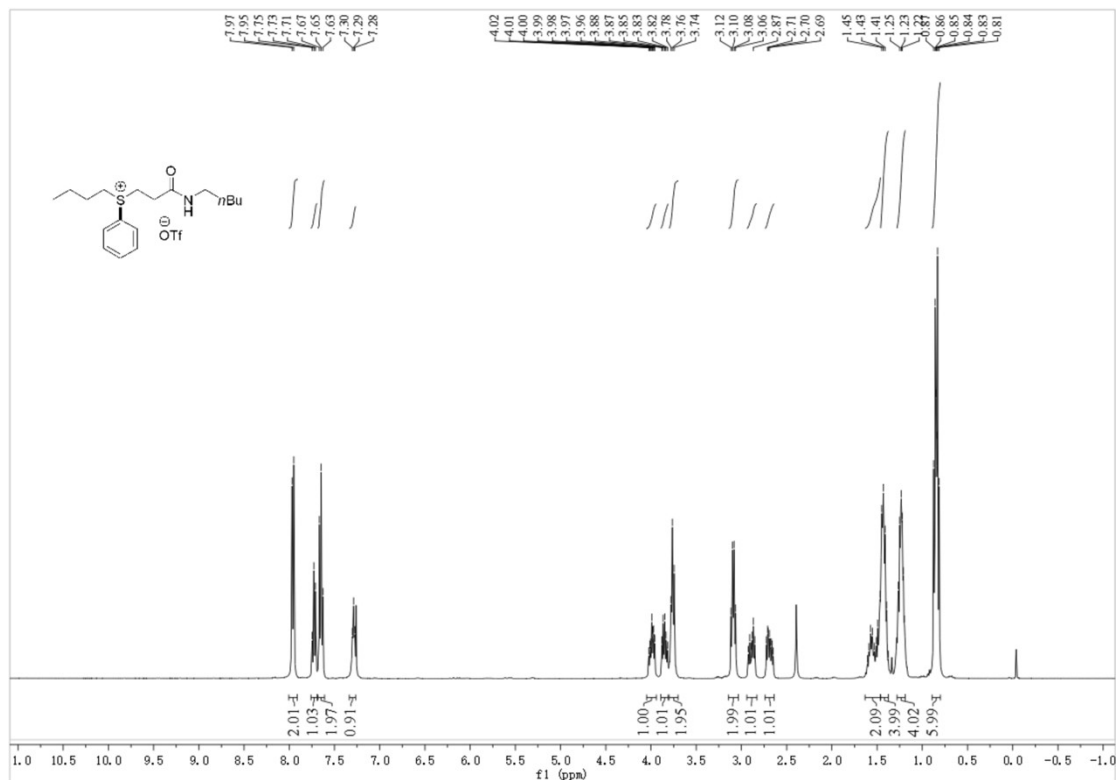

$^{13}\text{C}$  NMR spectrum of **3a** ( $\text{CDCl}_3$ , 101 MHz)

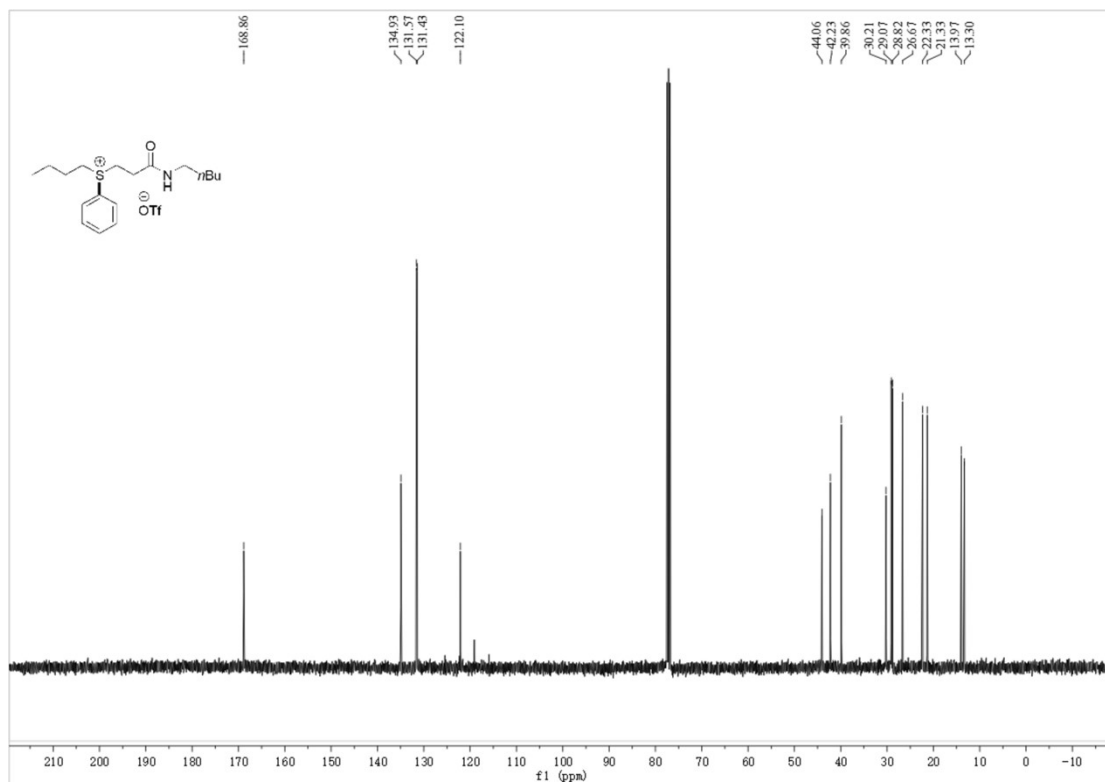

$^1\text{H}$  NMR spectrum of **3b** ( $\text{CDCl}_3$ , 400 MHz)

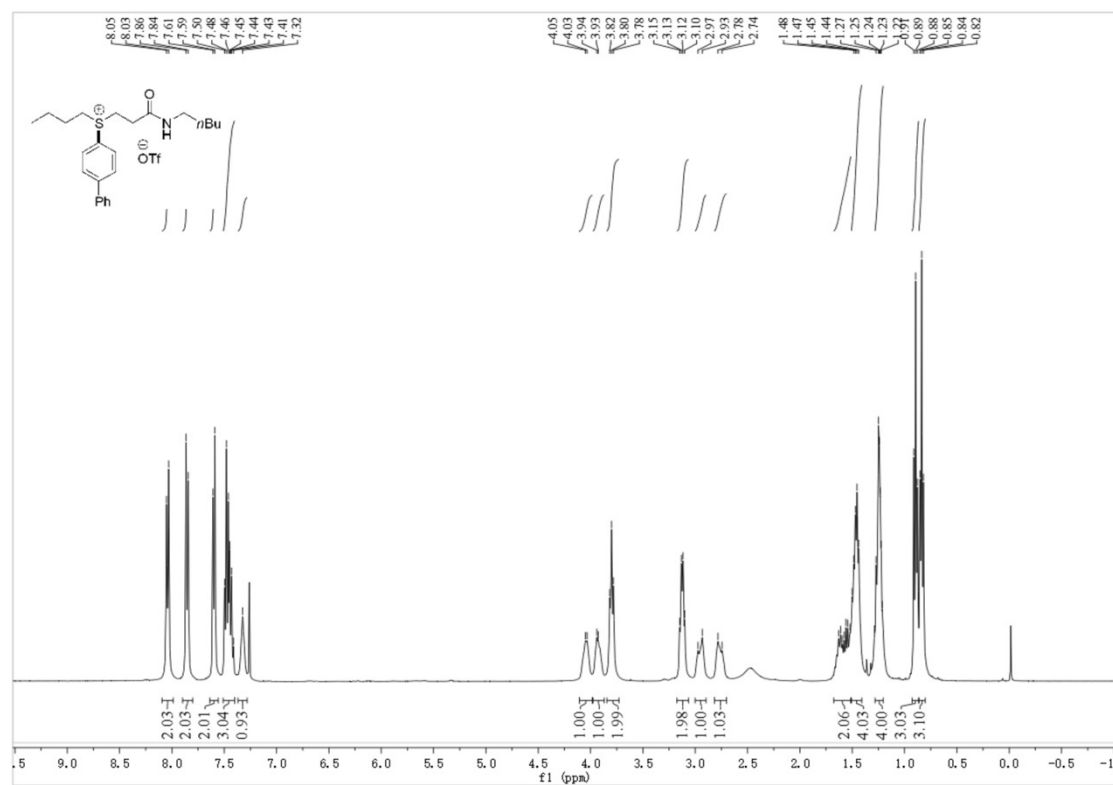

$^{13}\text{C}$  NMR spectrum of **3b** ( $\text{CDCl}_3$ , 101 MHz)

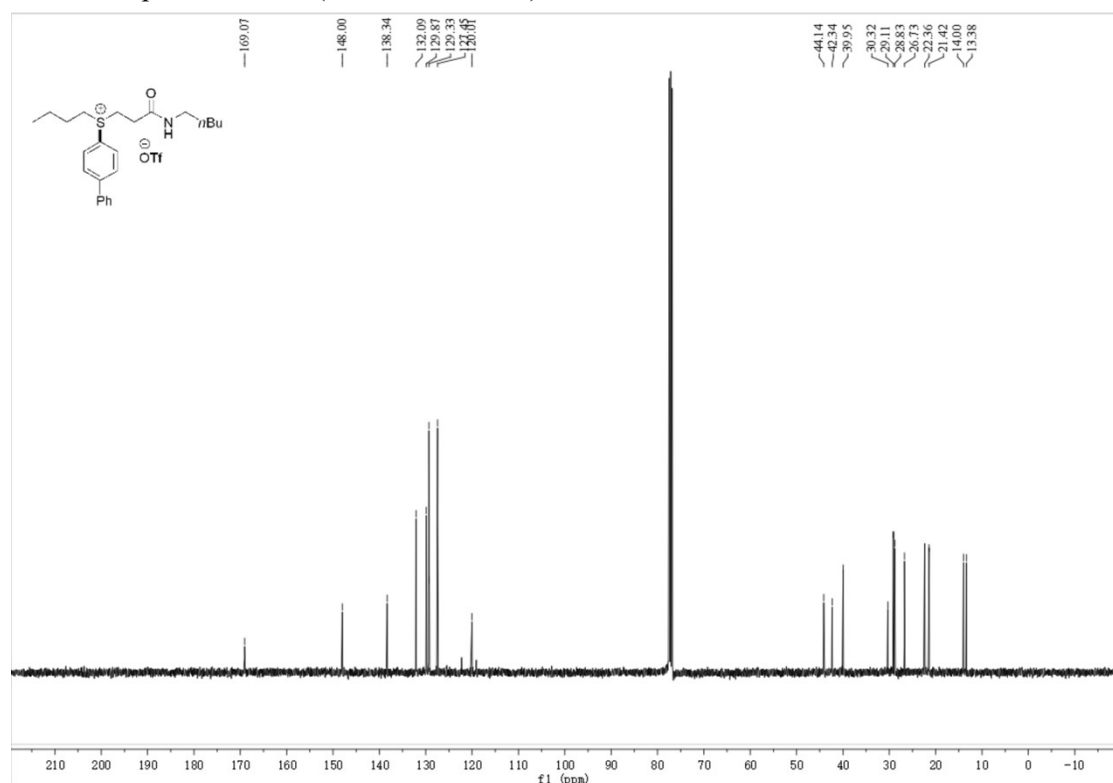

$^1\text{H}$  NMR spectrum of **3c** ( $\text{CDCl}_3$ , 400 MHz)

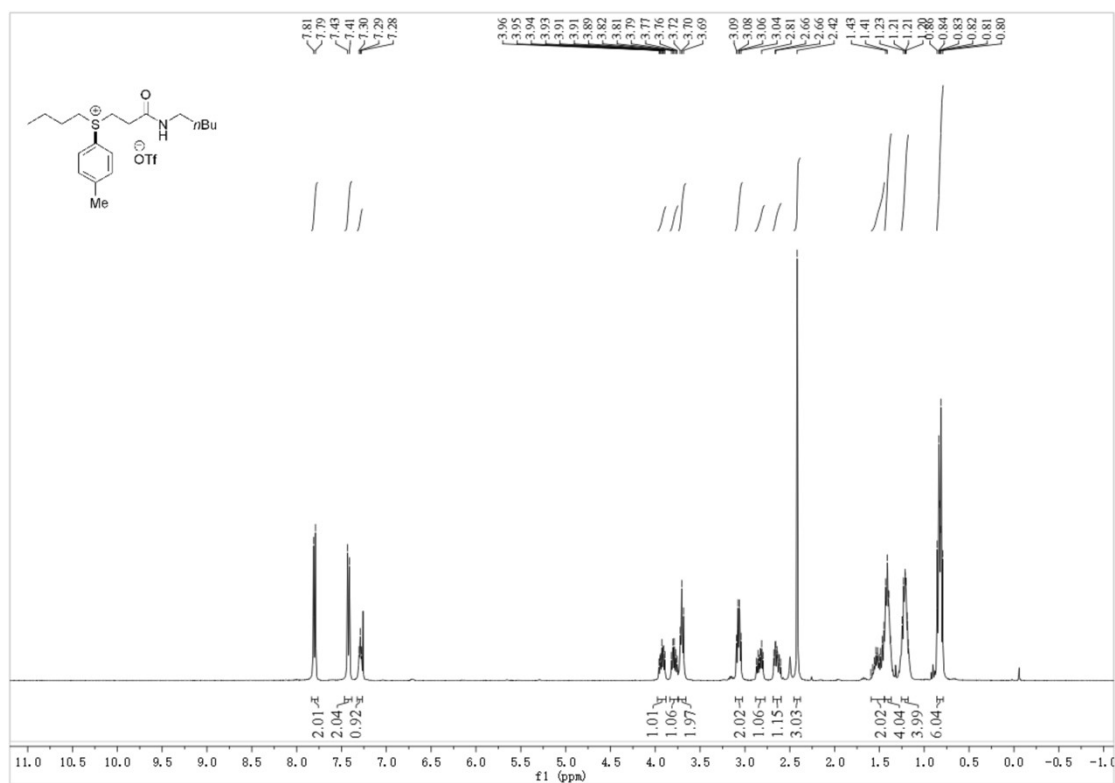

$^{13}\text{C}$  NMR spectrum of **3c** ( $\text{CDCl}_3$ , 101 MHz)

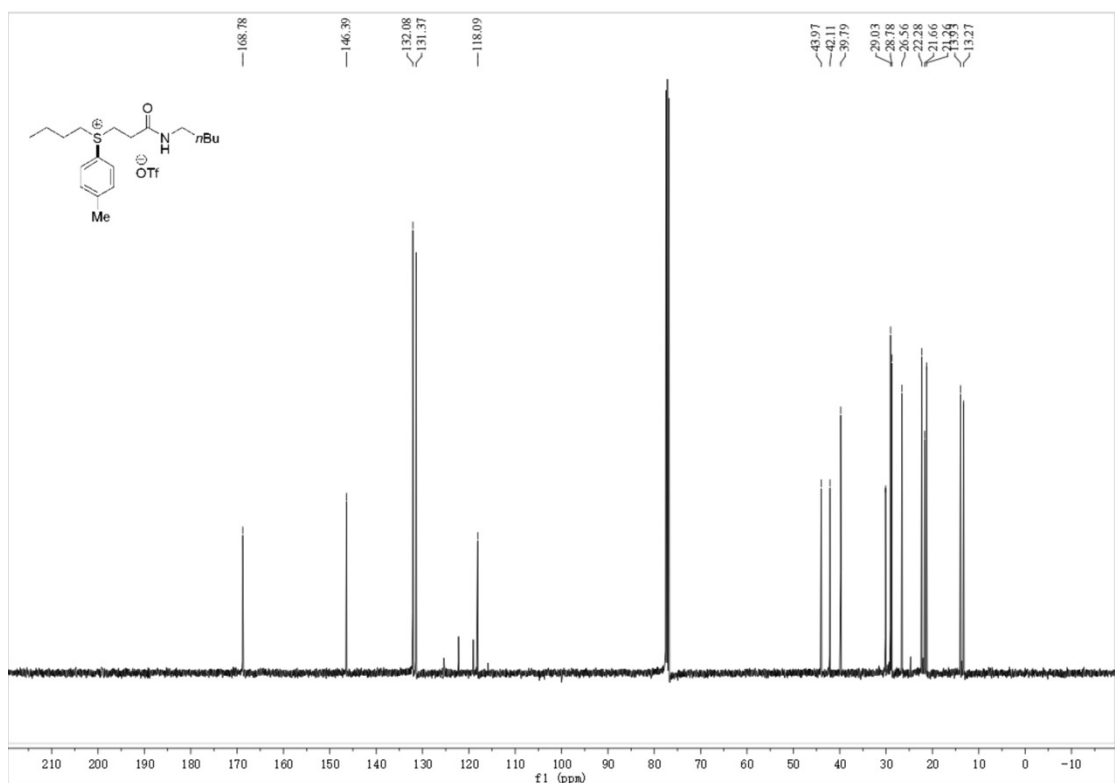

<sup>1</sup>H NMR spectrum of **3d** (CDCl<sub>3</sub>, 400 MHz)

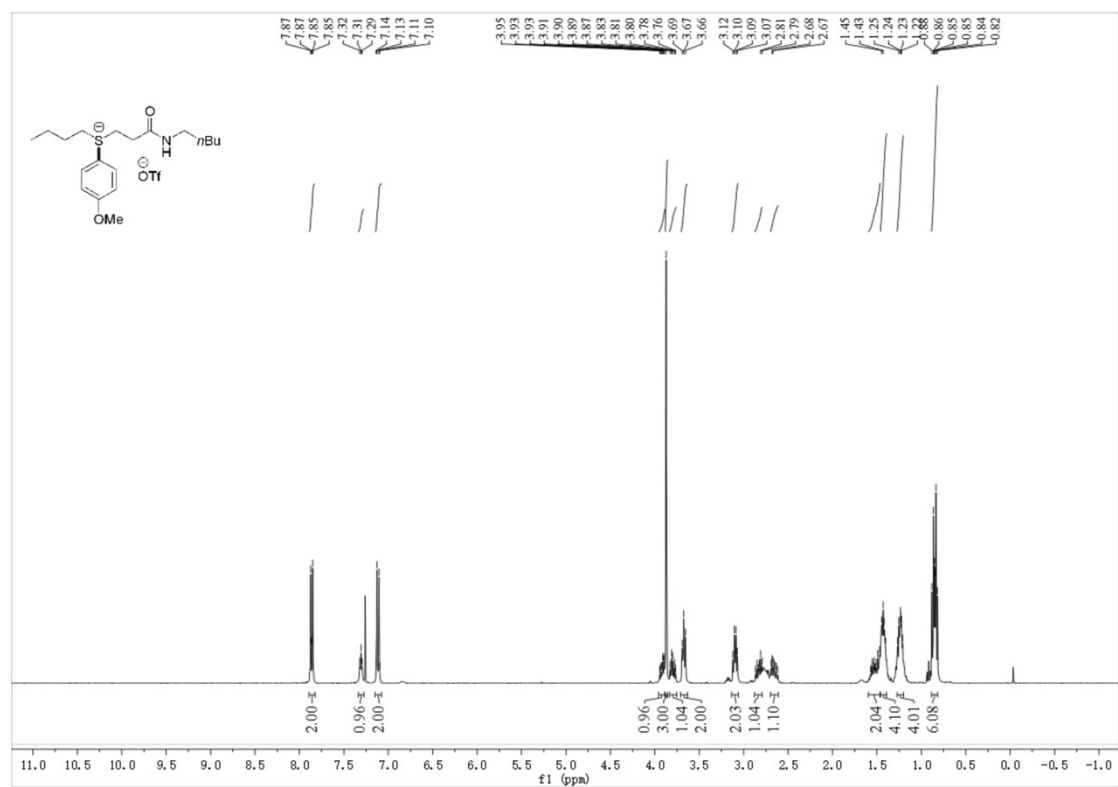

<sup>13</sup>C NMR spectrum of **3d** (CDCl<sub>3</sub>, 101 MHz)

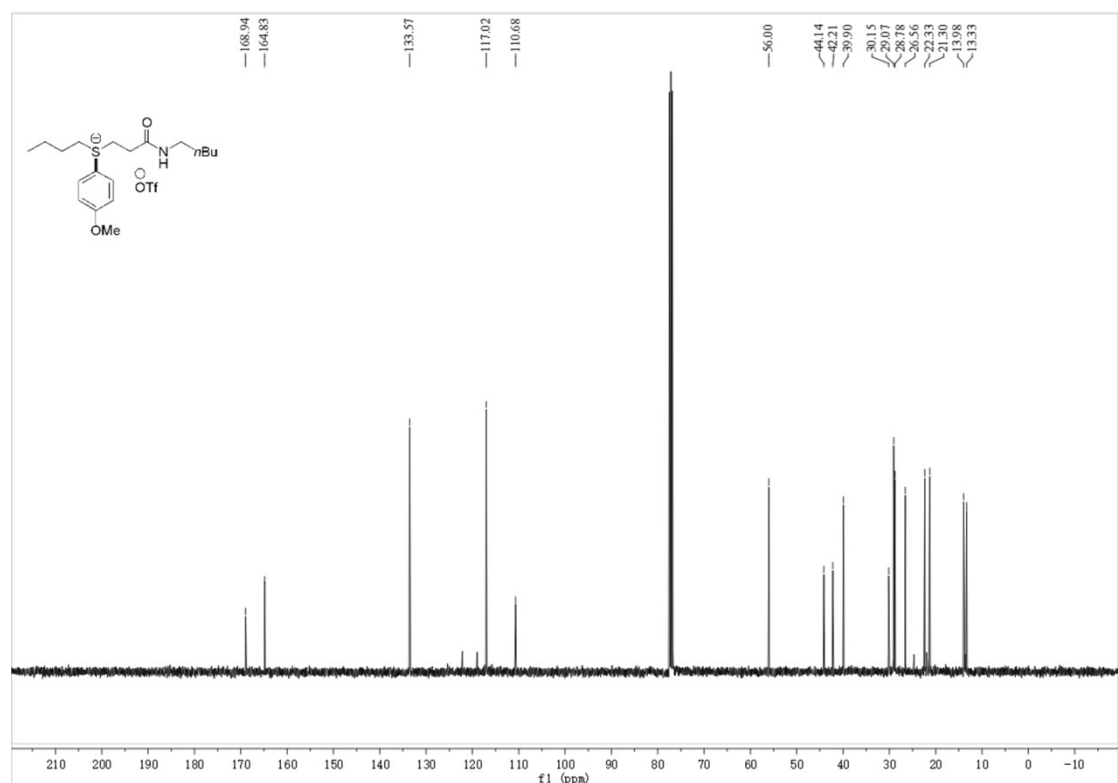

<sup>1</sup>H NMR spectrum of **3e** (CDCl<sub>3</sub>, 400 MHz)

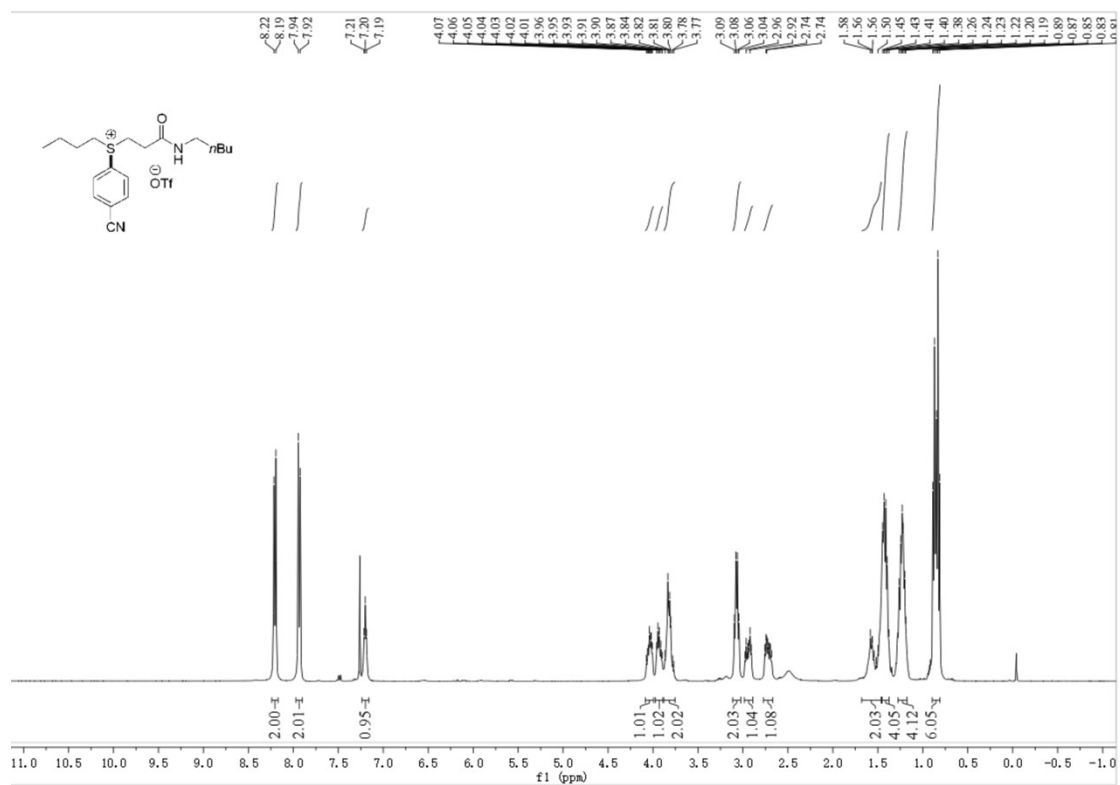

<sup>13</sup>C NMR spectrum of **3e** (CDCl<sub>3</sub>, 101 MHz)

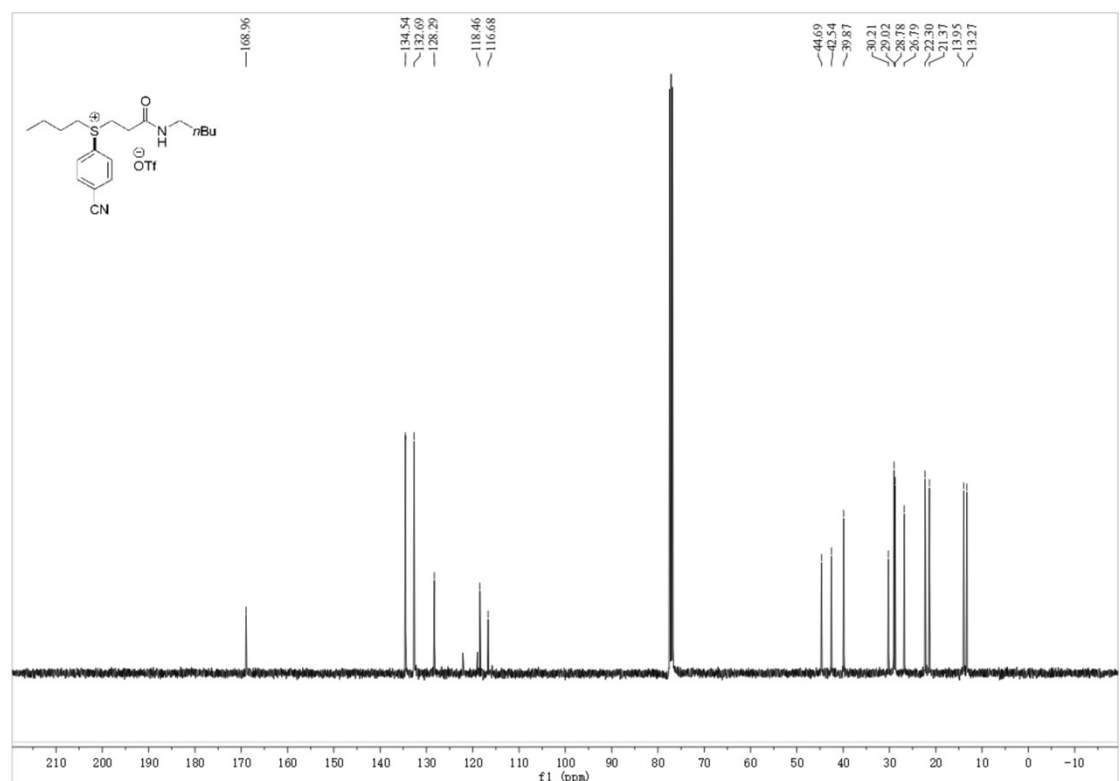

$^1\text{H}$  NMR spectrum of **3f** ( $\text{CDCl}_3$ , 400 MHz)

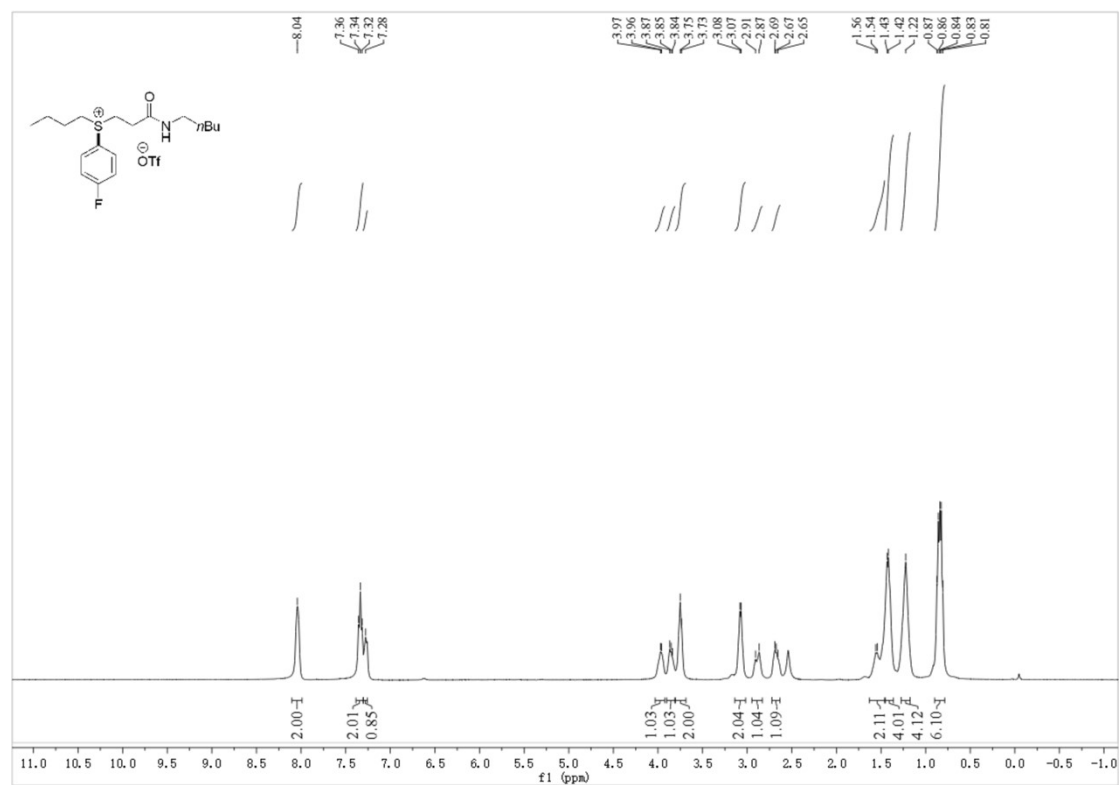

$^{13}\text{C}$  NMR spectrum of **3f** ( $\text{CDCl}_3$ , 101 MHz)

$^{19}\text{F}$  NMR spectrum of **3f** (376 MHz,  $\text{CDCl}_3$ )

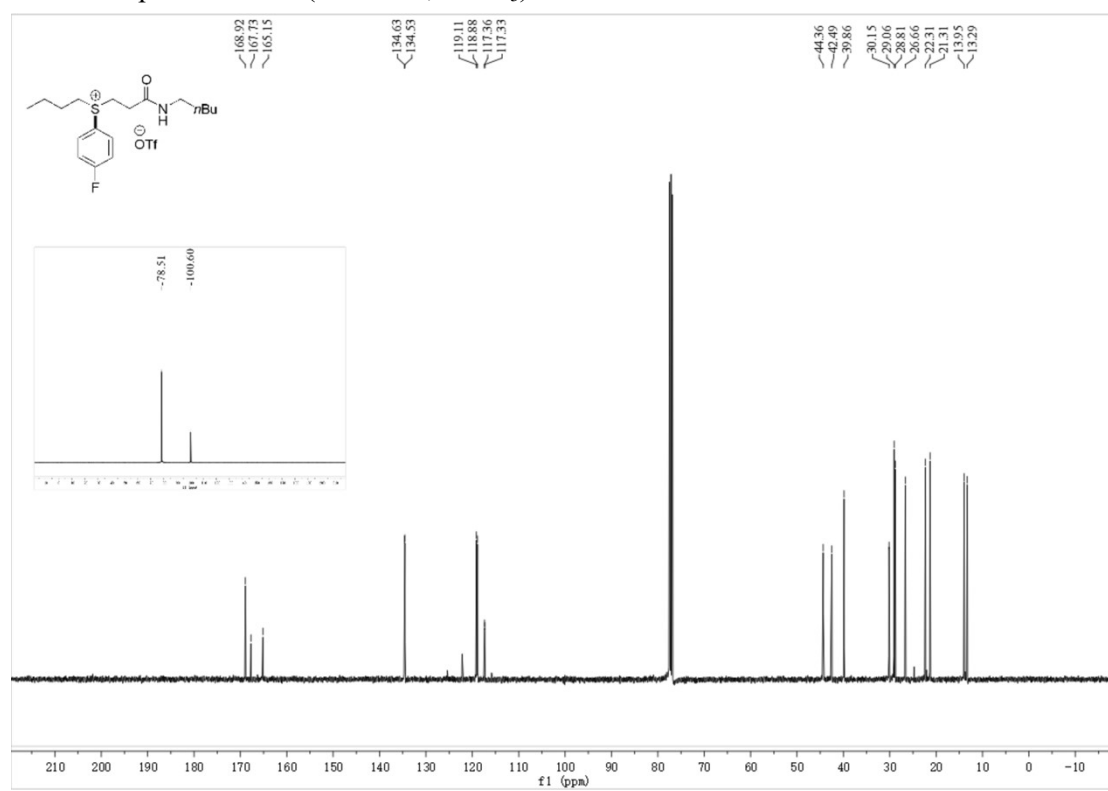

$^1\text{H}$  NMR spectrum of **3g** ( $\text{CDCl}_3$ , 400 MHz)

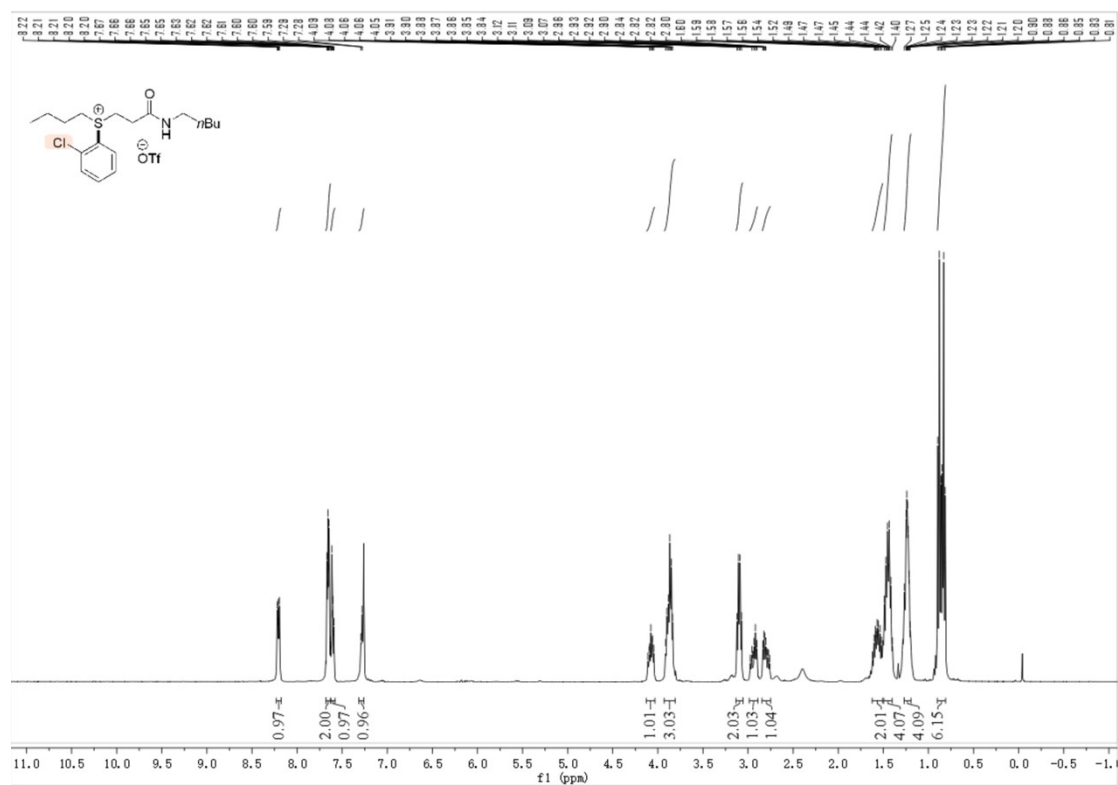

$^{13}\text{C}$  NMR spectrum of **3g** ( $\text{CDCl}_3$ , 101 MHz)

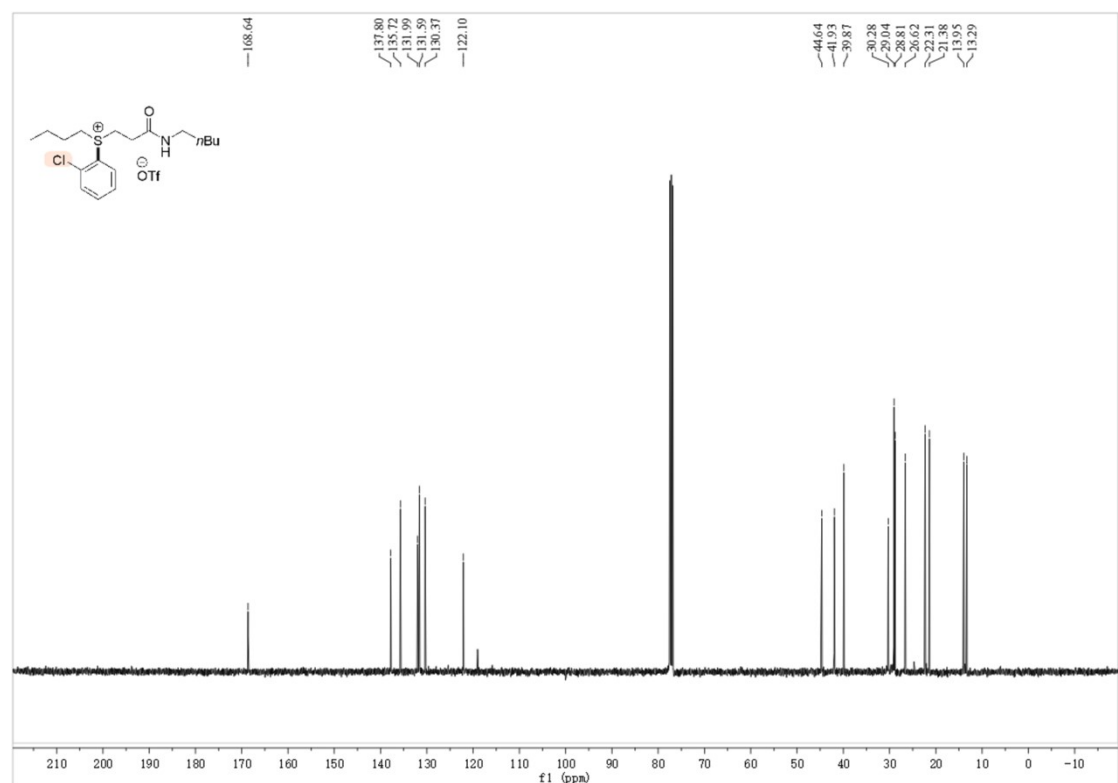

$^1\text{H}$  NMR spectrum of **3h** ( $\text{CDCl}_3$ , 400 MHz)

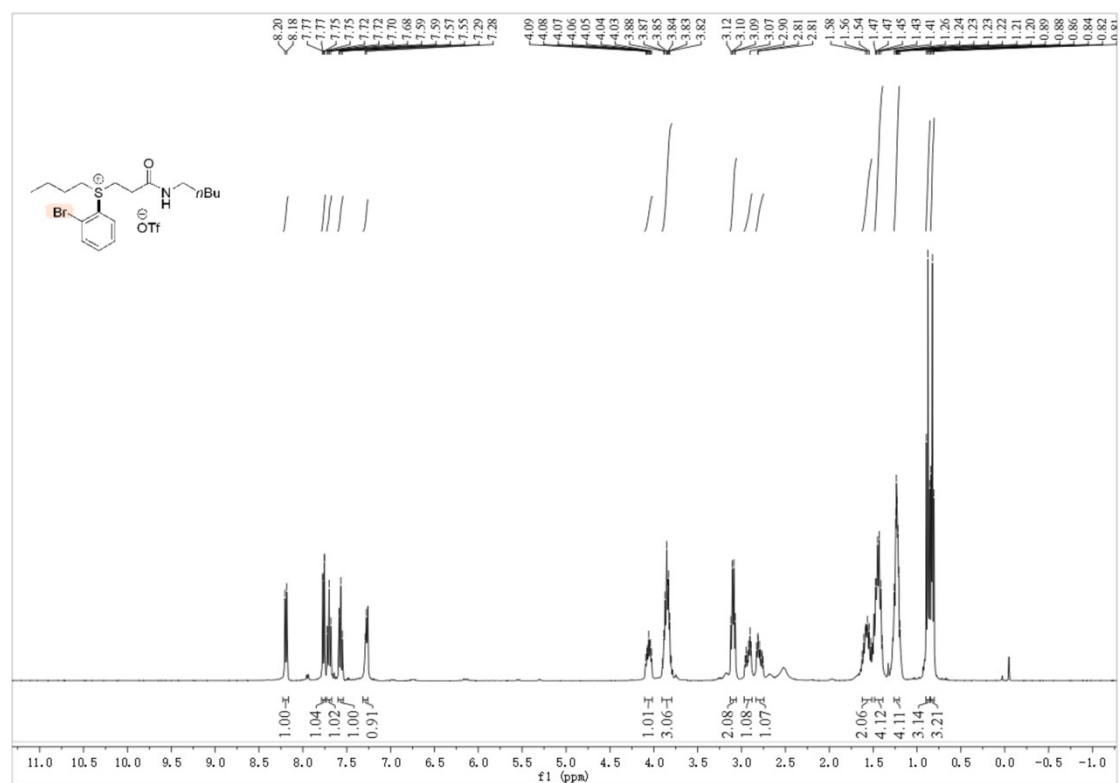

$^{13}\text{C}$  NMR spectrum of **3h** ( $\text{CDCl}_3$ , 101 MHz)

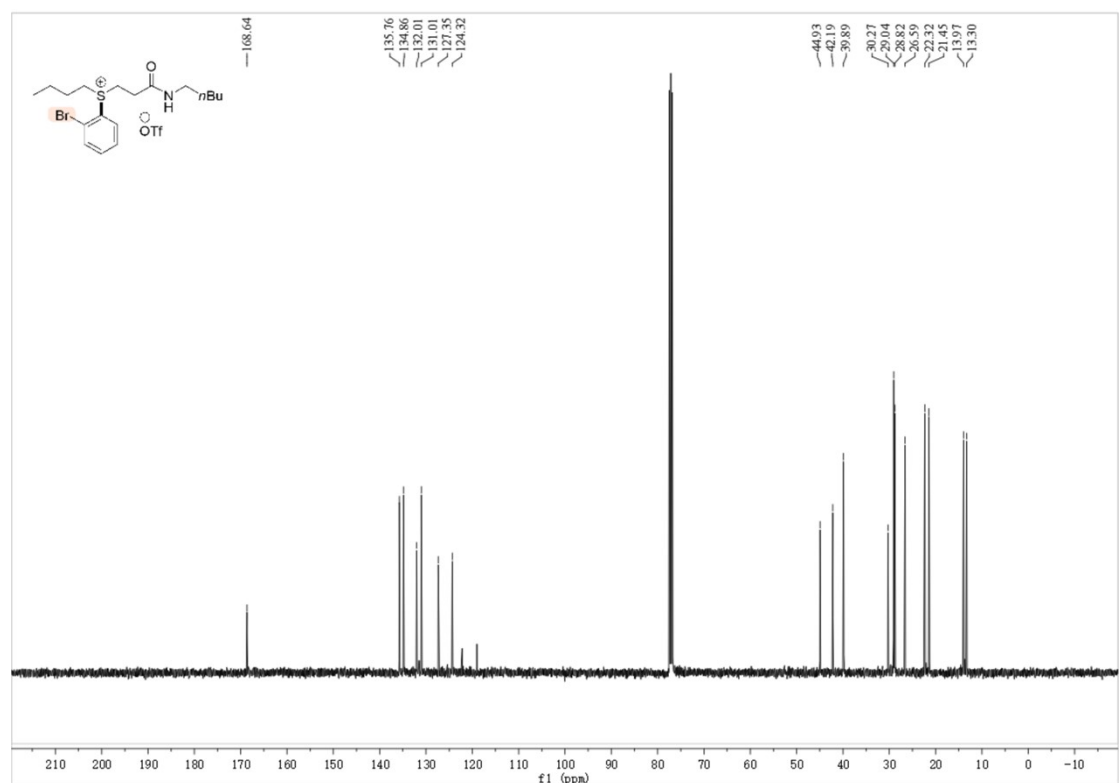

$^1\text{H}$  NMR spectrum of **3i** ( $\text{CDCl}_3$ , 400 MHz)

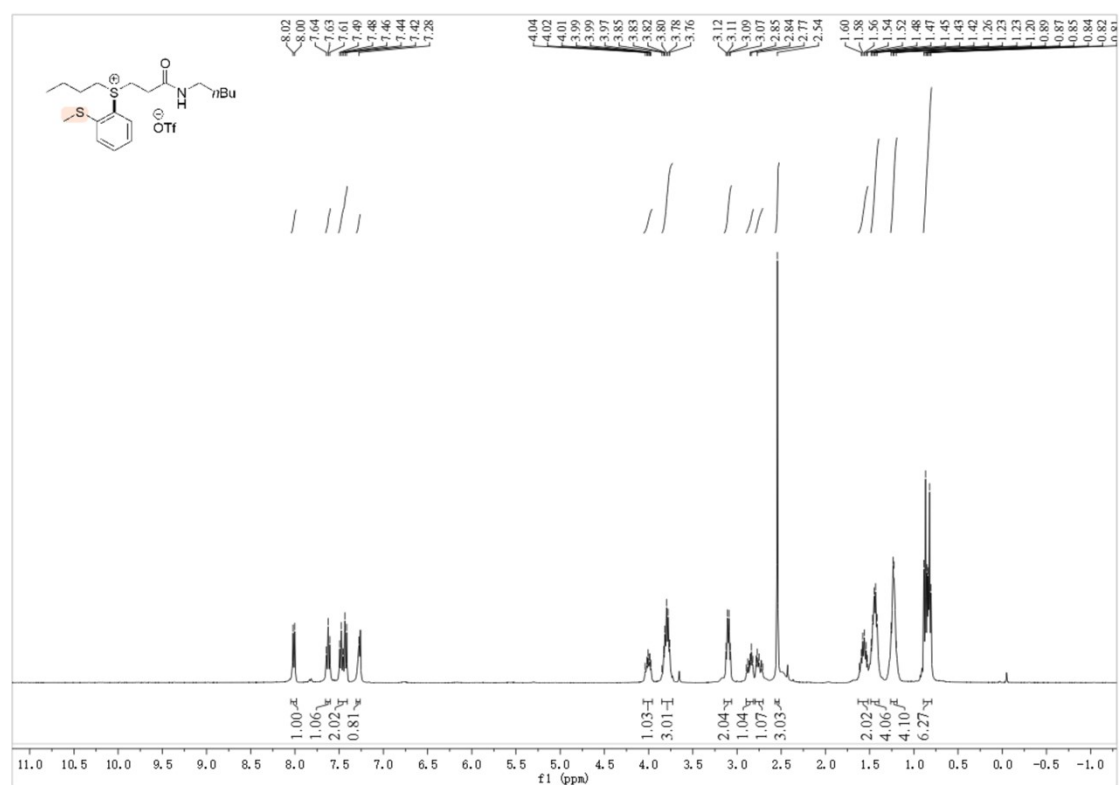

$^{13}\text{C}$  NMR spectrum of **3i** ( $\text{CDCl}_3$ , 101 MHz)

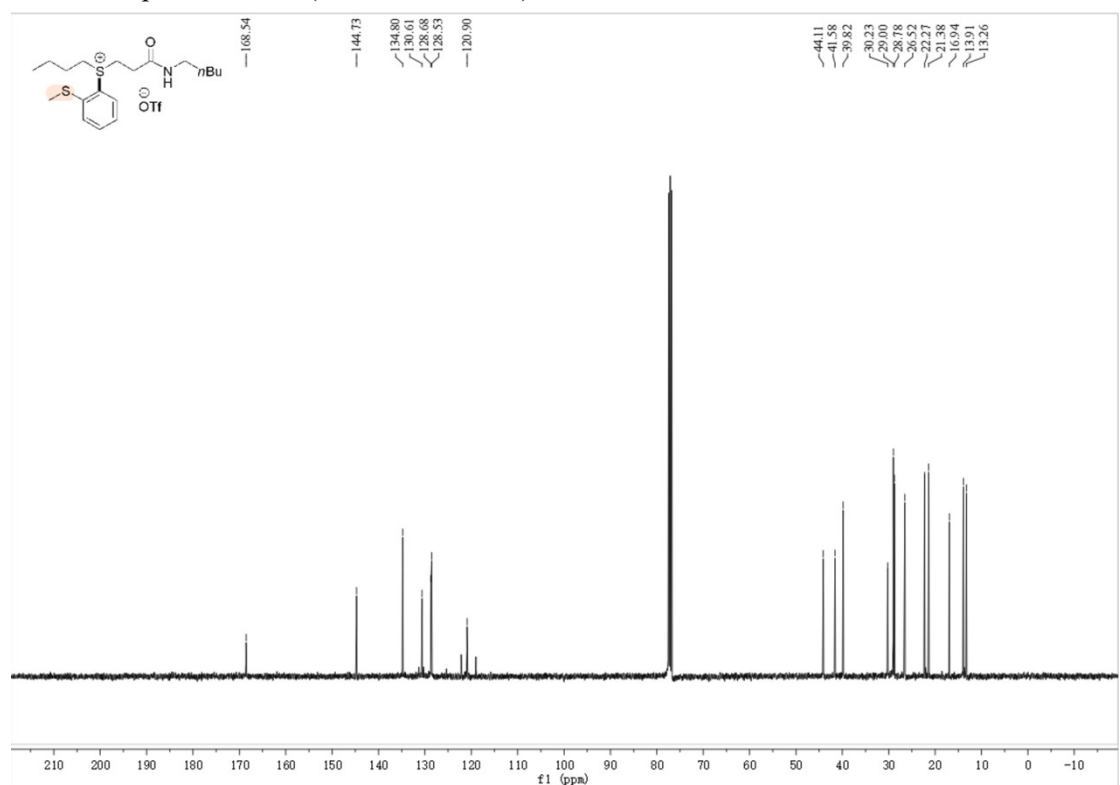

$^1\text{H}$  NMR spectrum of **3j** ( $\text{CDCl}_3$ , 400 MHz)

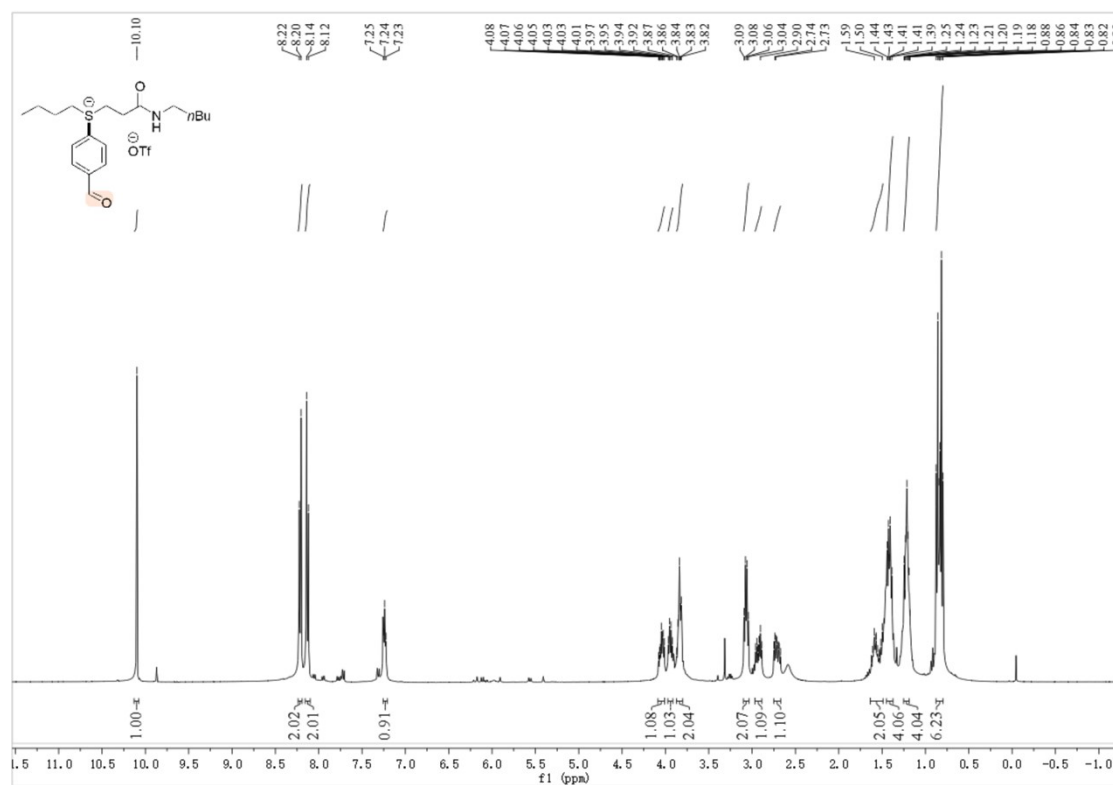

$^{13}\text{C}$  NMR spectrum of **3j** ( $\text{CDCl}_3$ , 101 MHz)

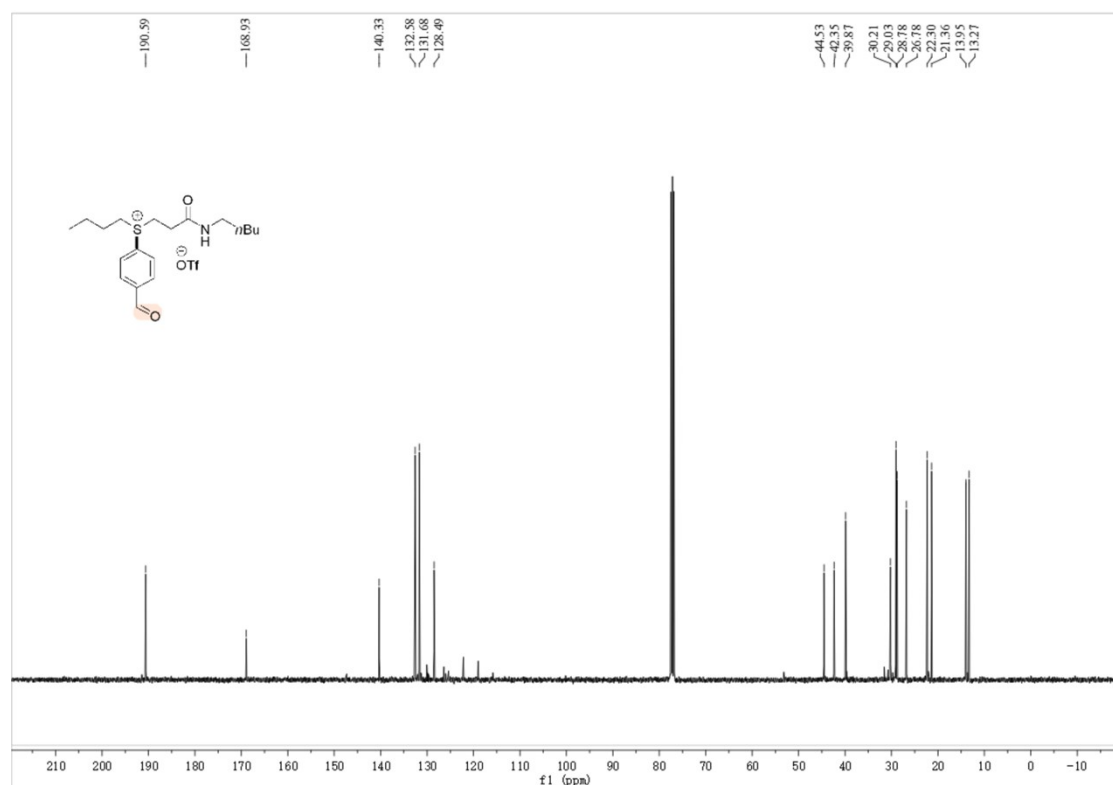

$^1\text{H}$  NMR spectrum of **3k** ( $\text{CDCl}_3$ , 400 MHz)

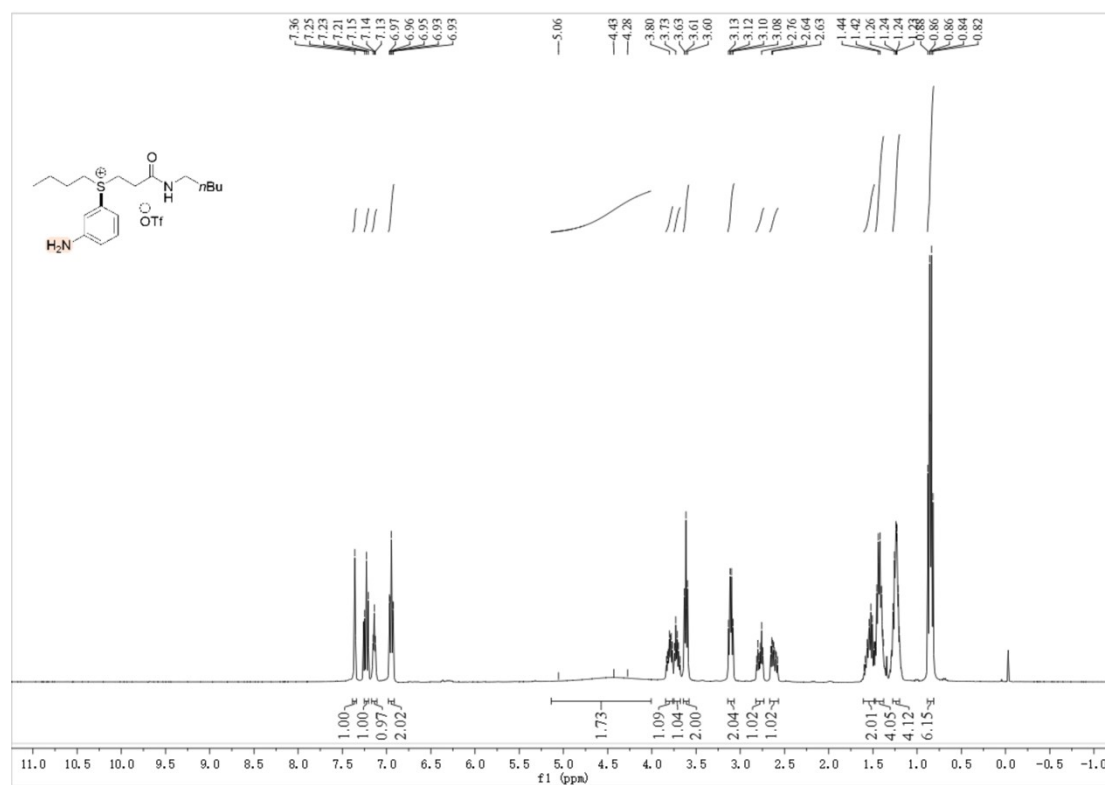

$^{13}\text{C}$  NMR spectrum of **3k** ( $\text{CDCl}_3$ , 101 MHz)

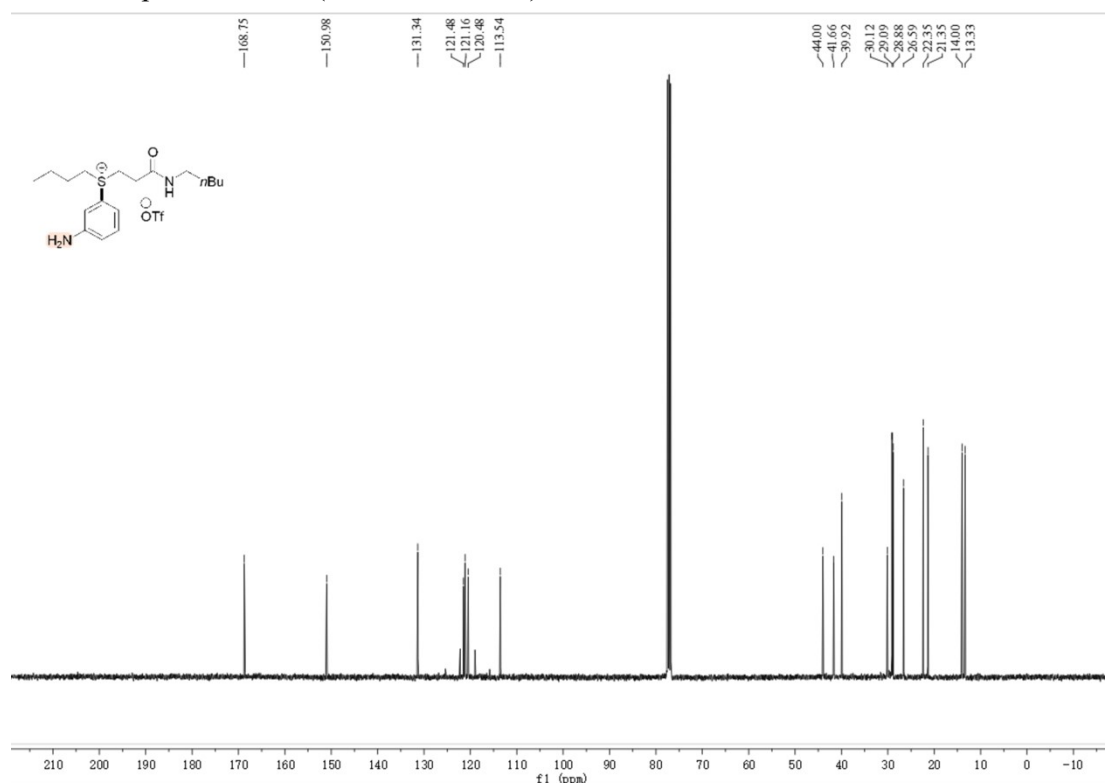

$^1\text{H}$  NMR spectrum of **31** ( $\text{CDCl}_3$ , 400 MHz)

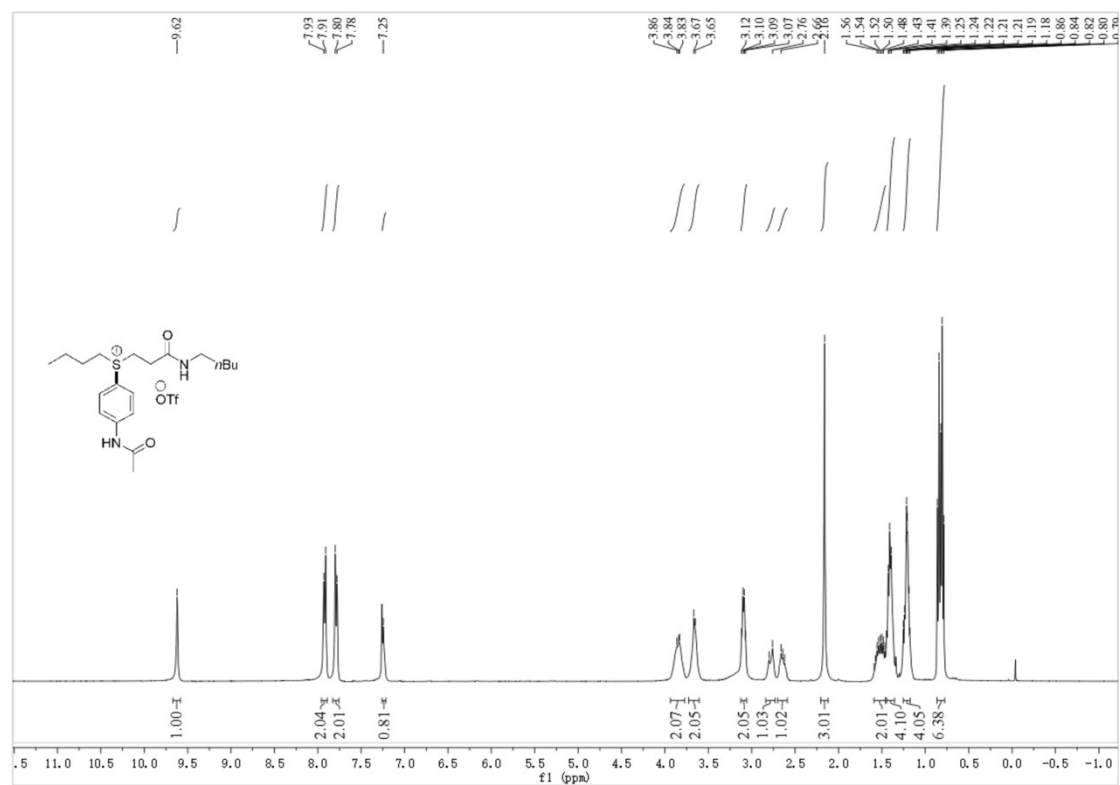

$^{13}\text{C}$  NMR spectrum of **31** ( $\text{CDCl}_3$ , 101 MHz)

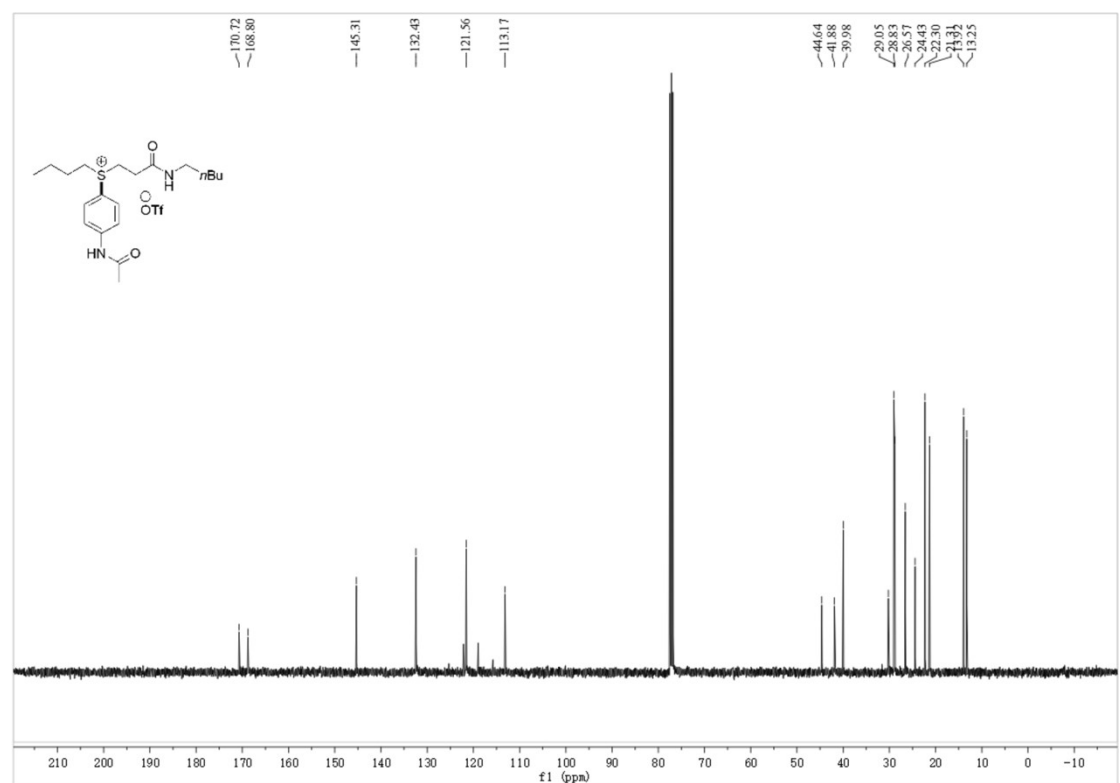



<sup>1</sup>H NMR spectrum of **3n** (CDCl<sub>3</sub>, 400 MHz)

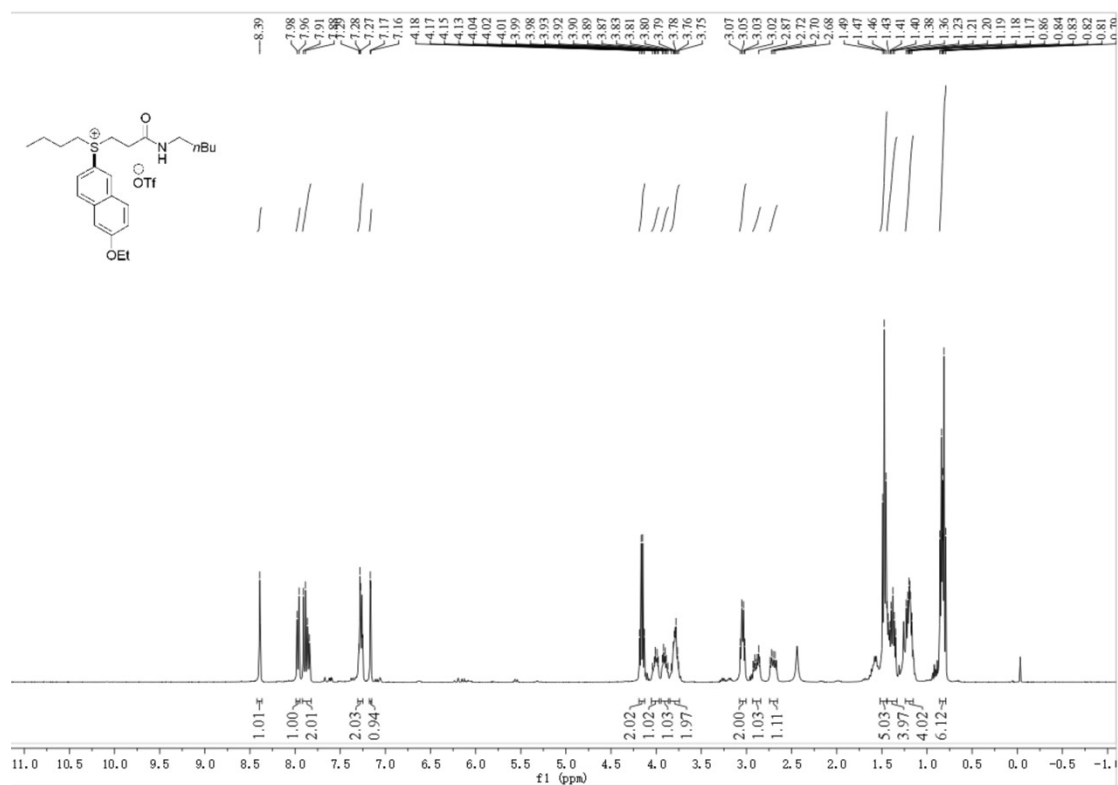

<sup>13</sup>C NMR spectrum of **3n** (CDCl<sub>3</sub>, 101 MHz)

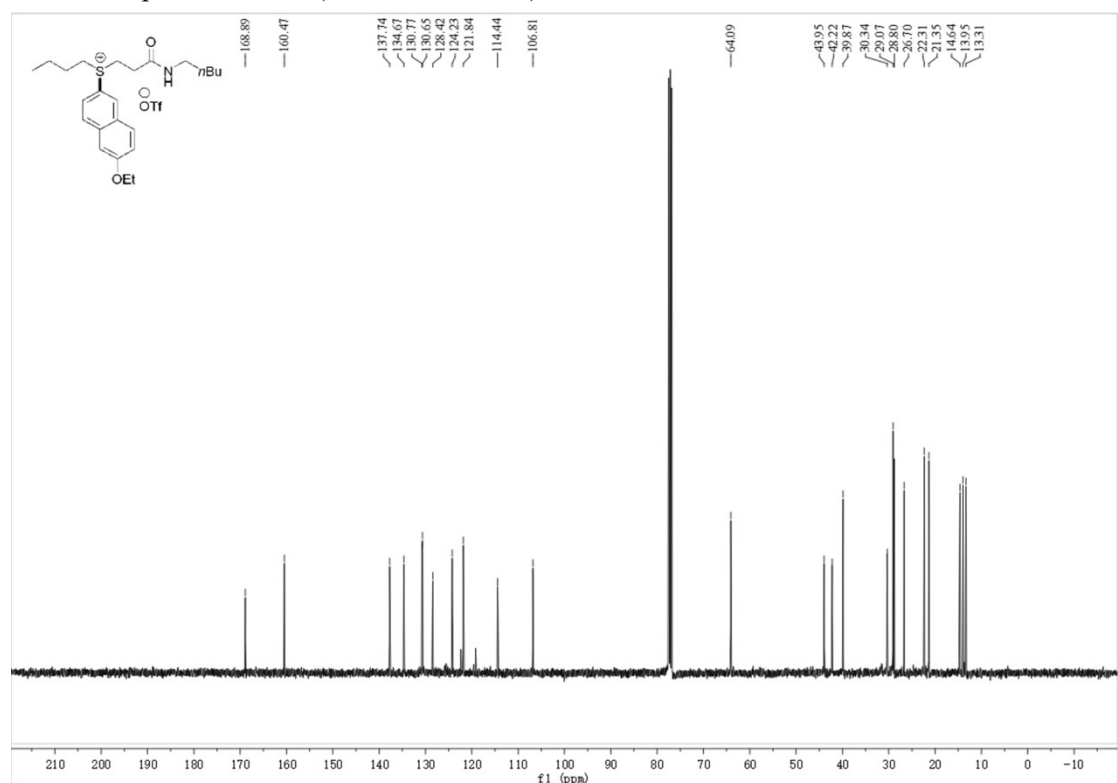

$^1\text{H}$  NMR spectrum of **3o** ( $\text{CDCl}_3$ , 400 MHz)

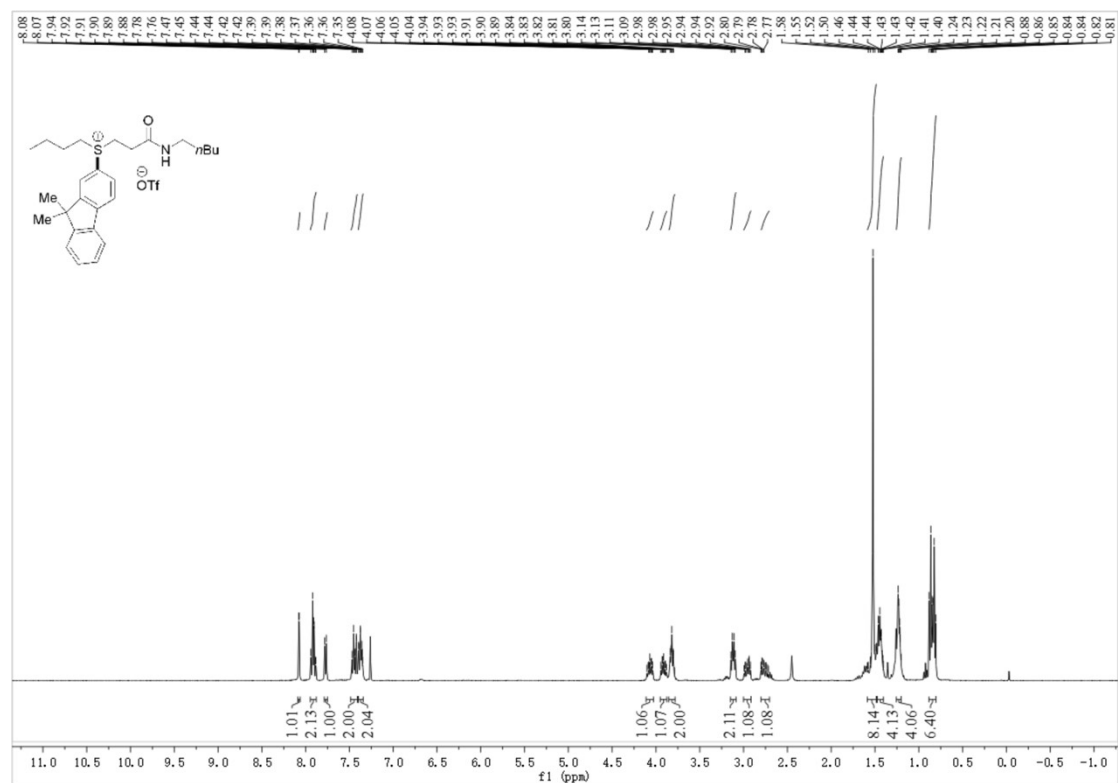

$^{13}\text{C}$  NMR spectrum of **3o** ( $\text{CDCl}_3$ , 101 MHz)

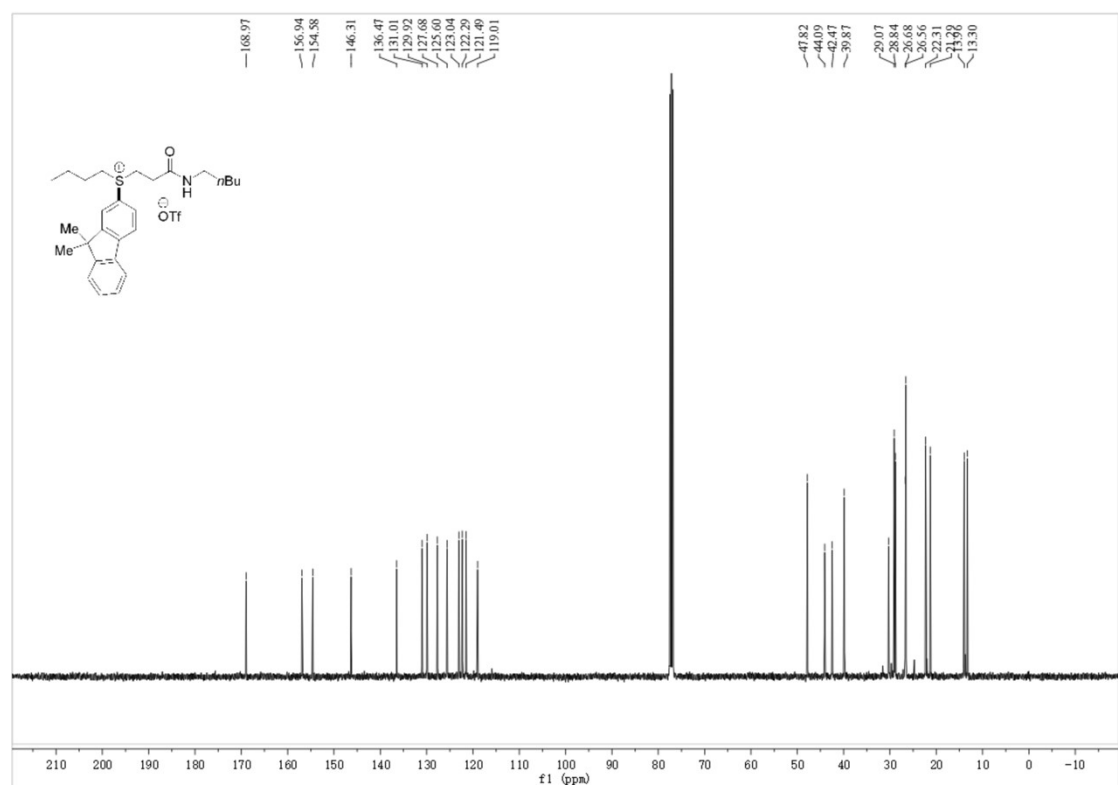

<sup>1</sup>H NMR spectrum of **3p** (CDCl<sub>3</sub>, 400 MHz)

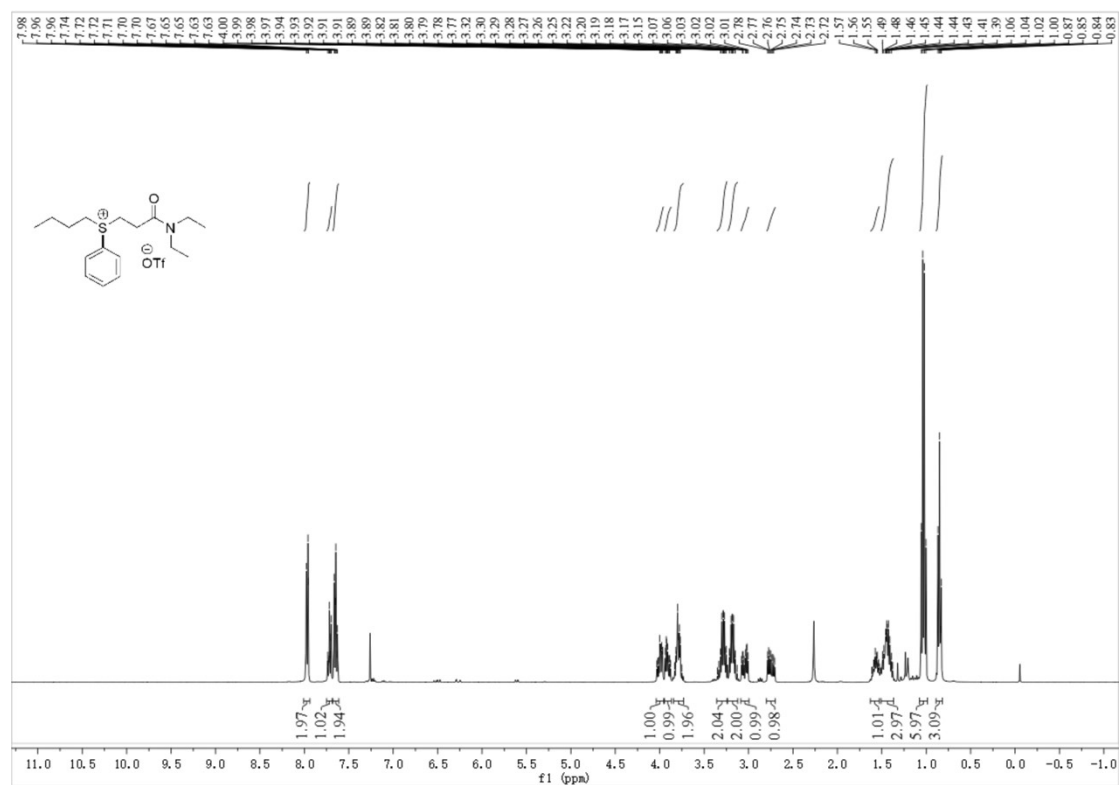

<sup>13</sup>C NMR spectrum of **3p** (CDCl<sub>3</sub>, 101 MHz)

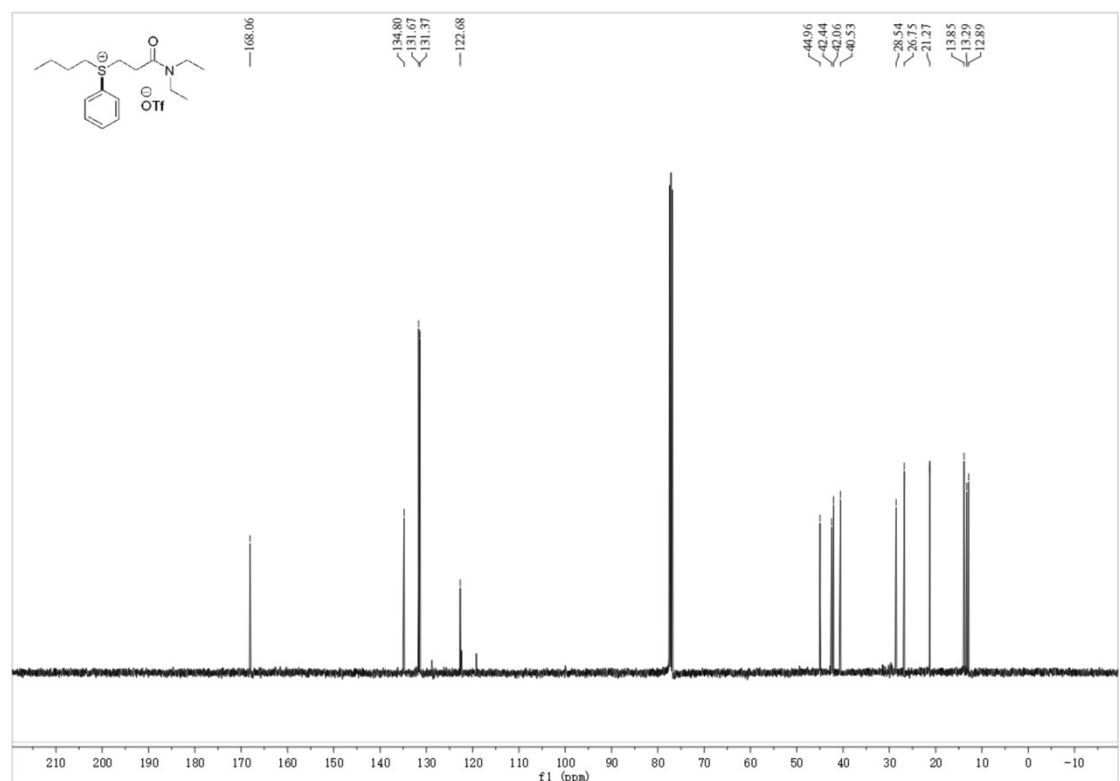

$^1\text{H}$  NMR spectrum of **3q** ( $\text{CDCl}_3$ , 400 MHz)

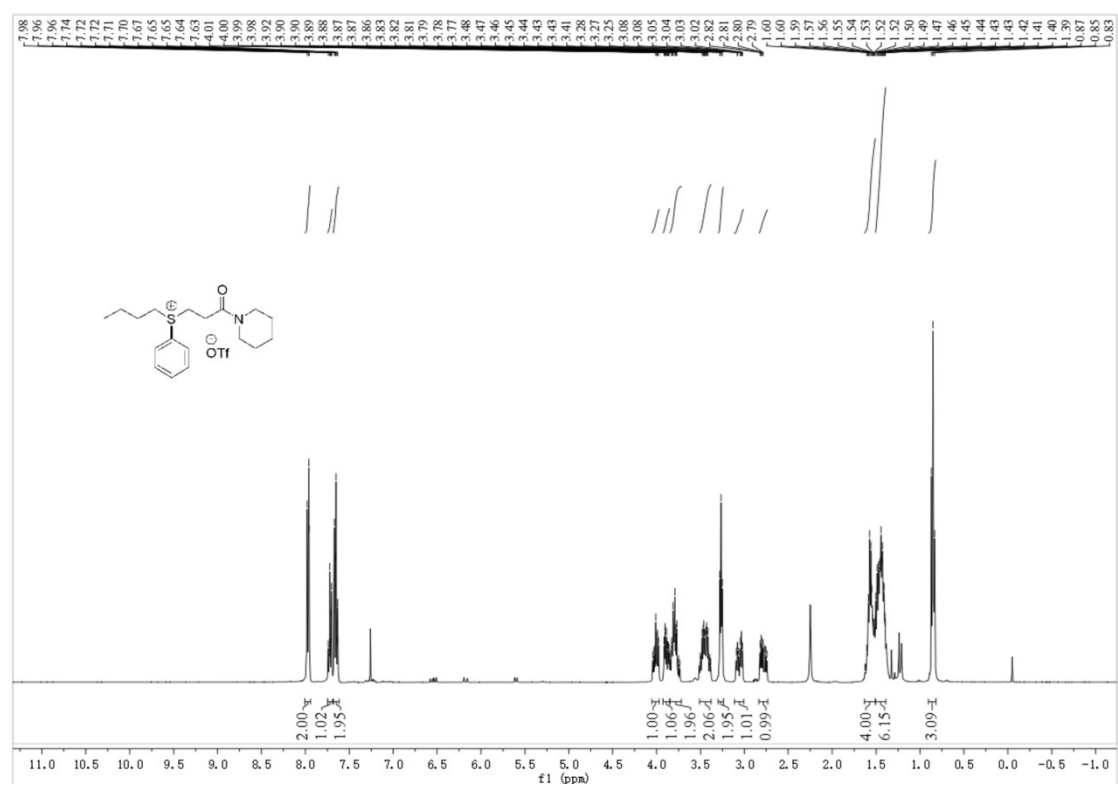

$^{13}\text{C}$  NMR spectrum of **3q** ( $\text{CDCl}_3$ , 101 MHz)

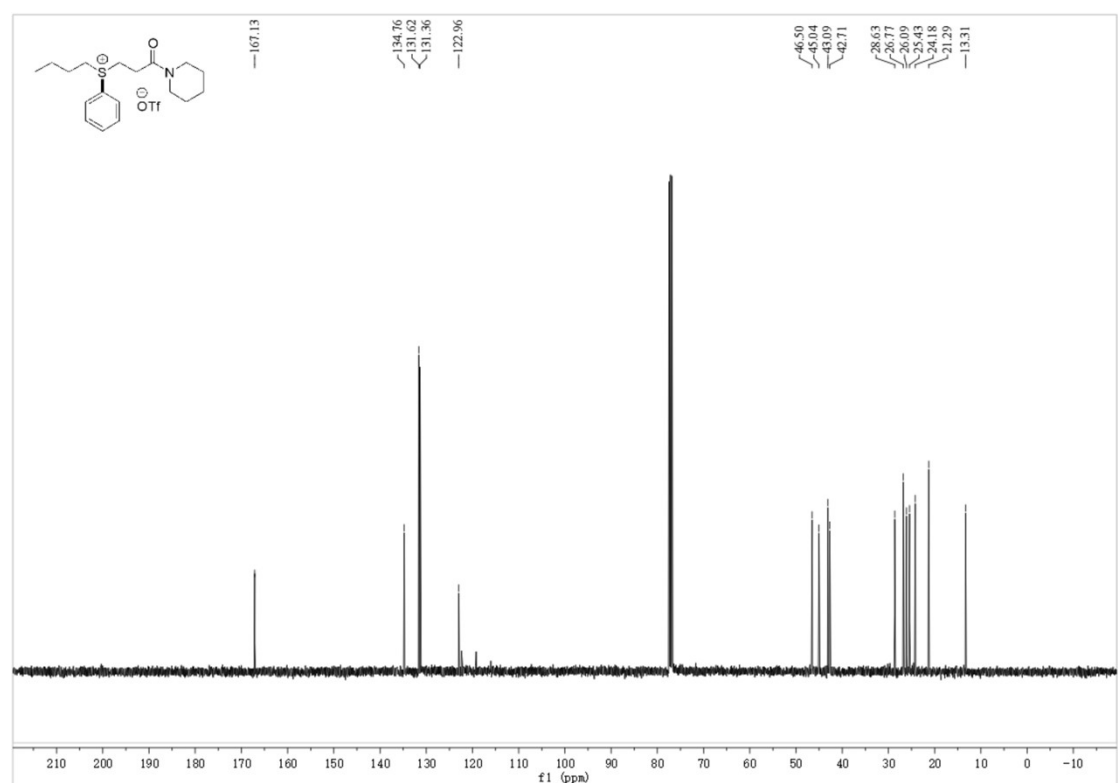

$^1\text{H}$  NMR spectrum of **3r** ( $\text{CDCl}_3$ , 400 MHz)

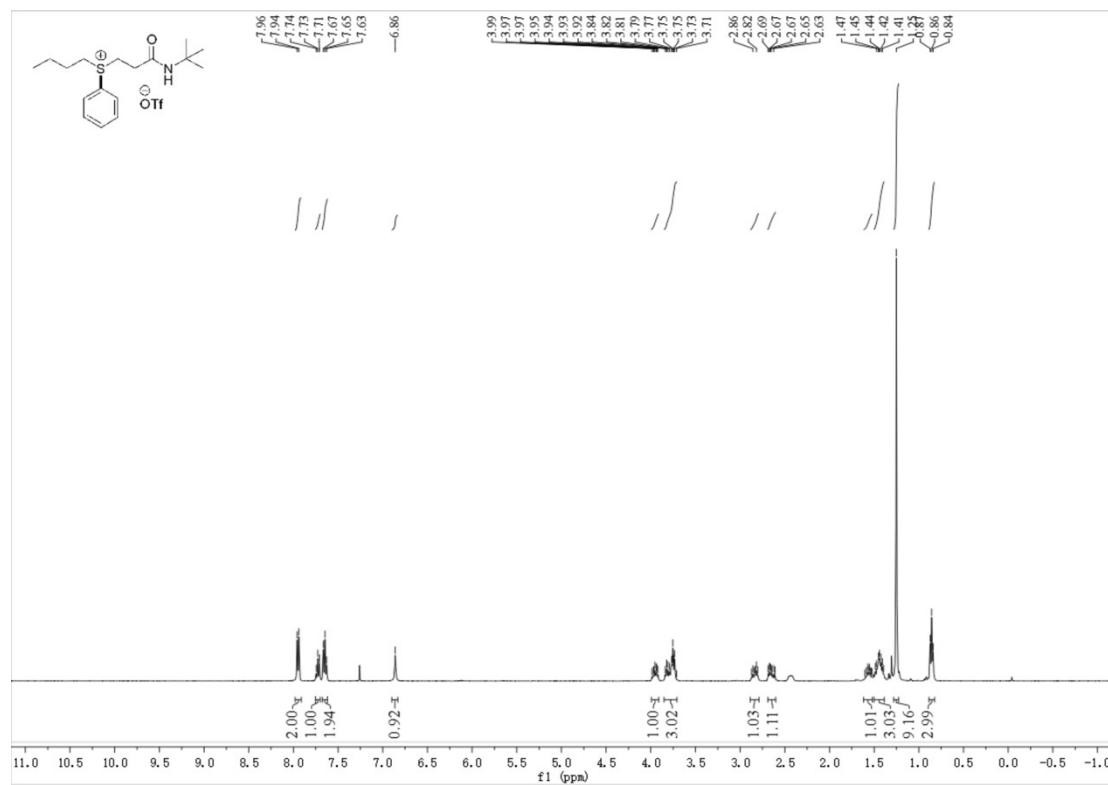

$^{13}\text{C}$  NMR spectrum of **3r** ( $\text{CDCl}_3$ , 101 MHz)

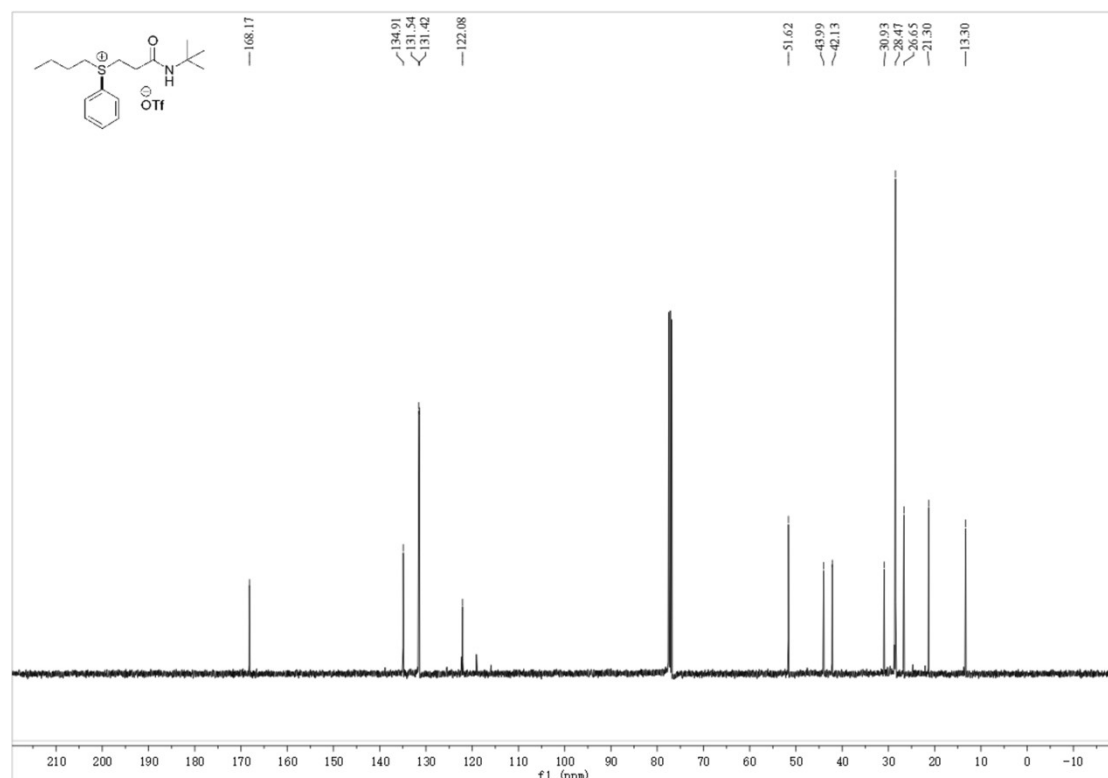

$^1\text{H}$  NMR spectrum of **3s** ( $\text{CDCl}_3$ , 400 MHz)

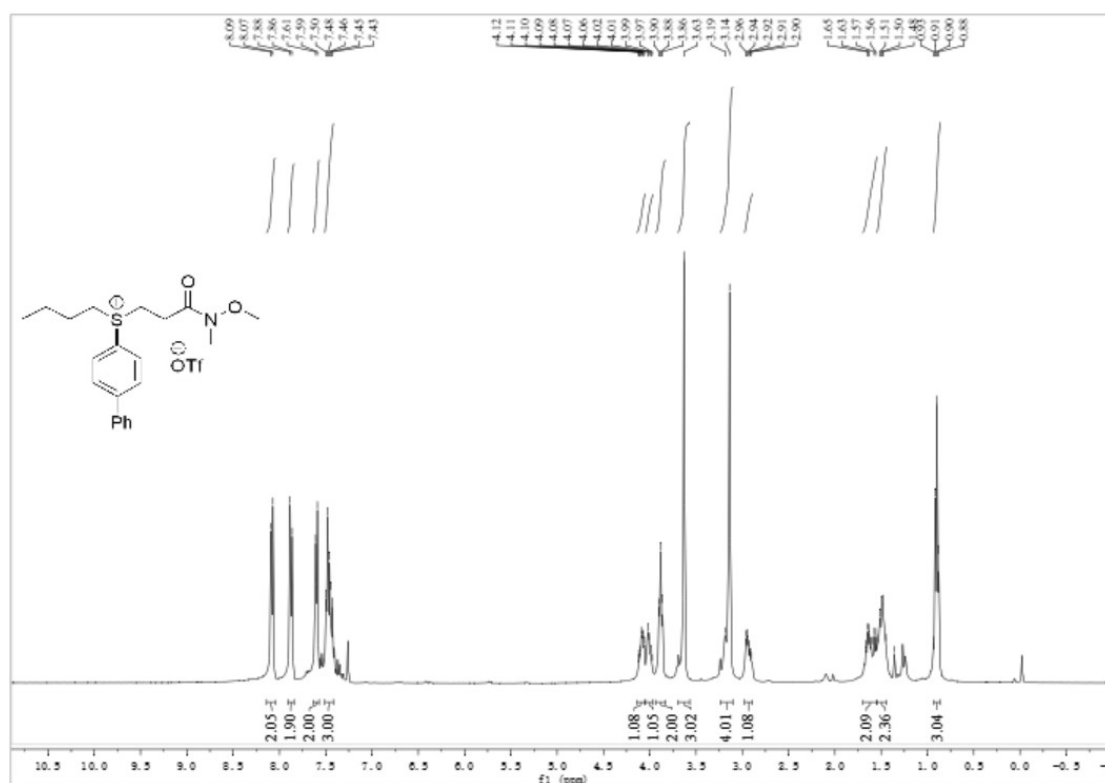

$^{13}\text{C}$  NMR spectrum of **3s** ( $\text{CDCl}_3$ , 101 MHz)

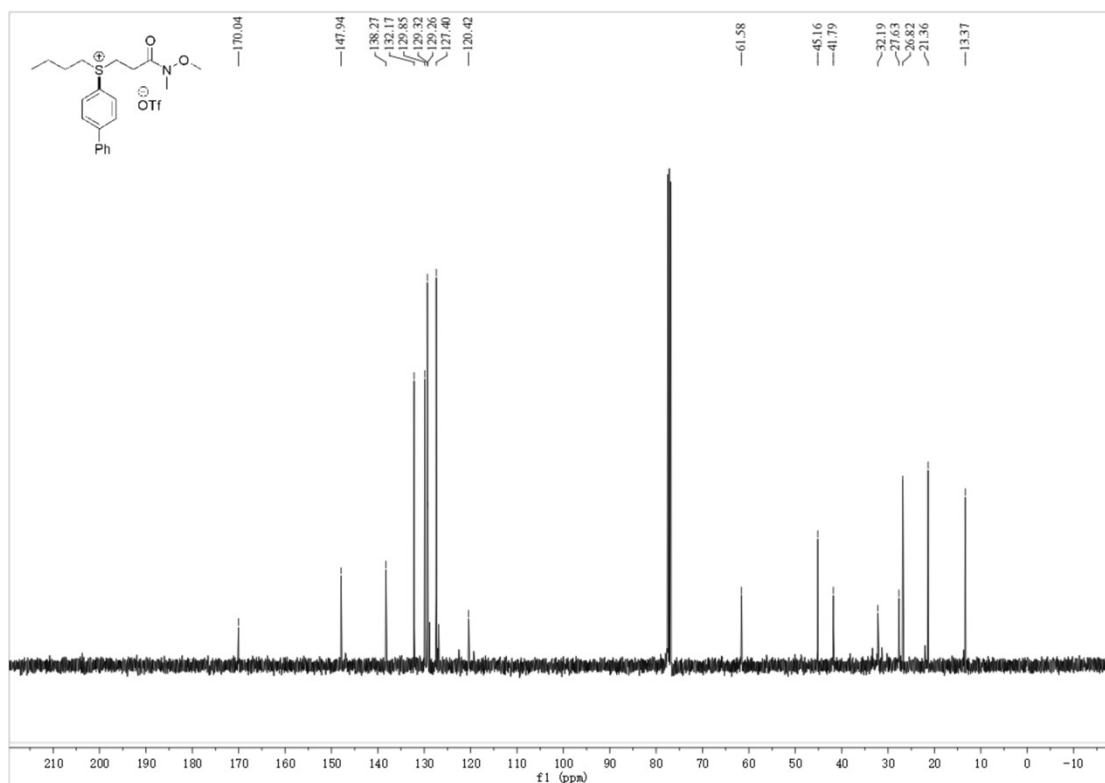

<sup>1</sup>H NMR spectrum of **3t** (CDCl<sub>3</sub>, 400 MHz)

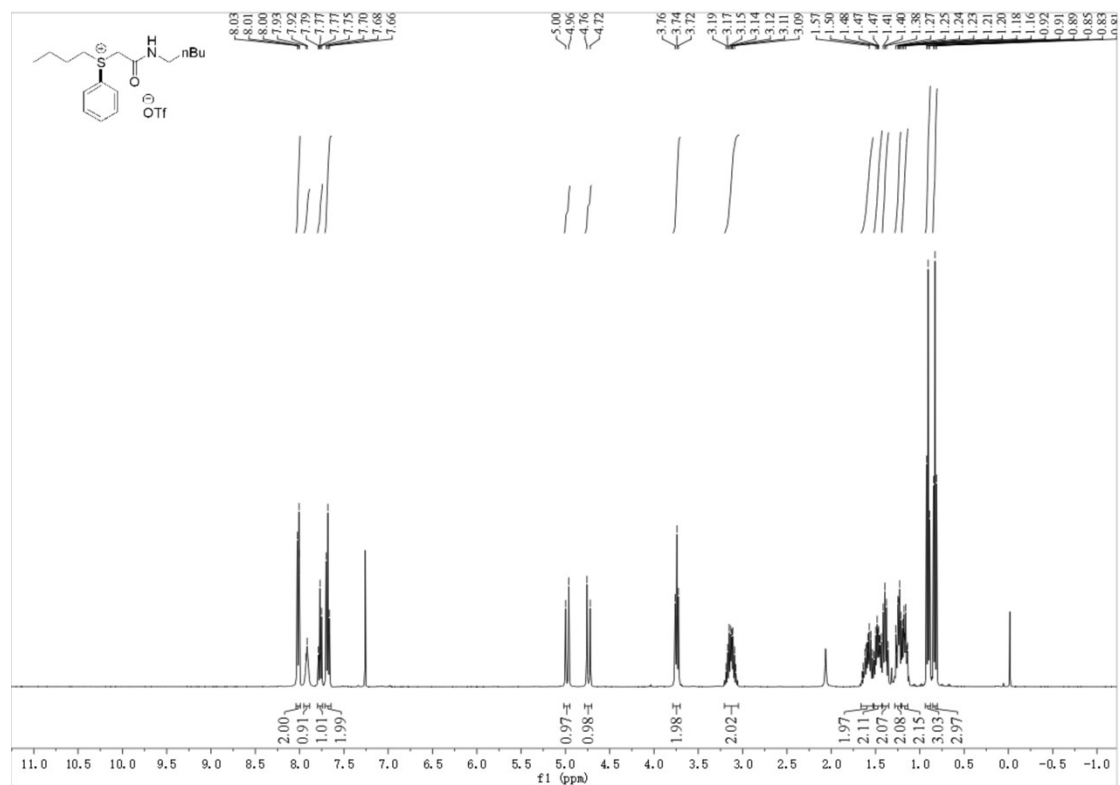

<sup>13</sup>C NMR spectrum of **3t** (CDCl<sub>3</sub>, 101 MHz)

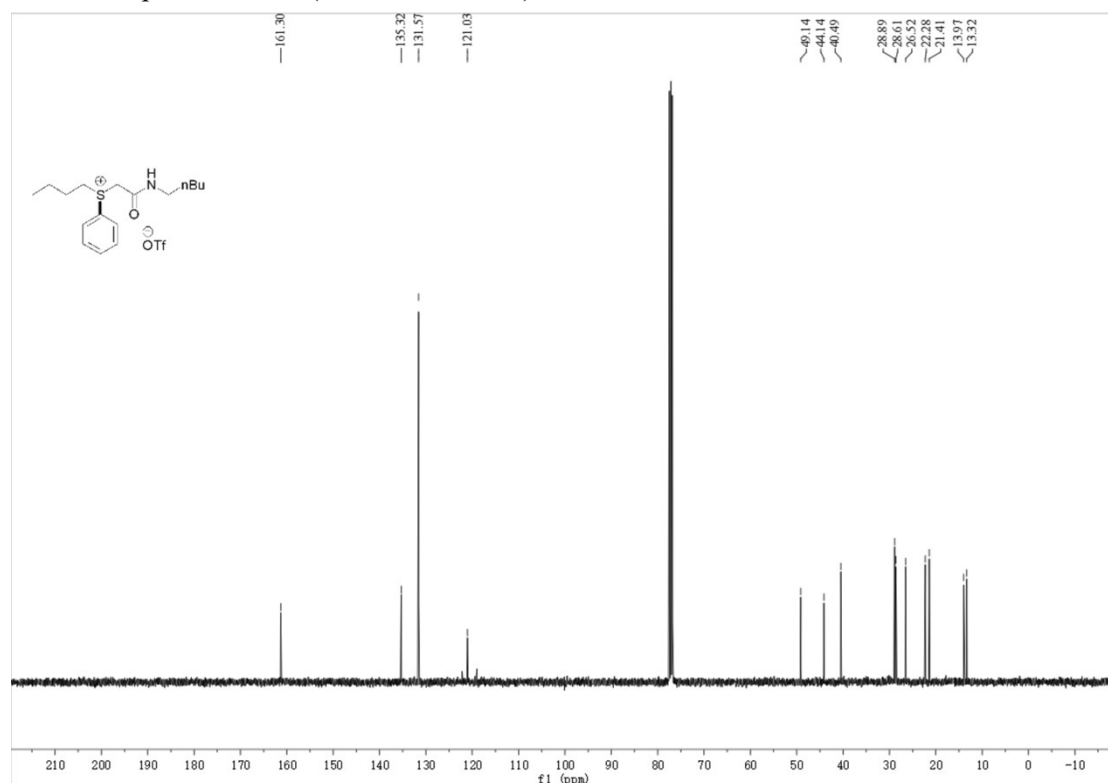

$^1\text{H}$  NMR spectrum of **3u** ( $\text{CDCl}_3$ , 400 MHz)

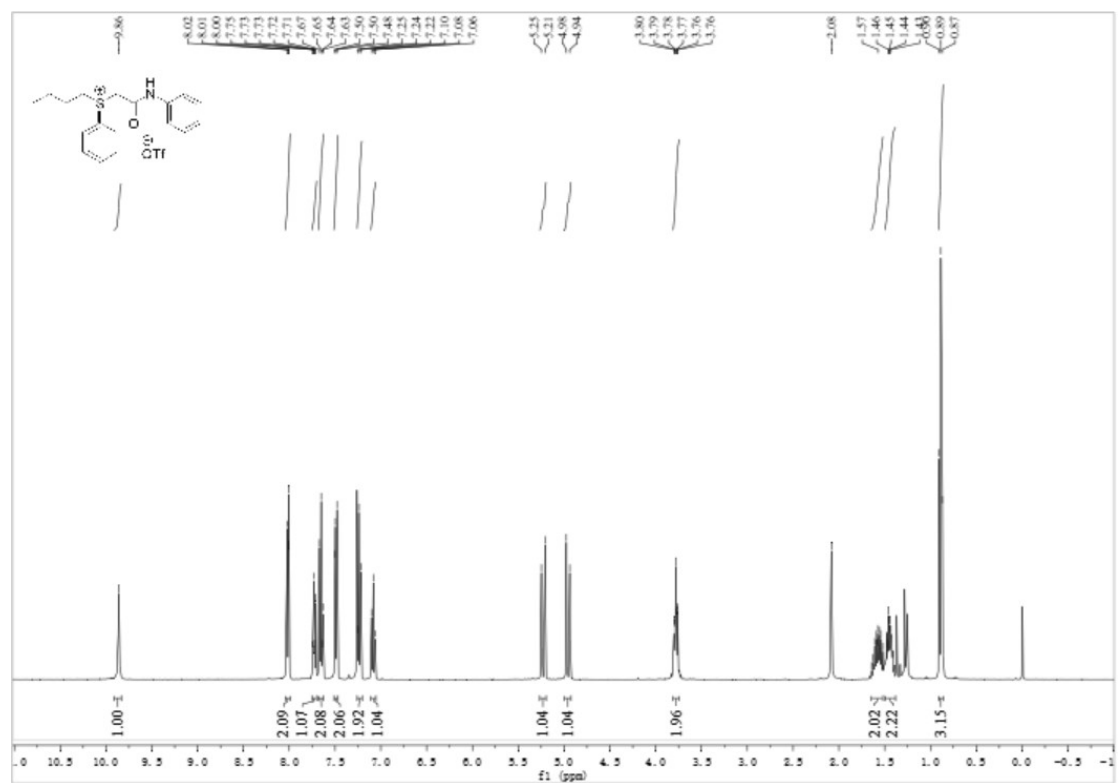

$^{13}\text{C}$  NMR spectrum of **3u** ( $\text{CDCl}_3$ , 101 MHz)

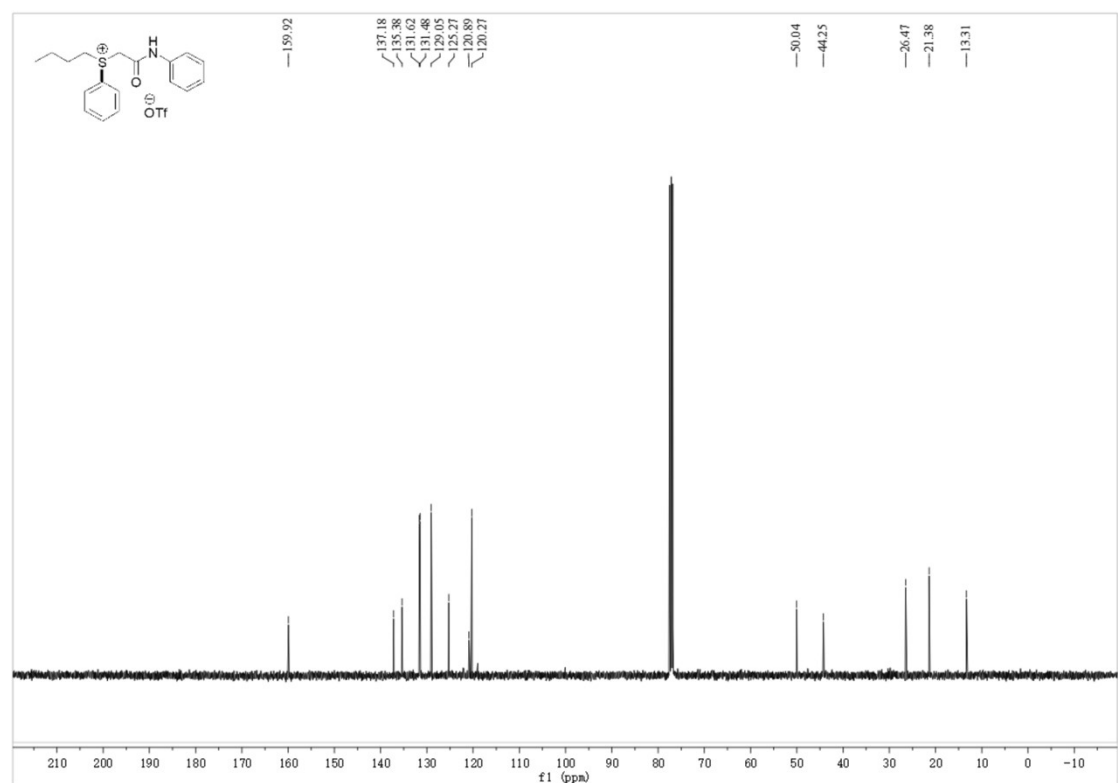

$^1\text{H}$  NMR spectrum of **3v** ( $\text{CDCl}_3$ , 400 MHz)

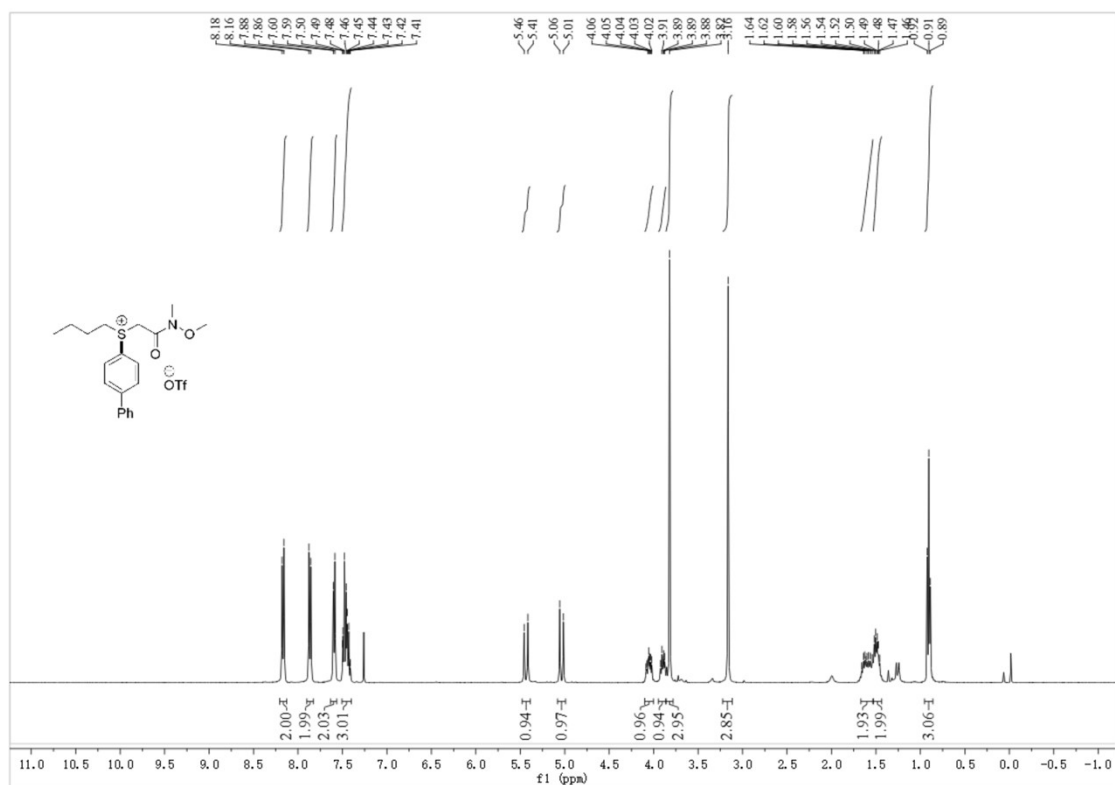

$^{13}\text{C}$  NMR spectrum of **3v** ( $\text{CDCl}_3$ , 101 MHz)

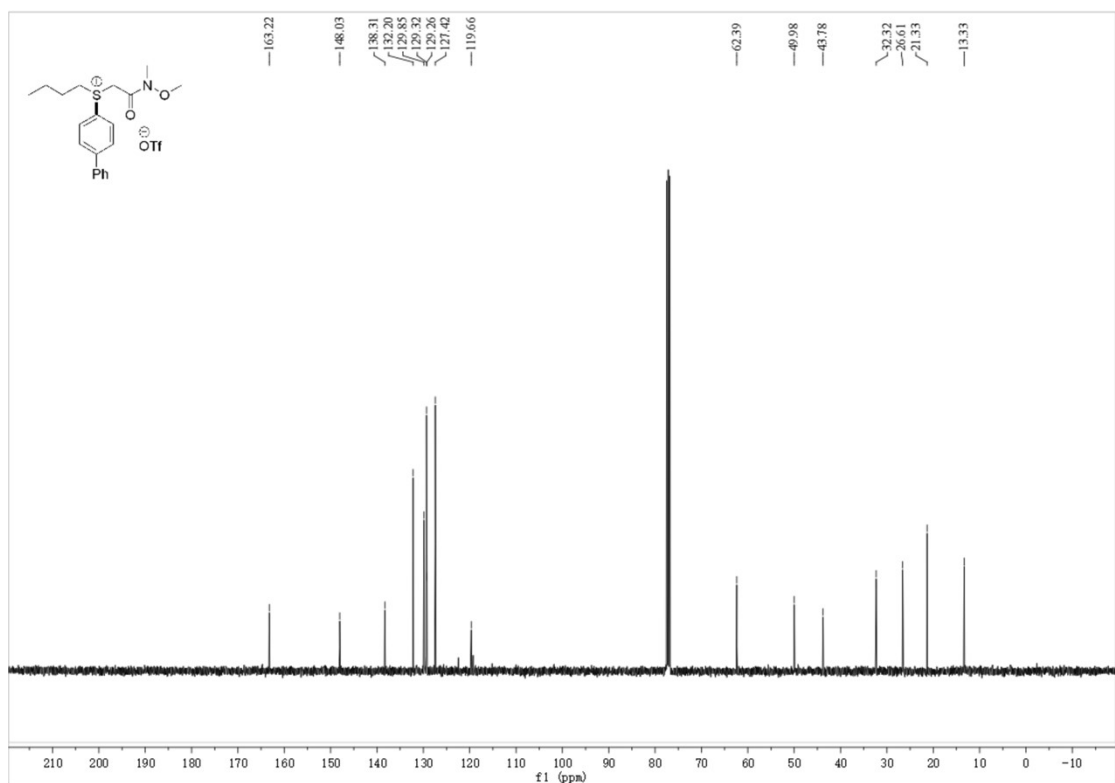

$^1\text{H}$  NMR spectrum of **3w** ( $\text{CDCl}_3$ , 400 MHz)

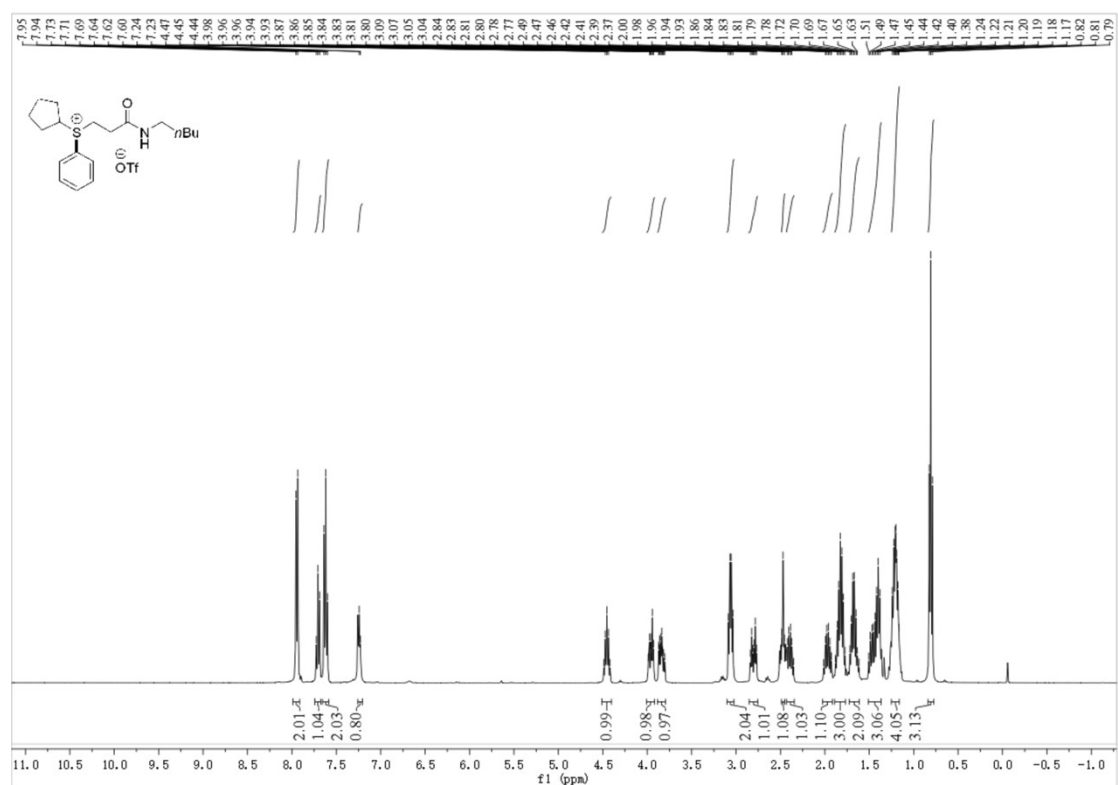

$^{13}\text{C}$  NMR spectrum of **3w** ( $\text{CDCl}_3$ , 101 MHz)

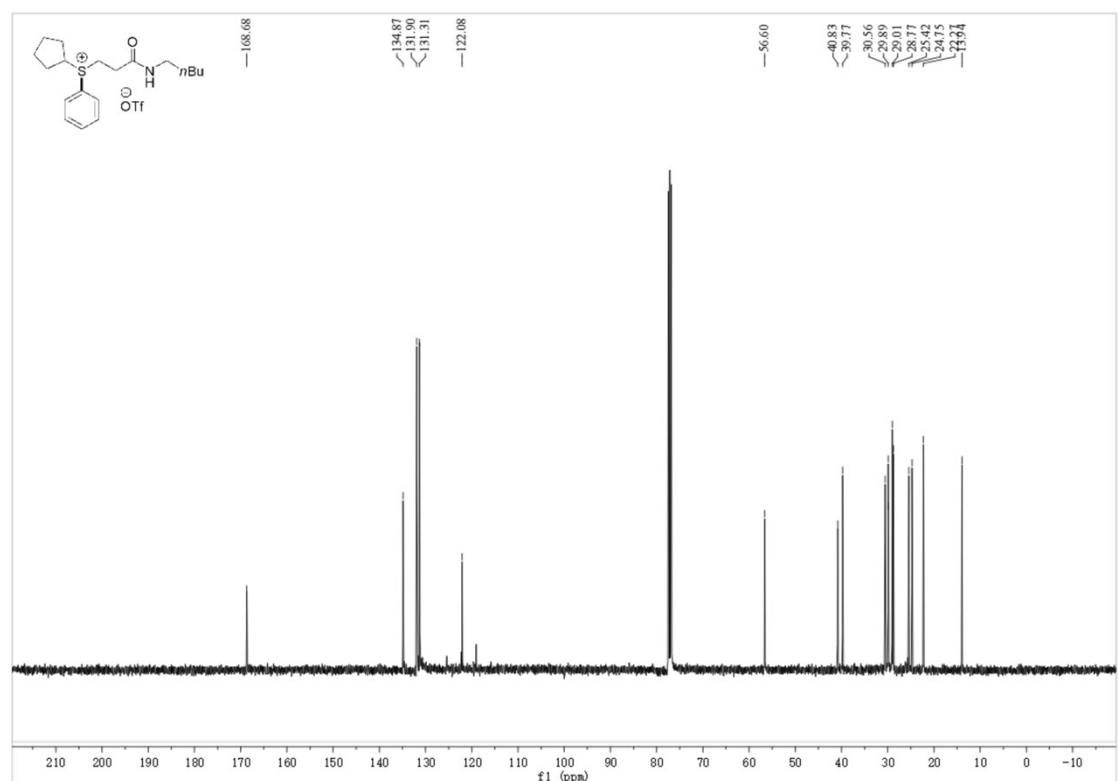

$^1\text{H}$  NMR spectrum of **3x** ( $\text{CDCl}_3$ , 400 MHz)

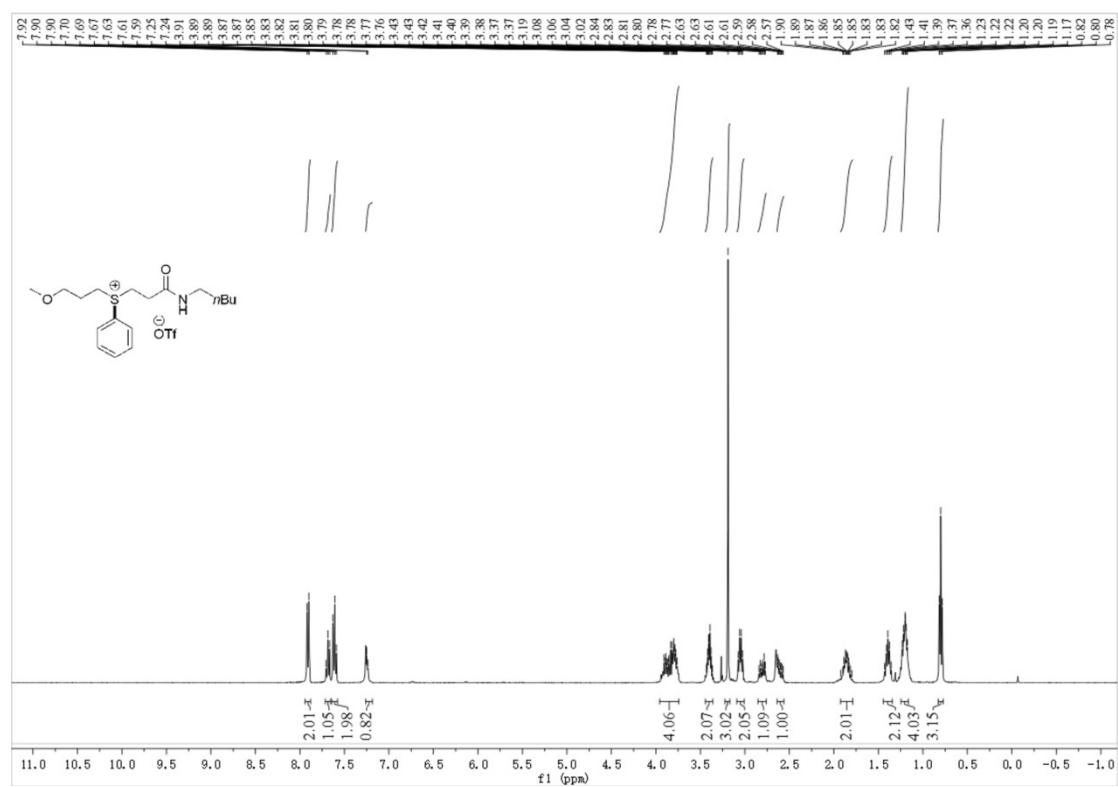

$^{13}\text{C}$  NMR spectrum of **3x** ( $\text{CDCl}_3$ , 101 MHz)

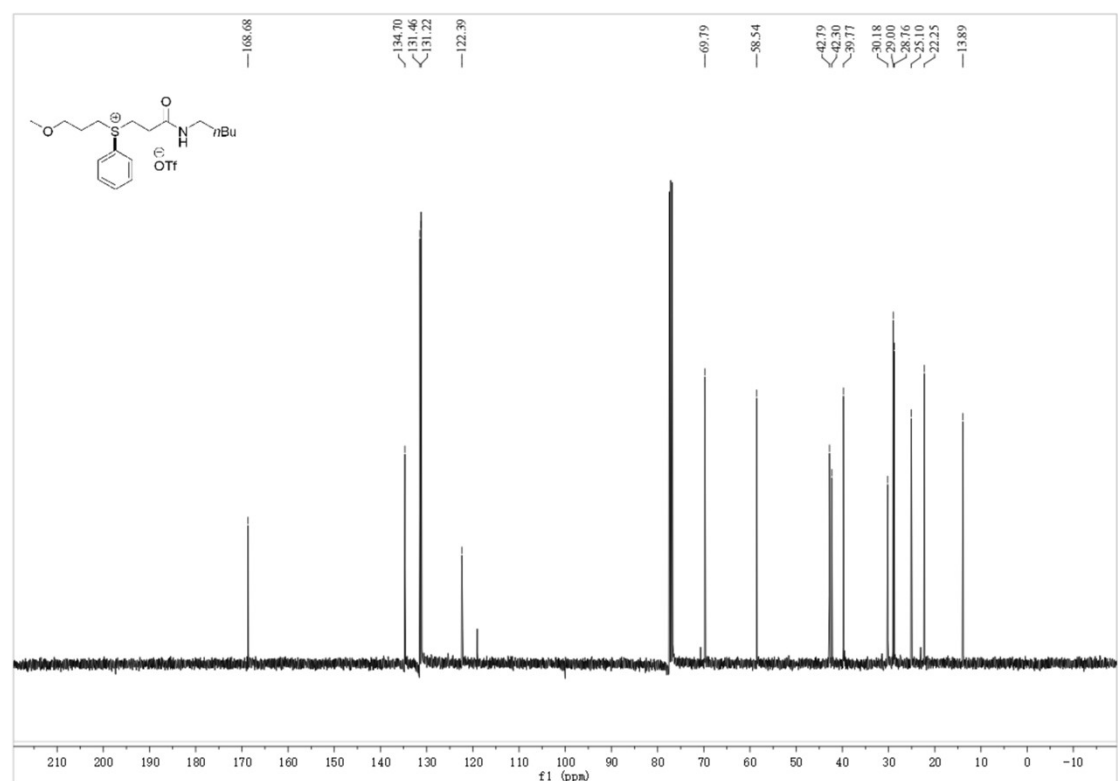



$^1\text{H}$  NMR spectrum of **3z** ( $\text{CDCl}_3$ , 400 MHz)

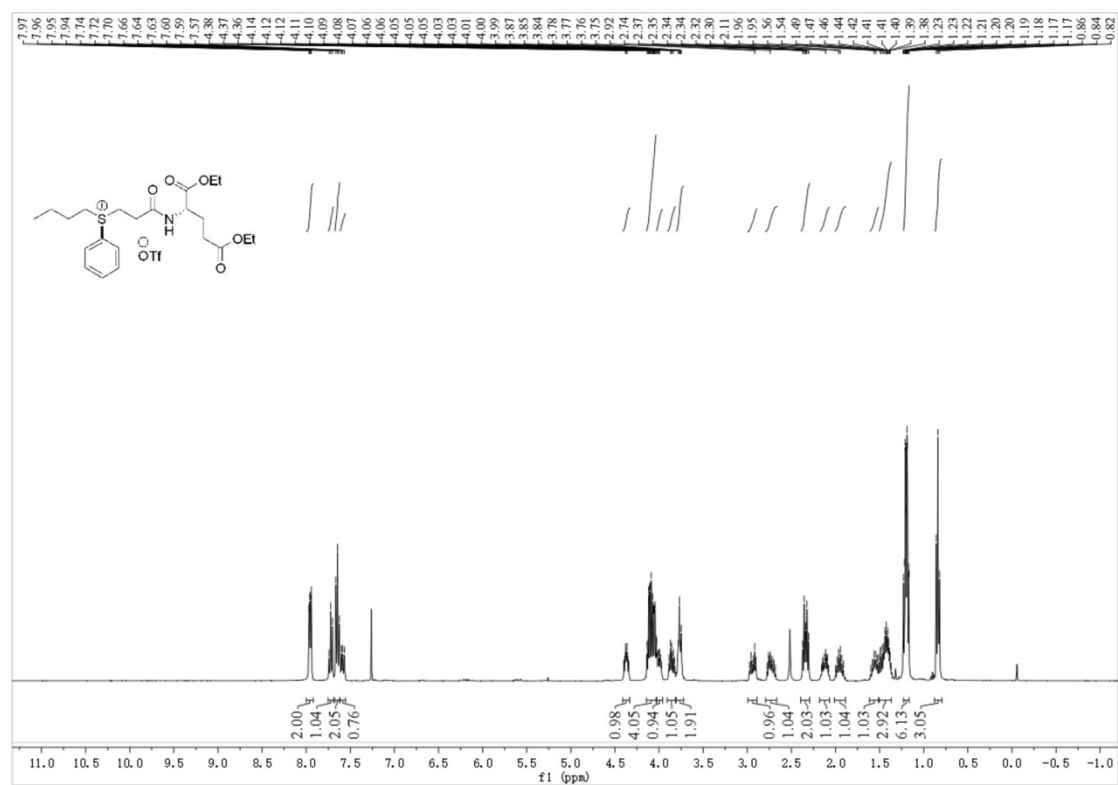

$^{13}\text{C}$  NMR spectrum of **3z** ( $\text{CDCl}_3$ , 101 MHz)

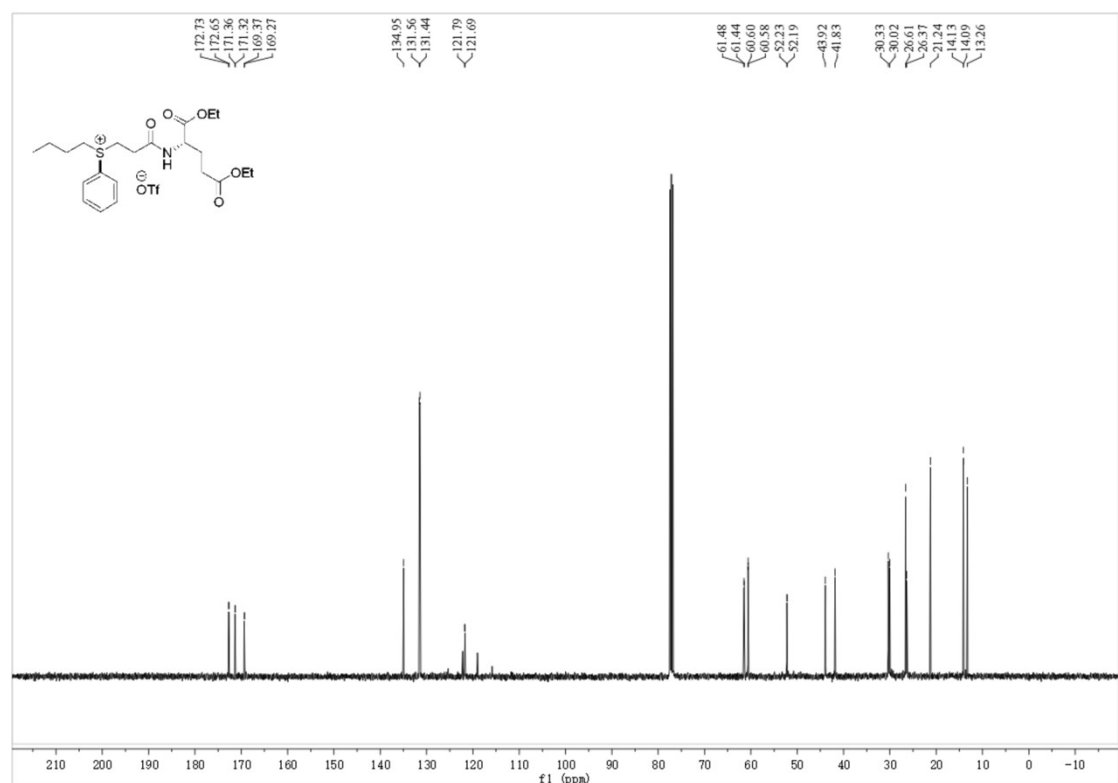

$^1\text{H}$  NMR spectrum of **3aa** ( $\text{CDCl}_3$ , 400 MHz)

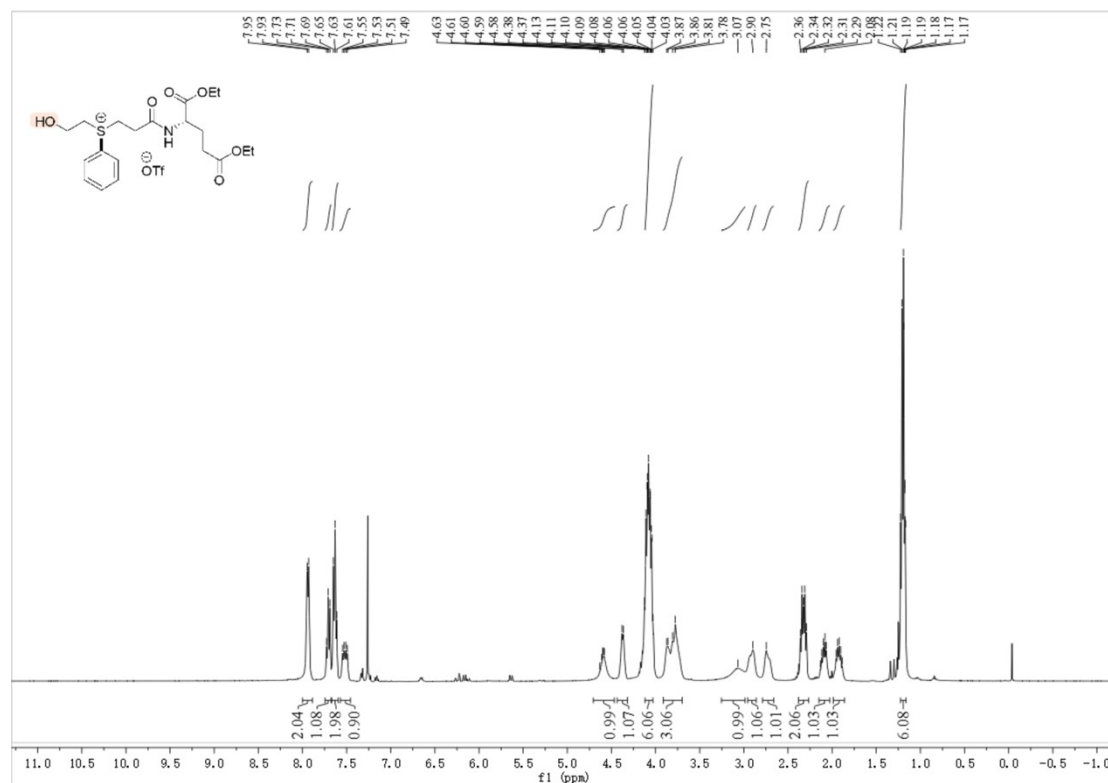

$^{13}\text{C}$  NMR spectrum of **3aa** ( $\text{CDCl}_3$ , 101 MHz)

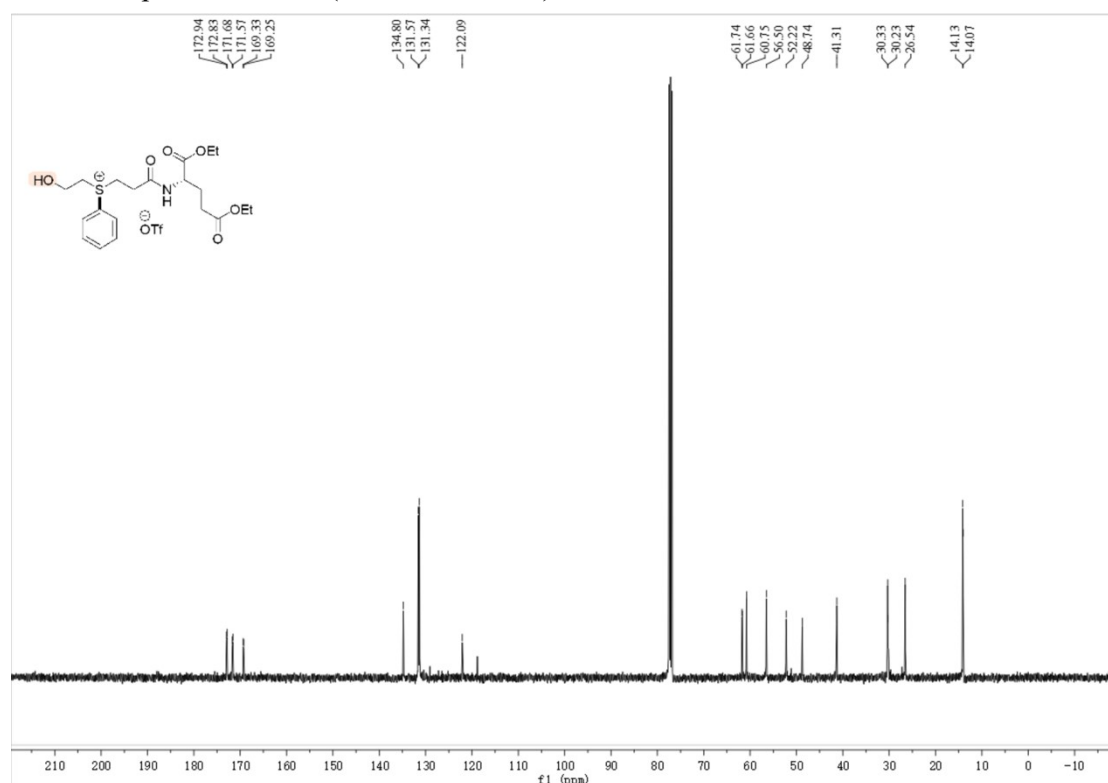

<sup>1</sup>H NMR spectrum of **3ab** (CDCl<sub>3</sub>, 400 MHz)

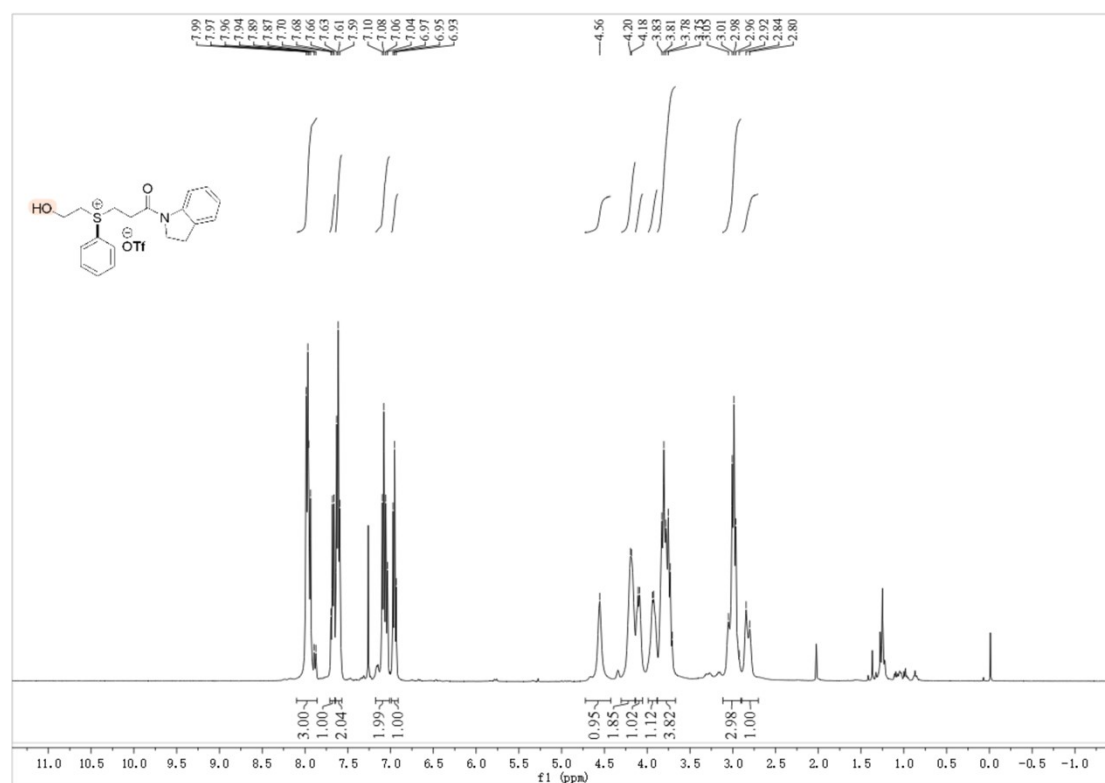

<sup>13</sup>C NMR spectrum of **3ab** (CDCl<sub>3</sub>, 101 MHz)

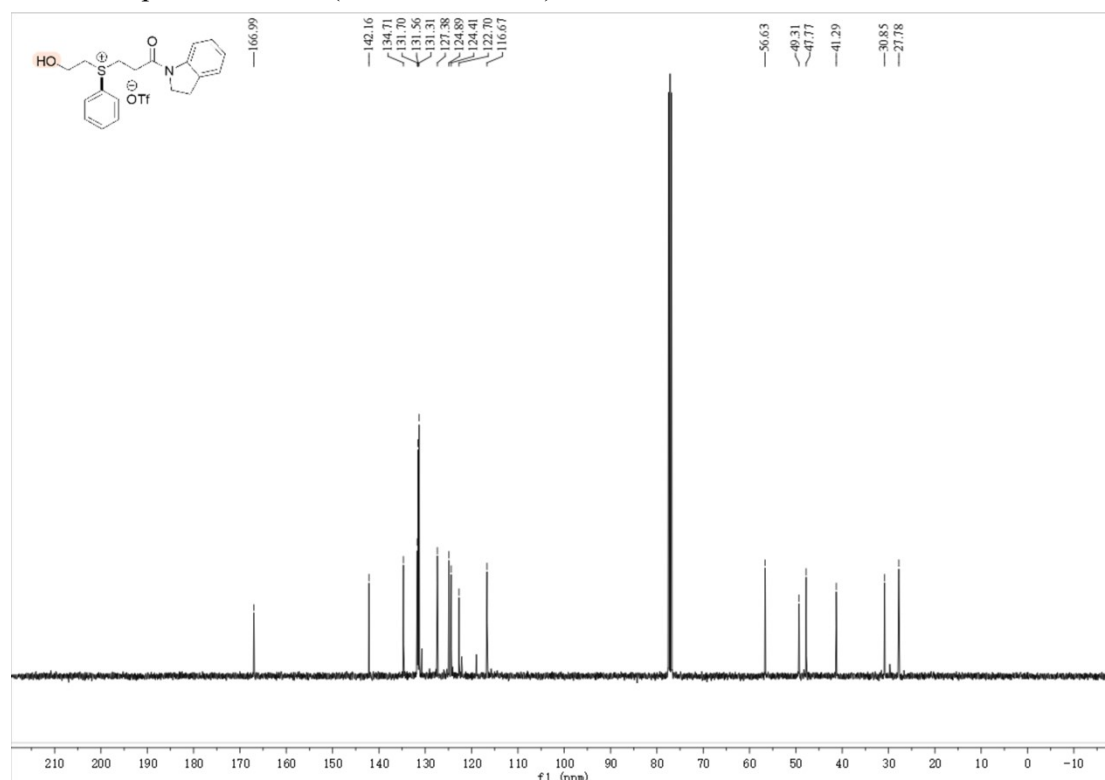

<sup>1</sup>H NMR spectrum of **3ac** (CDCl<sub>3</sub>, 400 MHz)

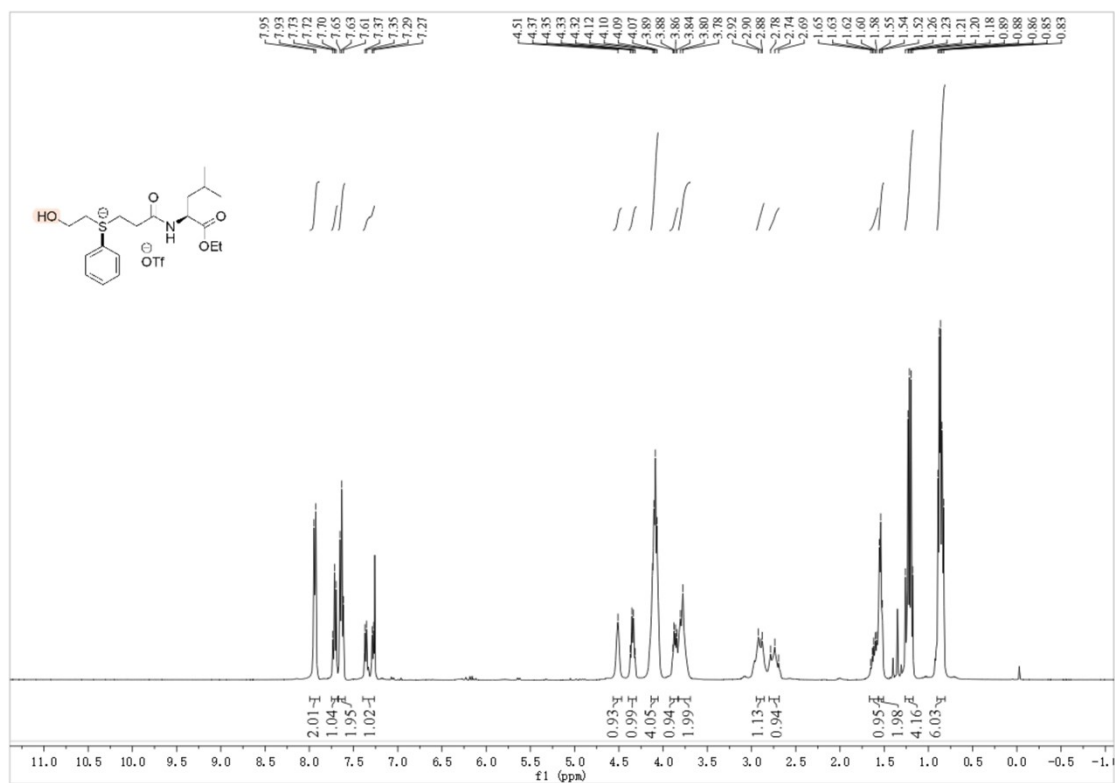

<sup>13</sup>C NMR spectrum of **3ac** (CDCl<sub>3</sub>, 101 MHz)

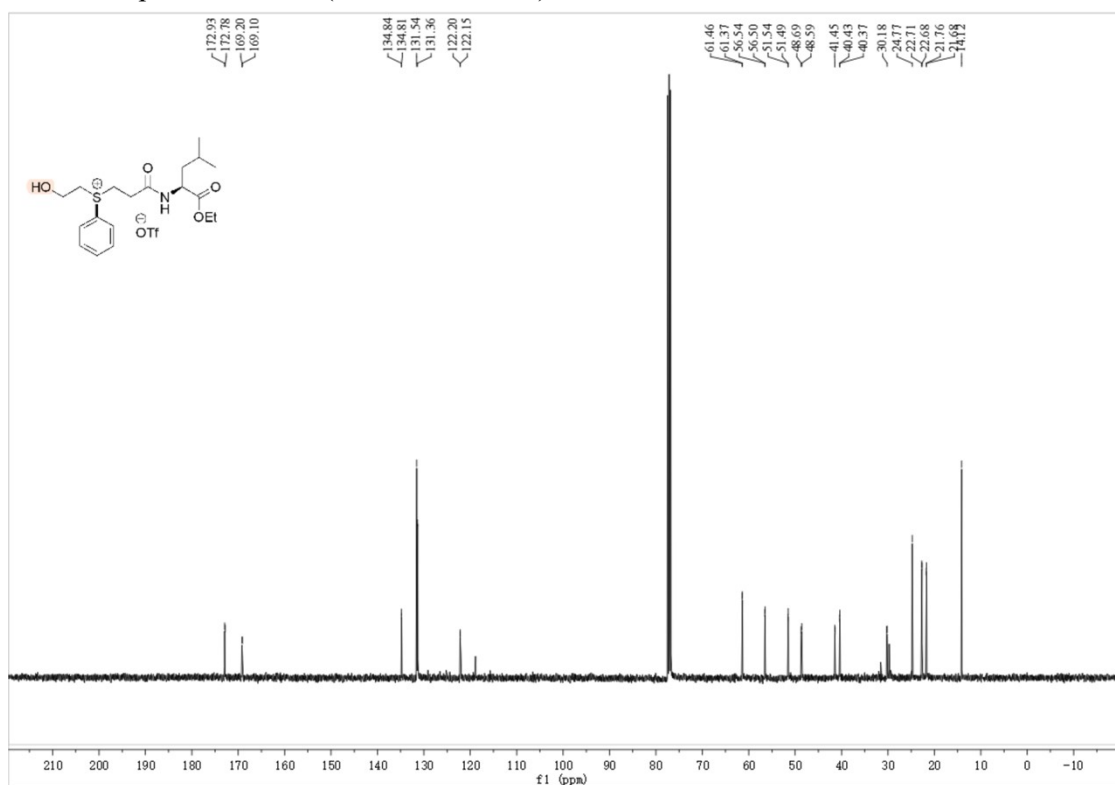

$^1\text{H}$  NMR spectrum of **3ad** ( $\text{CDCl}_3$ , 400 MHz)

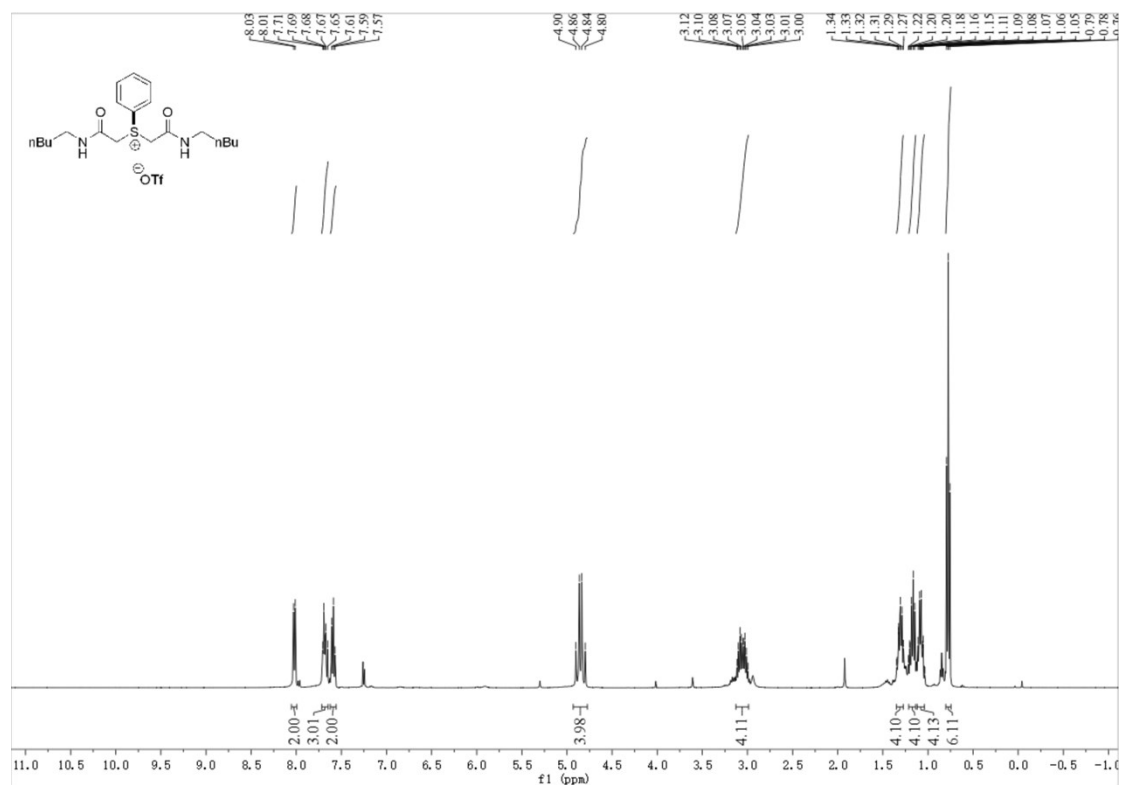

$^{13}\text{C}$  NMR spectrum of **3ad** ( $\text{CDCl}_3$ , 101 MHz)

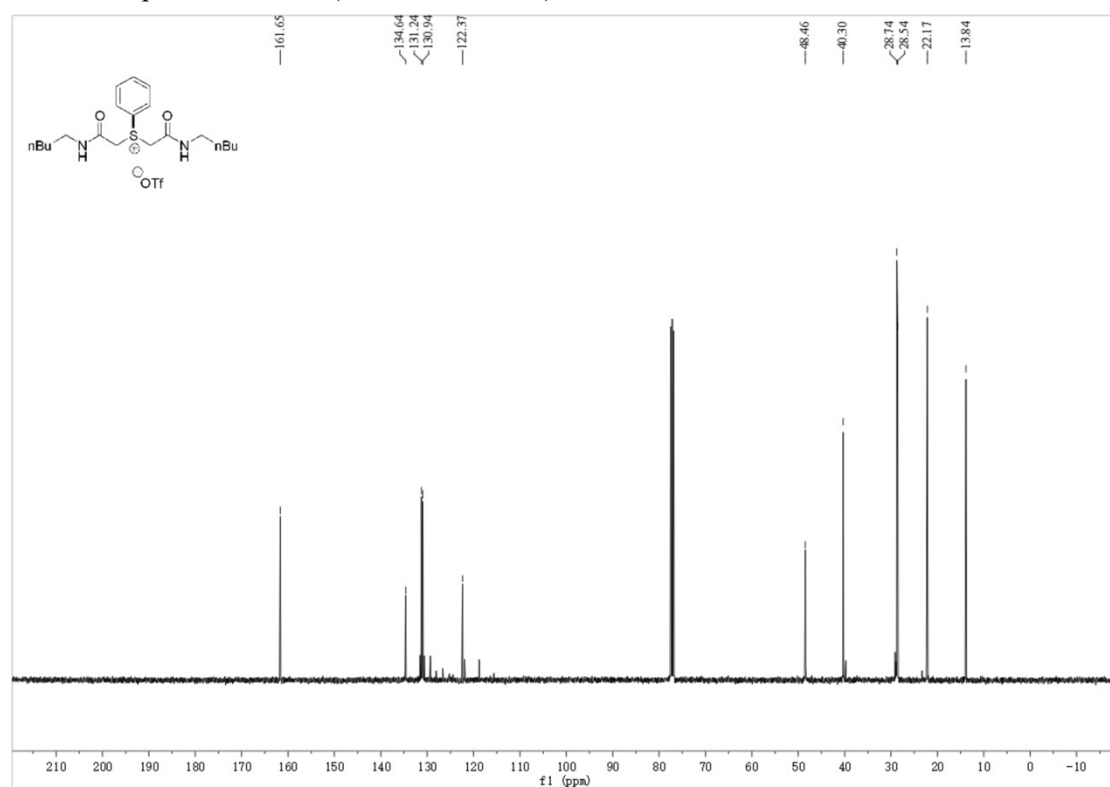

<sup>1</sup>H NMR spectrum of **3ae** (*d*-DMSO, 400 MHz)

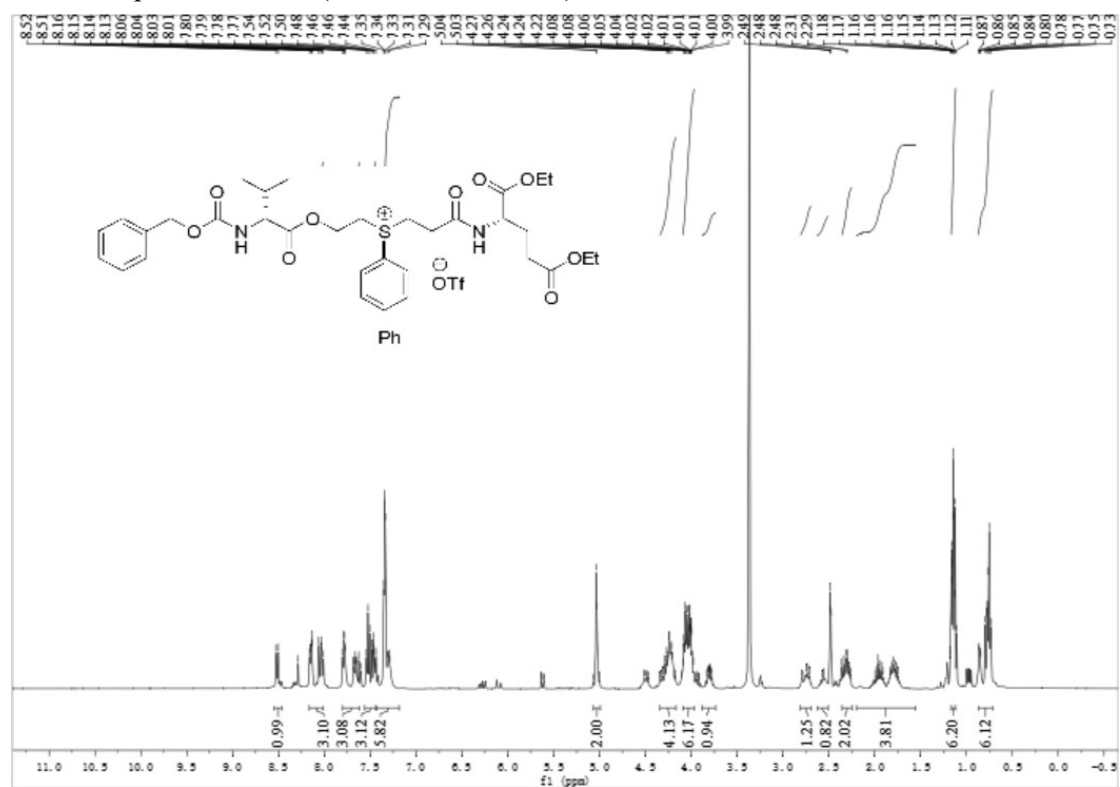

<sup>13</sup>C NMR spectrum of **3ae** (*d*-DMSO, 101 MHz)

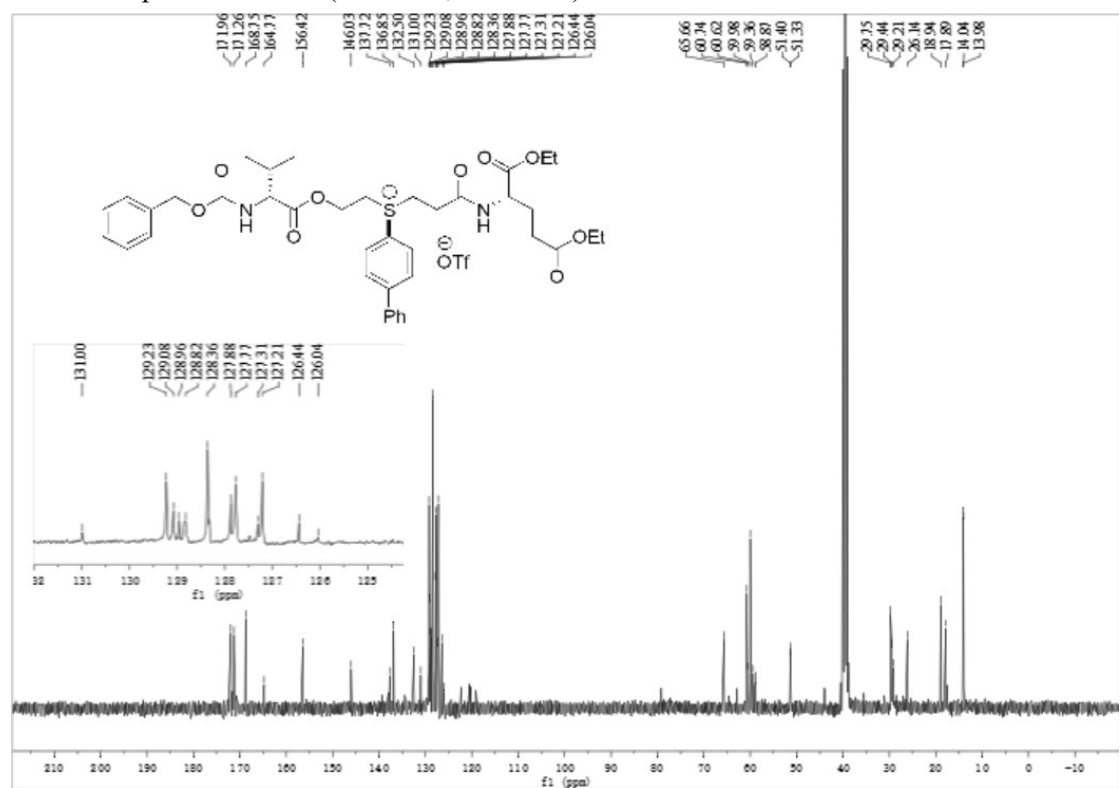

$^1\text{H}$  NMR spectrum of **3af** ( $\text{CDCl}_3$ , 400 MHz)

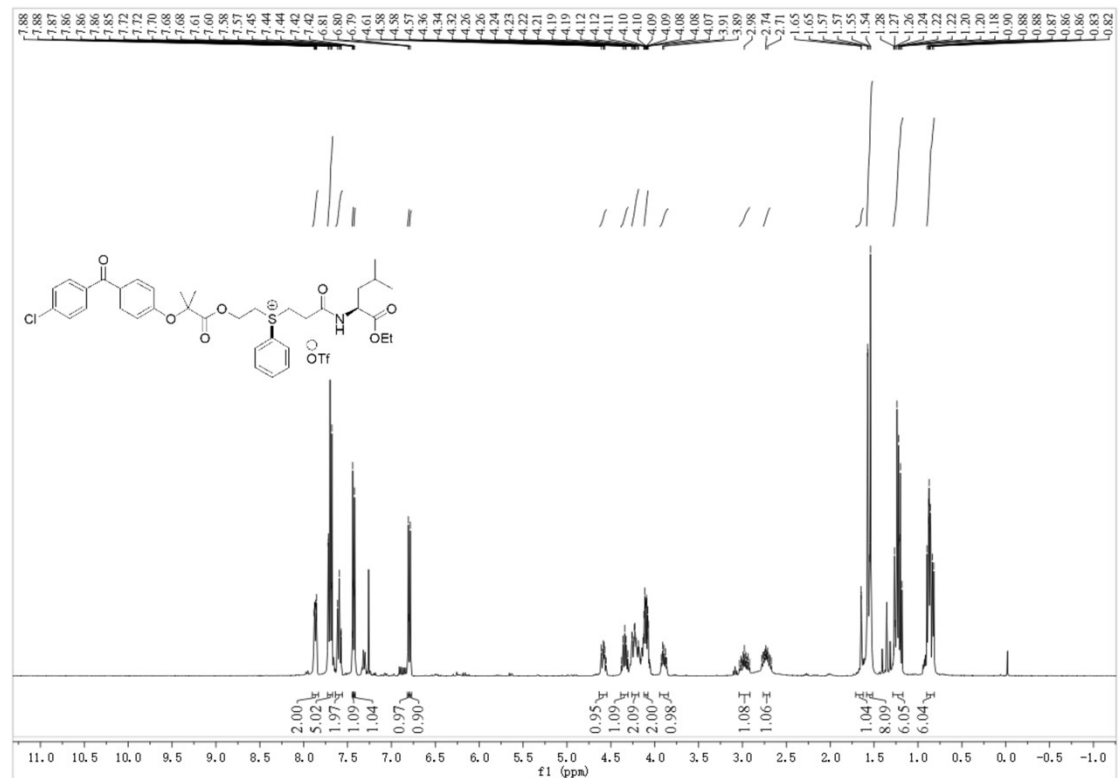

$^{13}\text{C}$  NMR spectrum of **3af** ( $\text{CDCl}_3$ , 101 MHz)

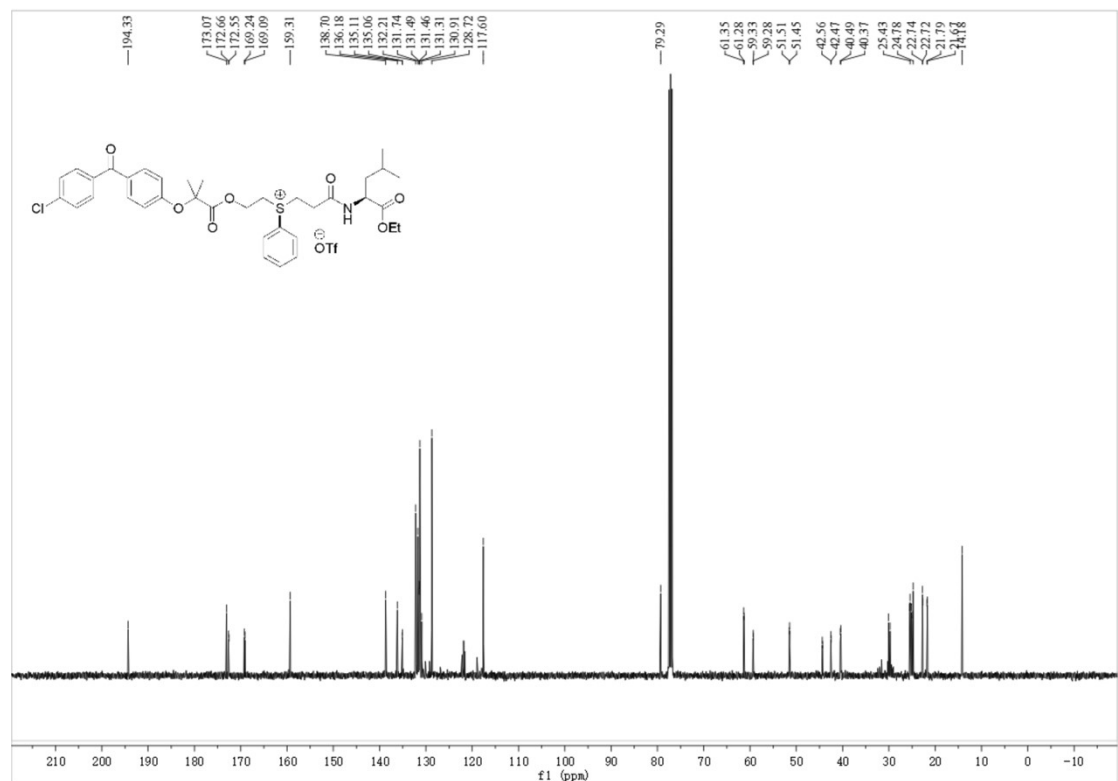

$^1\text{H}$  NMR spectrum of **3ag** ( $\text{CDCl}_3$ , 400 MHz)

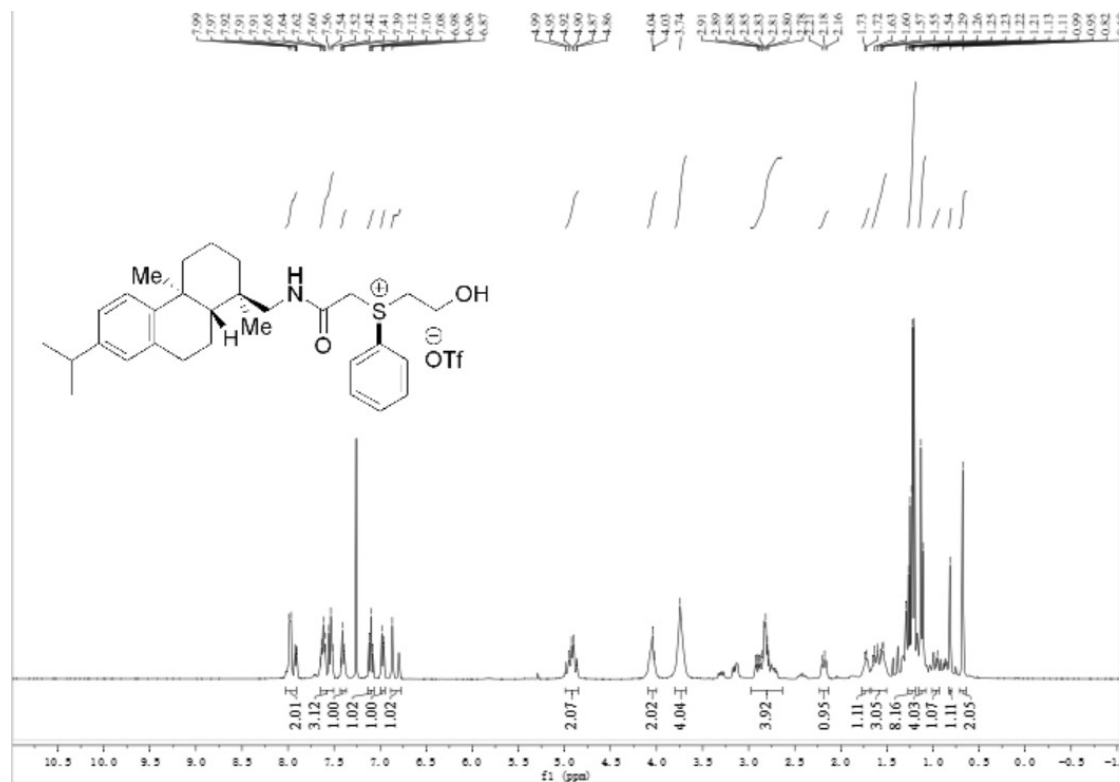

$^{13}\text{C}$  NMR spectrum of **3ag** ( $\text{CDCl}_3$ , 101 MHz)

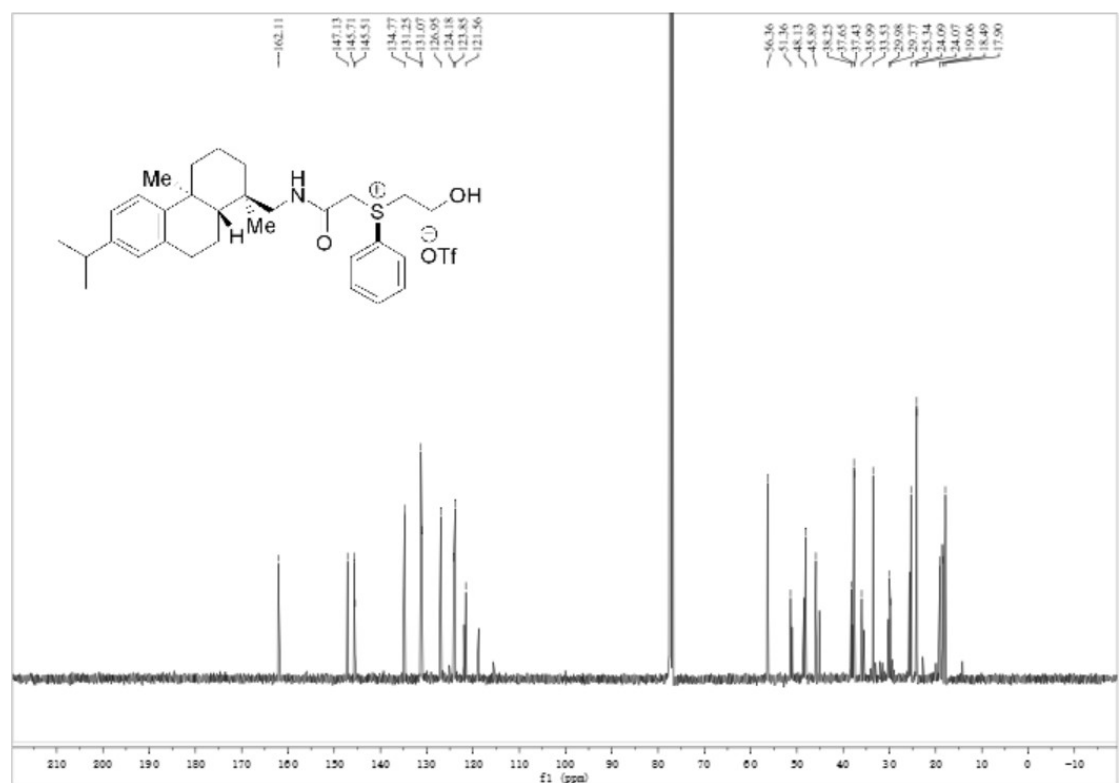

$^1\text{H}$  NMR spectrum of **3ah** ( $\text{CDCl}_3$ , 400 MHz)

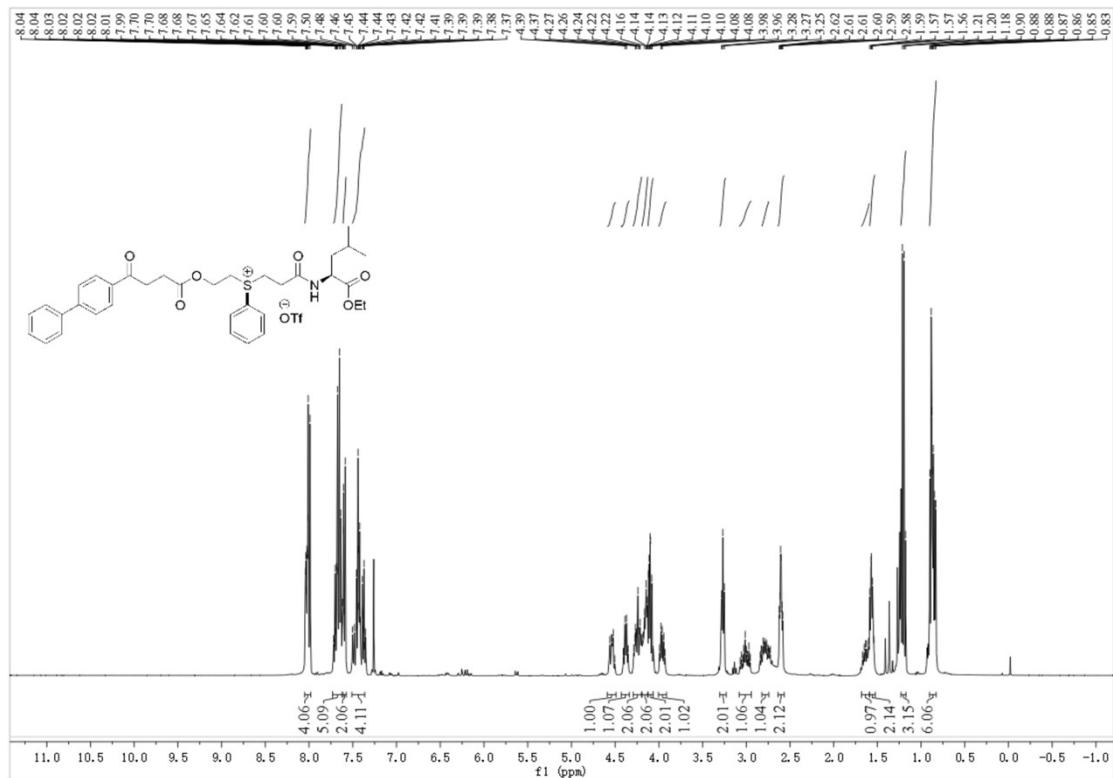

$^{13}\text{C}$  NMR spectrum of **3ah** ( $\text{CDCl}_3$ , 101 MHz)

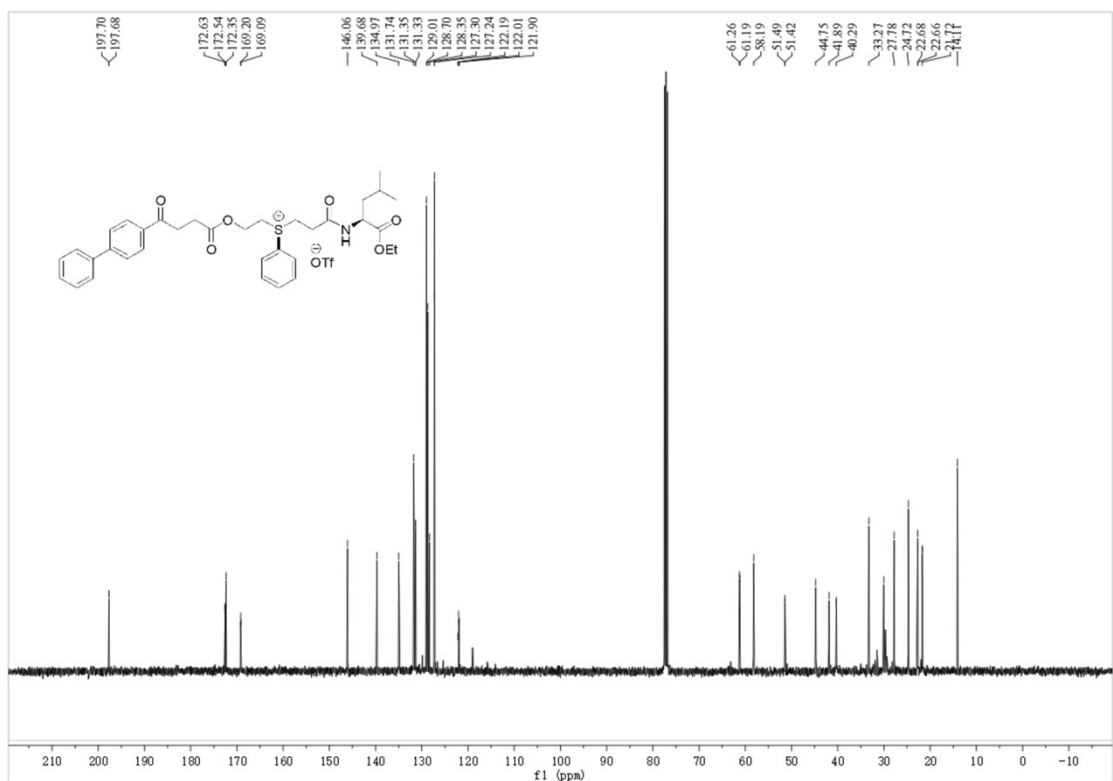

$^1\text{H}$  NMR spectrum of **3ai** ( $\text{CDCl}_3$ , 400 MHz)

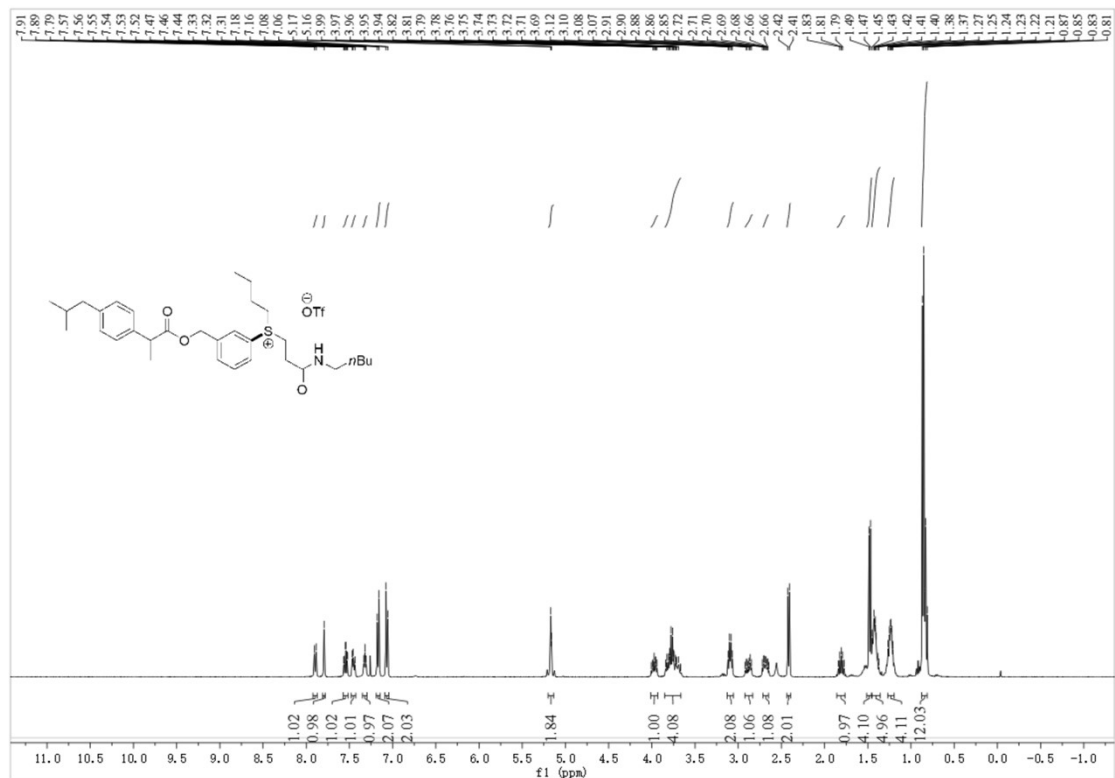

$^{13}\text{C}$  NMR spectrum of **3ai** ( $\text{CDCl}_3$ , 101 MHz)

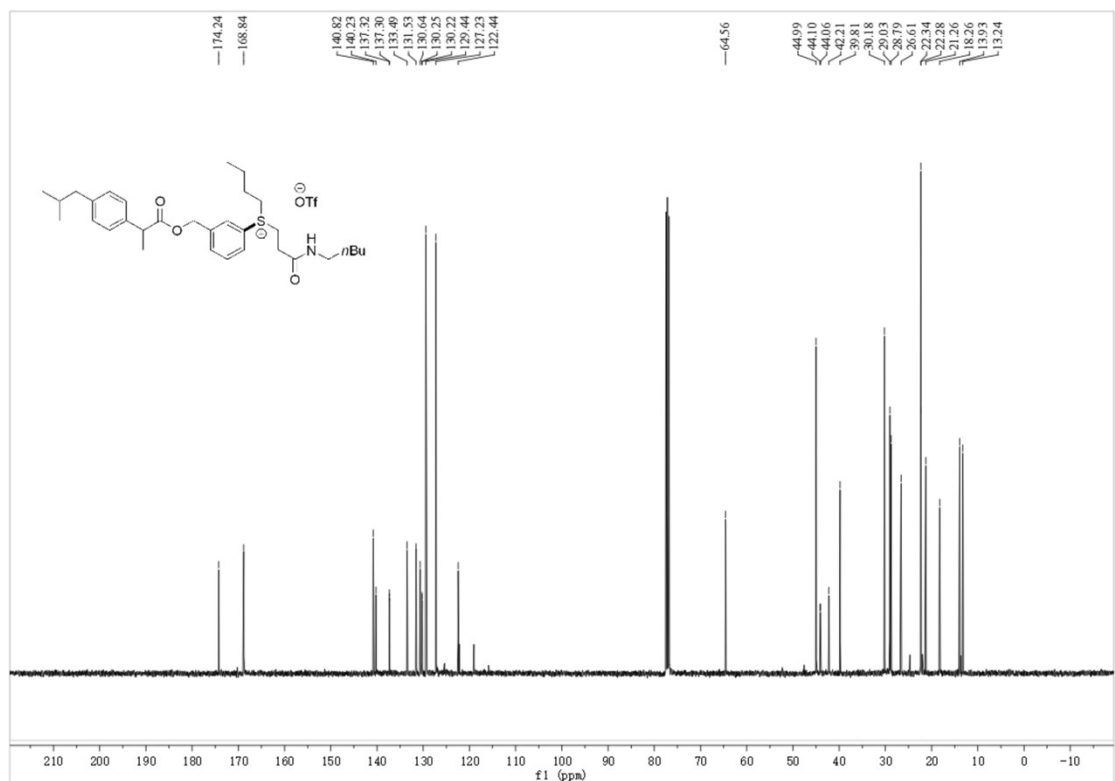

$^1\text{H}$  NMR spectrum of **3aj** ( $\text{CDCl}_3$ , 400 MHz)

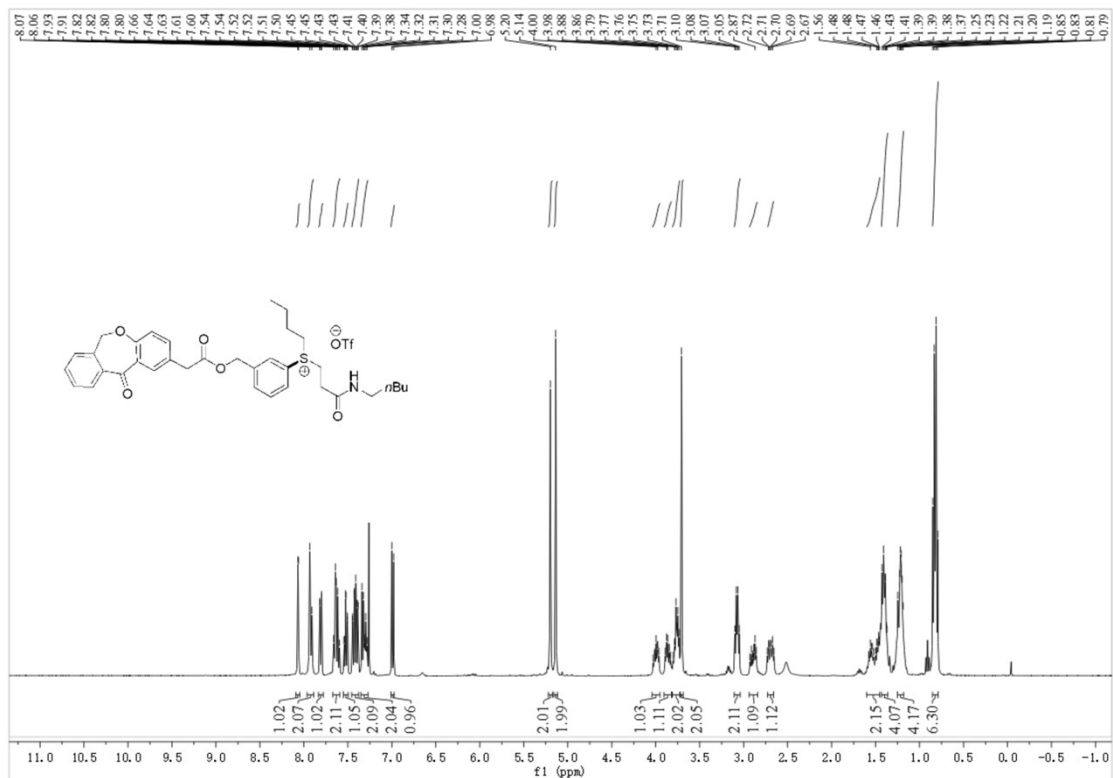

$^{13}\text{C}$  NMR spectrum of **3aj** ( $\text{CDCl}_3$ , 101 MHz)

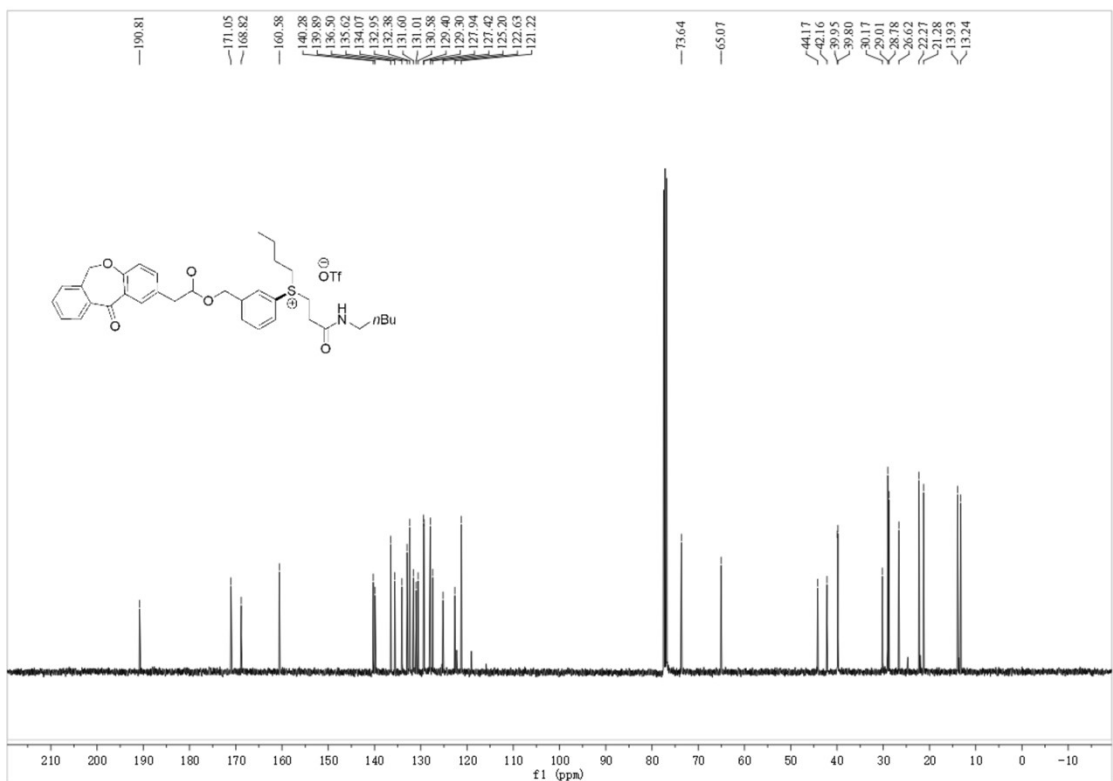



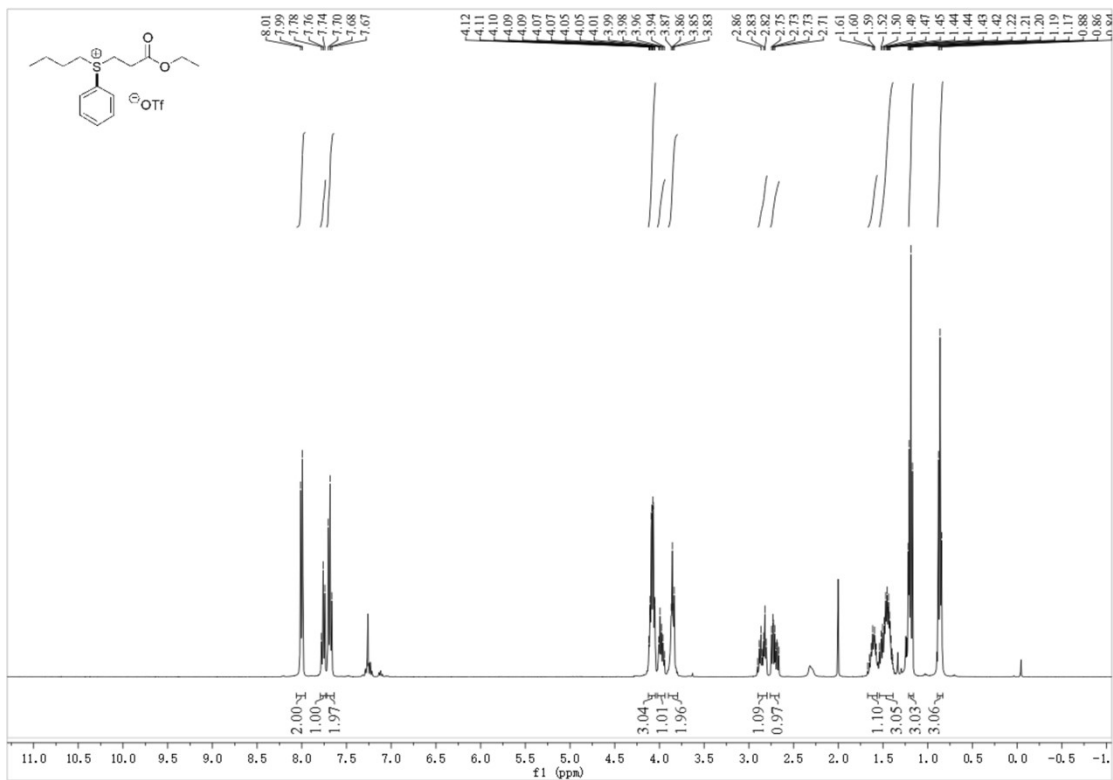

**<sup>13</sup>C NMR spectrum of 1a''' (CDCl<sub>3</sub>, 101 MHz)**

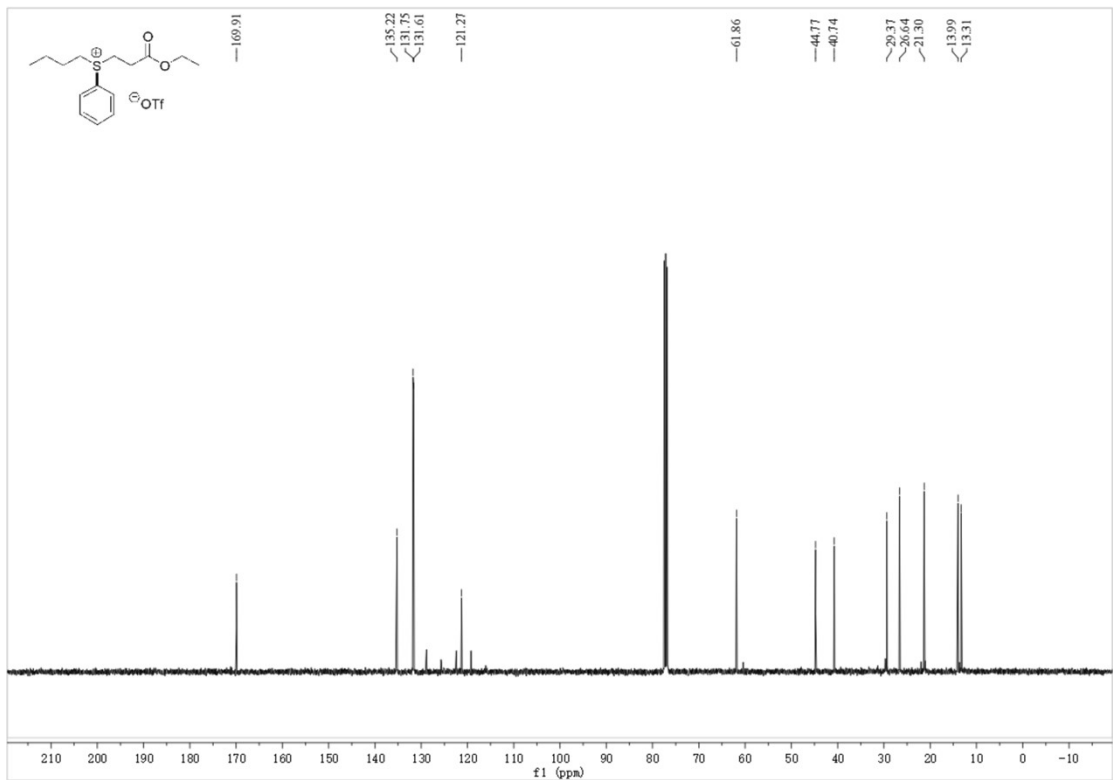

$^1\text{H}$  NMR spectrum of **1a** ( $\text{CDCl}_3$ , 400 MHz)

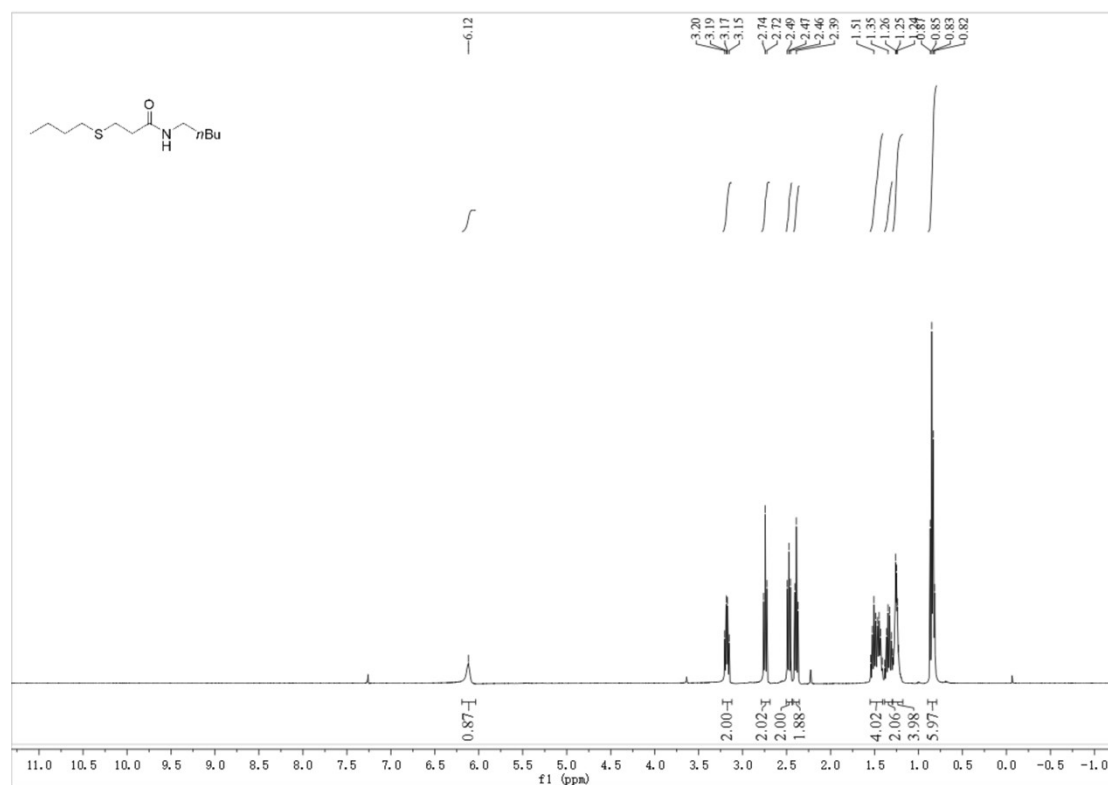

$^{13}\text{C}$  NMR spectrum of **1a** ( $\text{CDCl}_3$ , 101 MHz)

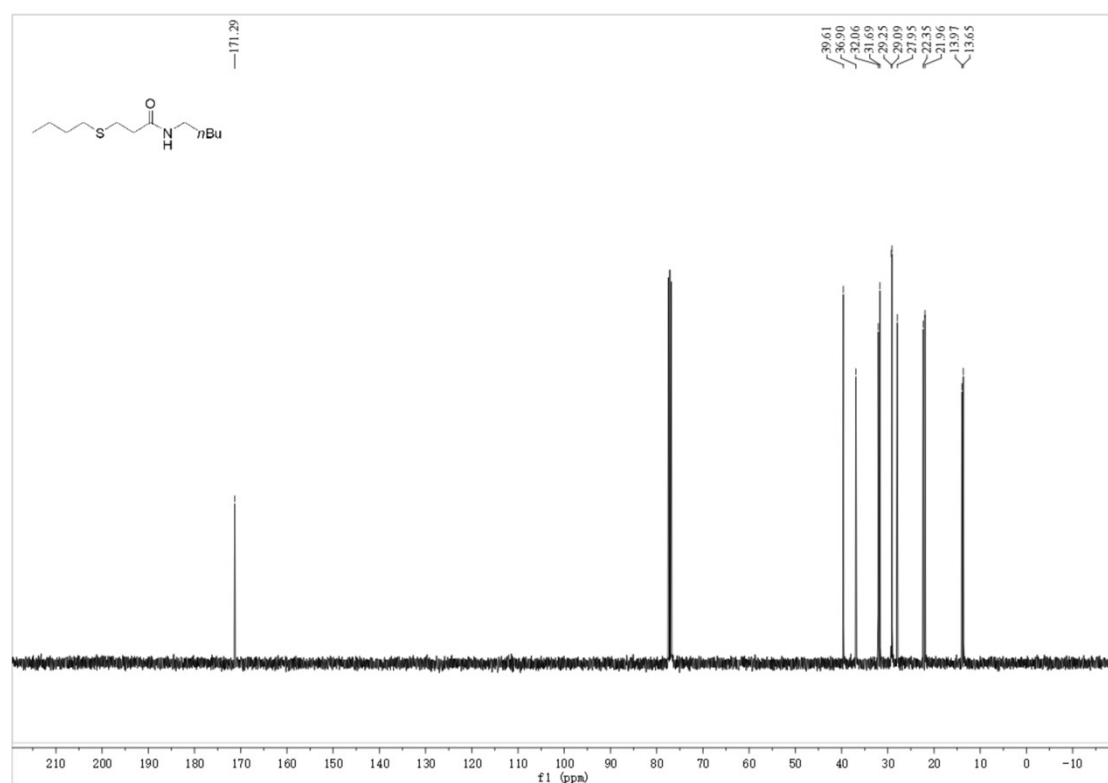

$^1\text{H}$  NMR spectrum of **1p** ( $\text{CDCl}_3$ , 400 MHz)

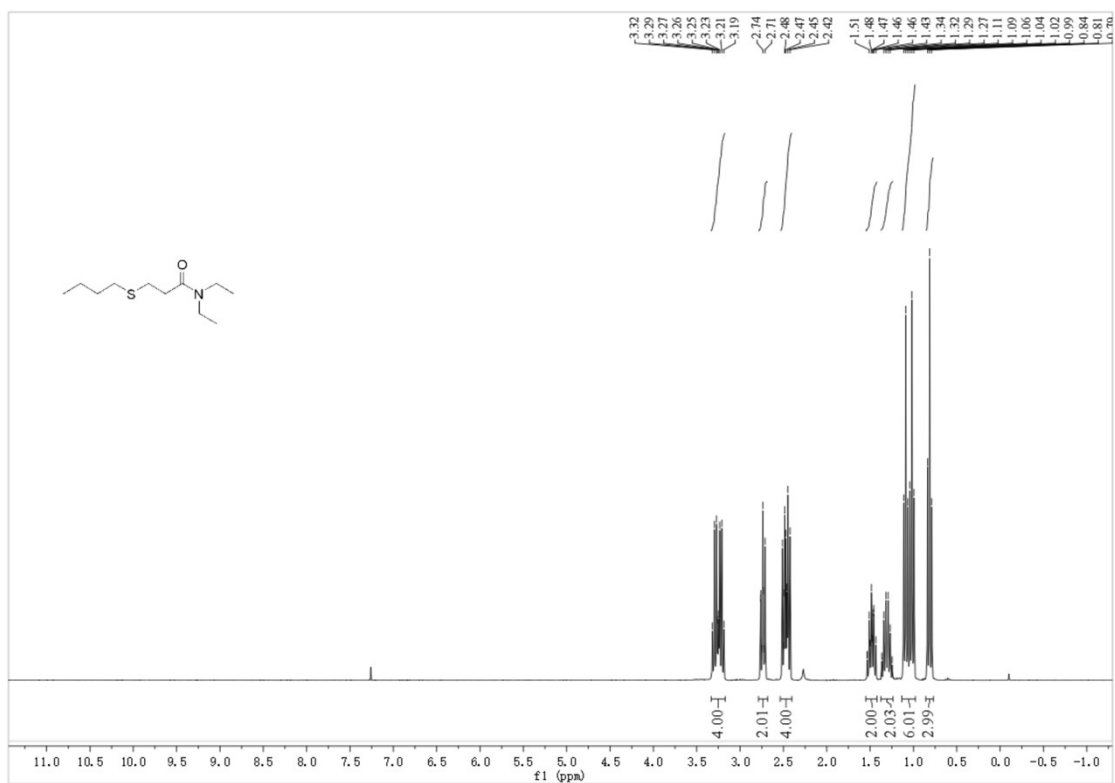

$^{13}\text{C}$  NMR spectrum of **1p** ( $\text{CDCl}_3$ , 101 MHz)

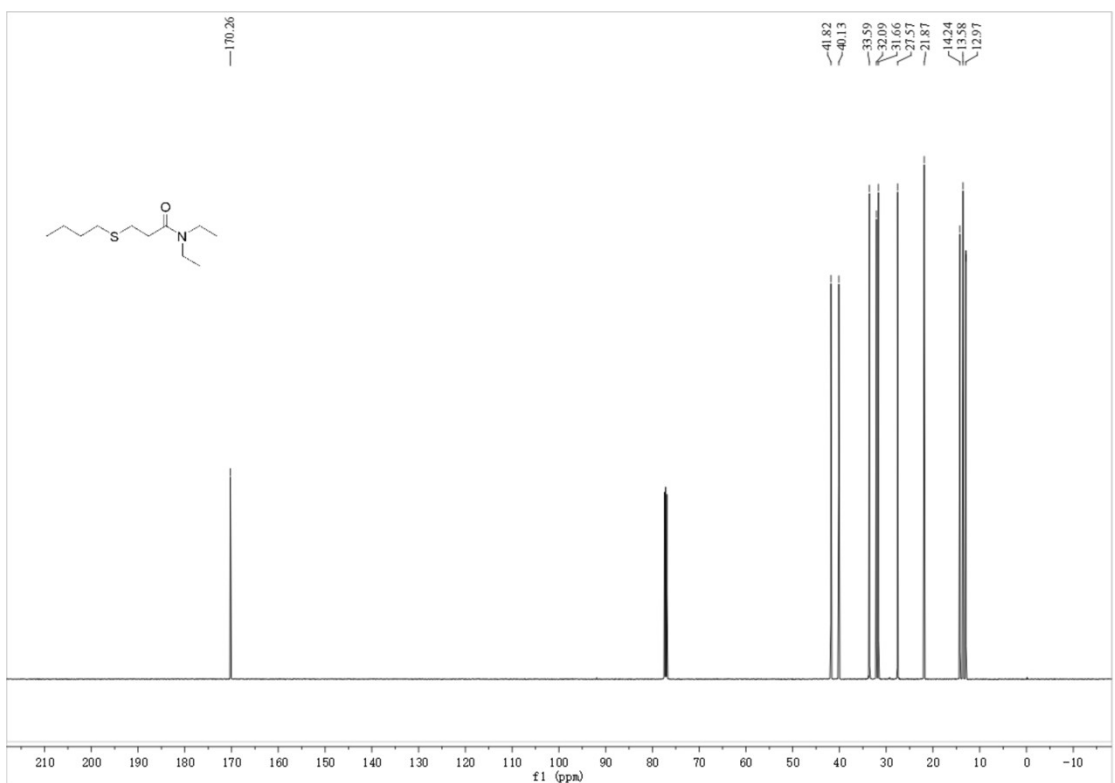

$^1\text{H}$  NMR spectrum of **1q** ( $\text{CDCl}_3$ , 400 MHz)

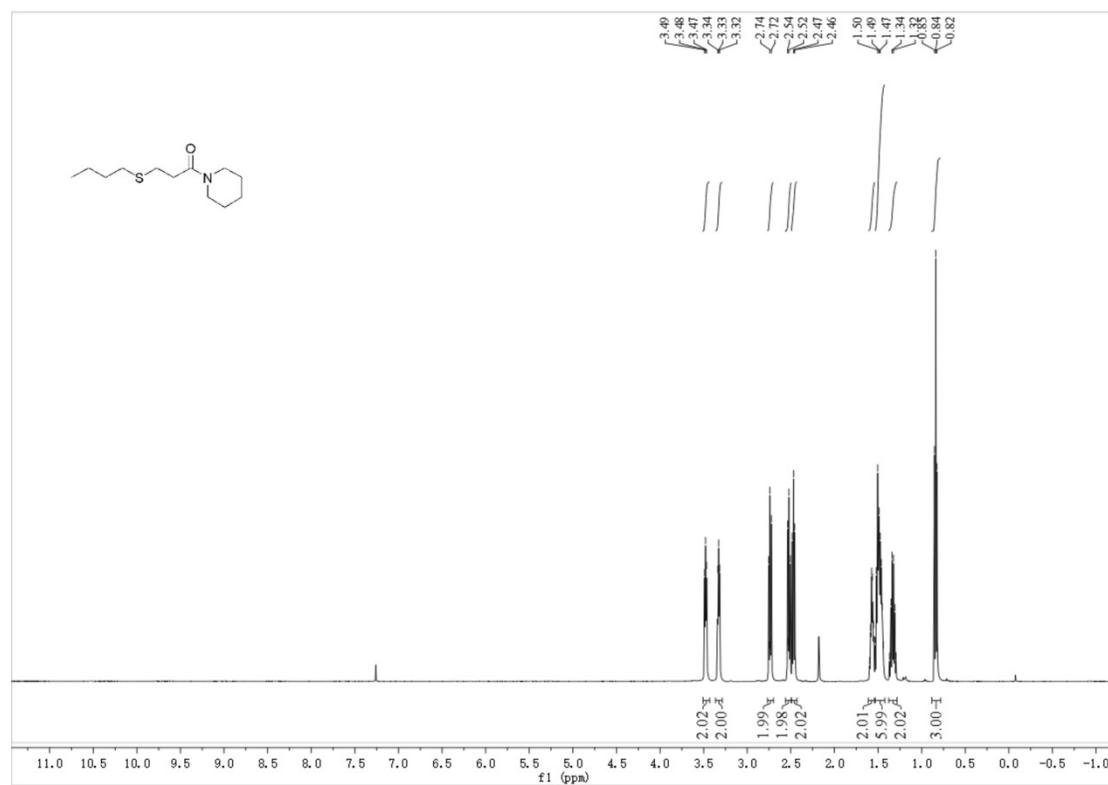

$^{13}\text{C}$  NMR spectrum of **1q** ( $\text{CDCl}_3$ , 101 MHz)

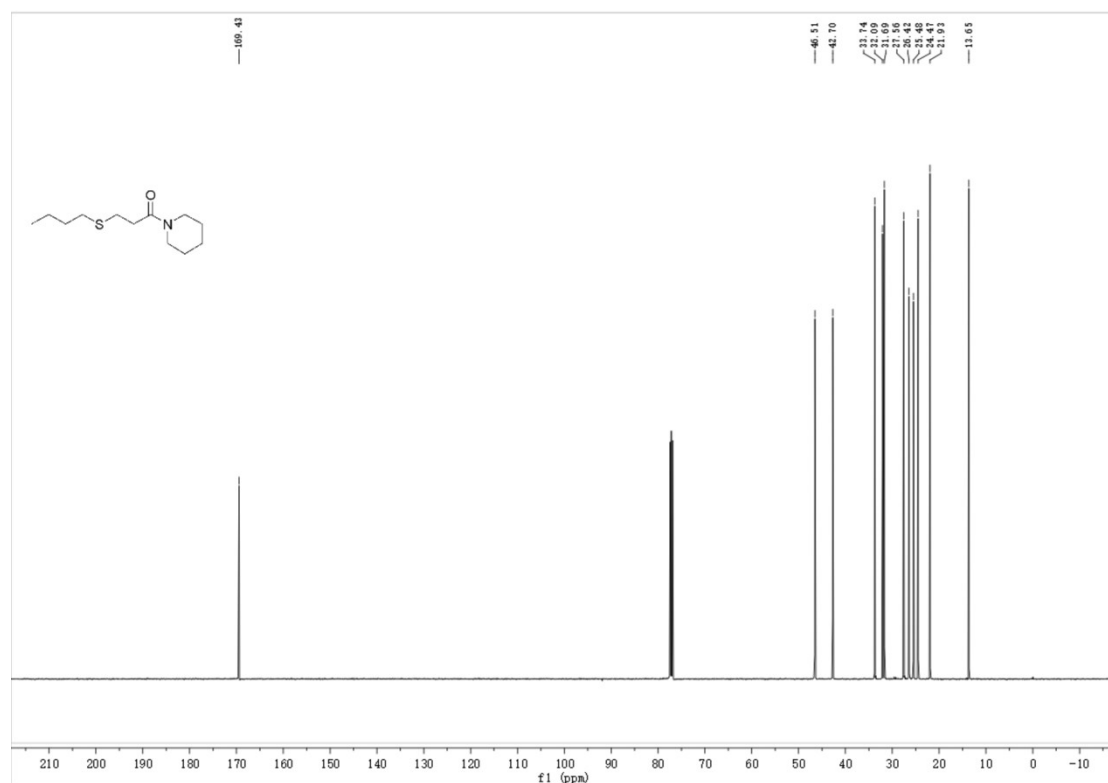

$^1\text{H}$  NMR spectrum of **1r** ( $\text{CDCl}_3$ , 400 MHz)

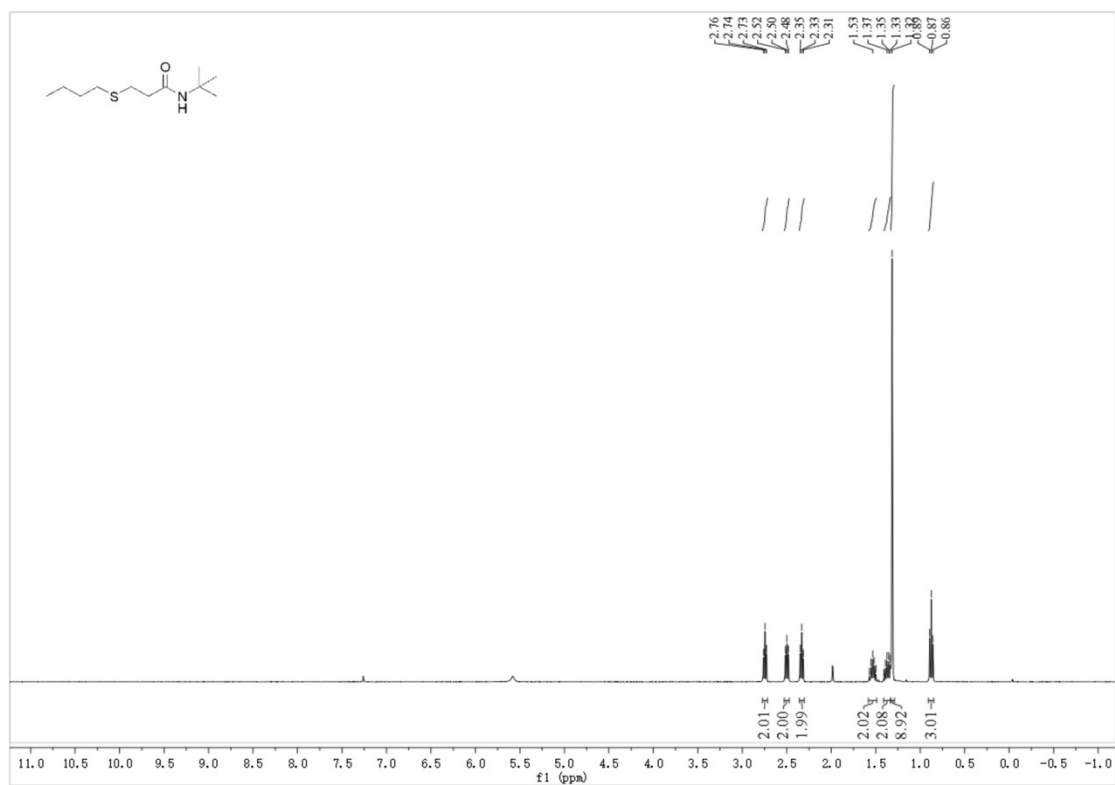

$^{13}\text{C}$  NMR spectrum of **1r** ( $\text{CDCl}_3$ , 101 MHz)

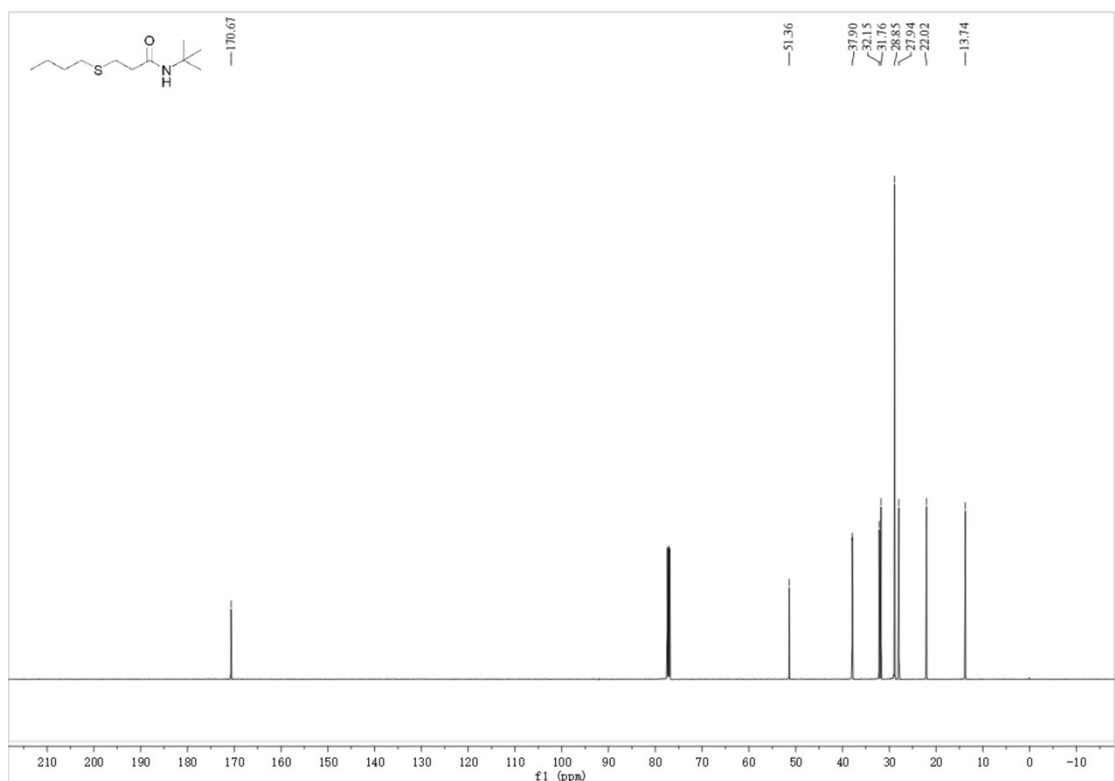

$^1\text{H}$  NMR spectrum of **1s** ( $\text{CDCl}_3$ , 400 MHz)

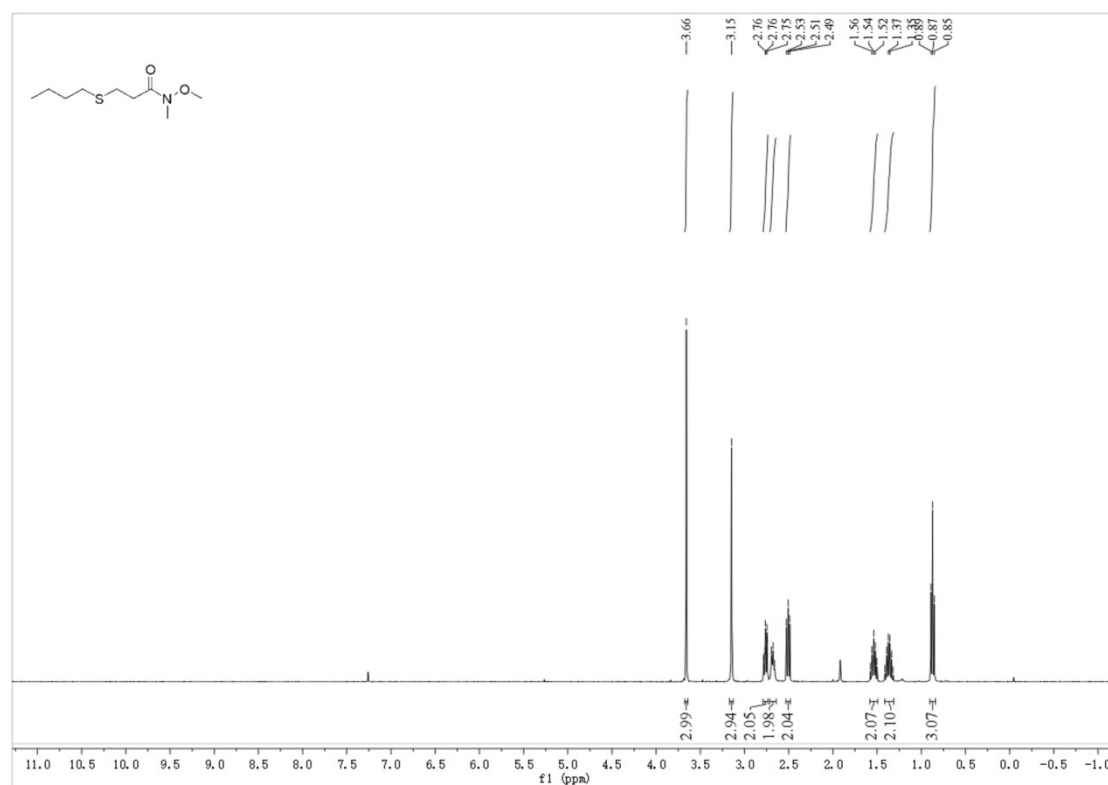

$^{13}\text{C}$  NMR spectrum of **1s** ( $\text{CDCl}_3$ , 101 MHz)

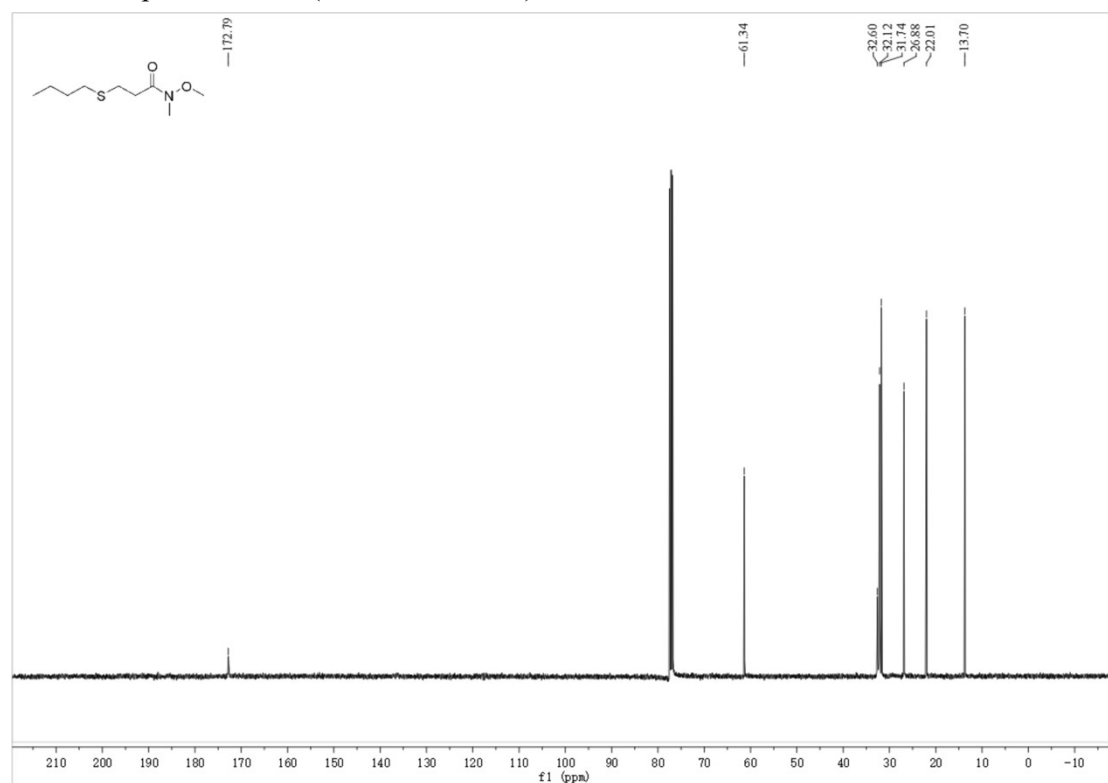

$^1\text{H}$  NMR spectrum of **1t** ( $\text{CDCl}_3$ , 400 MHz)

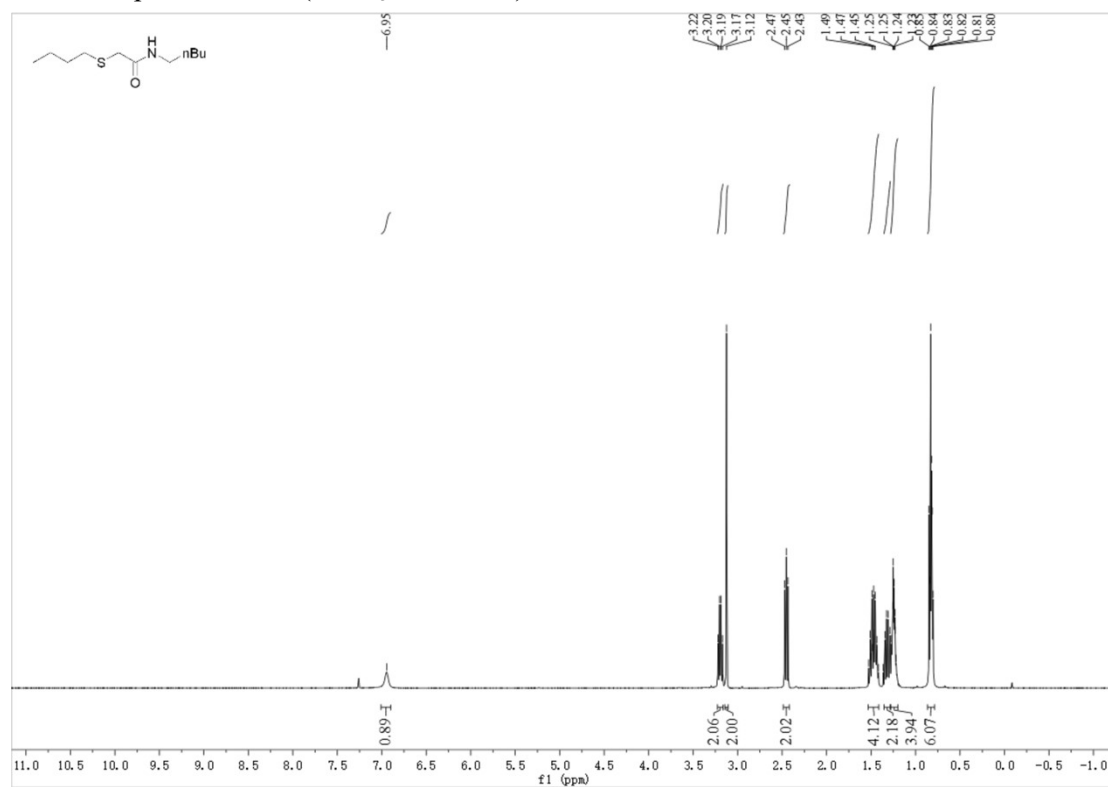

$^{13}\text{C}$  NMR spectrum of **1t** ( $\text{CDCl}_3$ , 101 MHz)

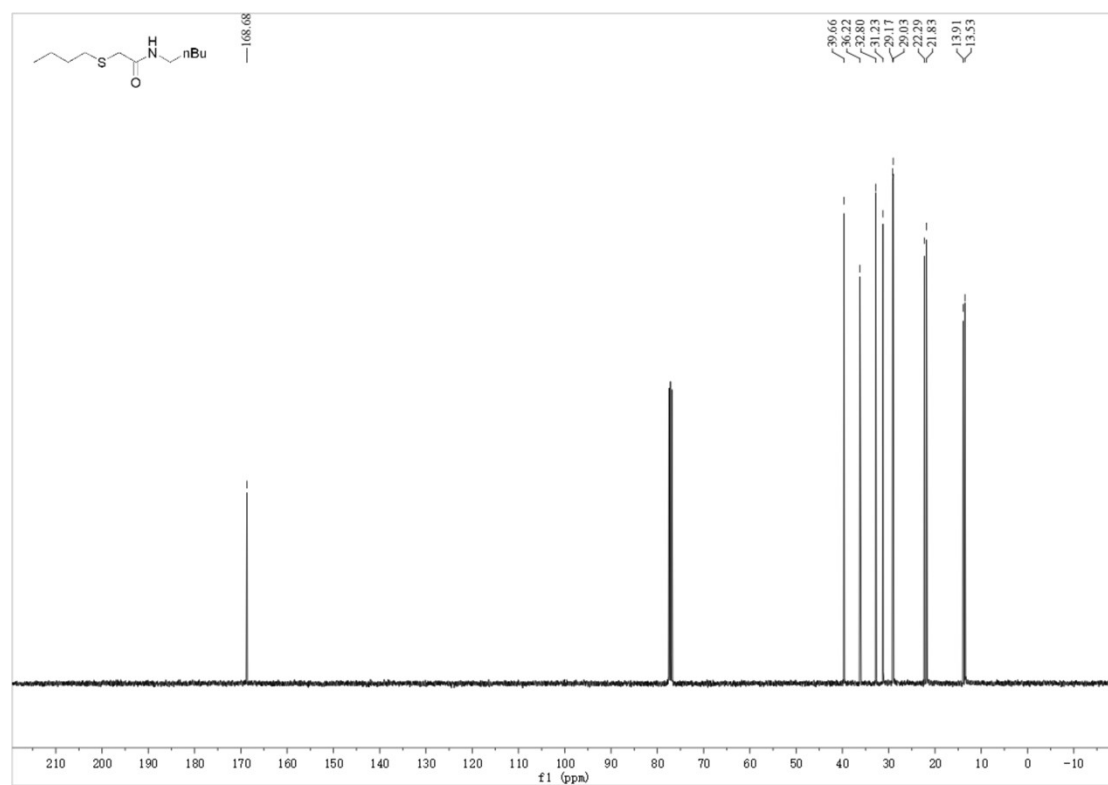

$^1\text{H}$  NMR spectrum of **1u** ( $\text{CDCl}_3$ , 400 MHz)

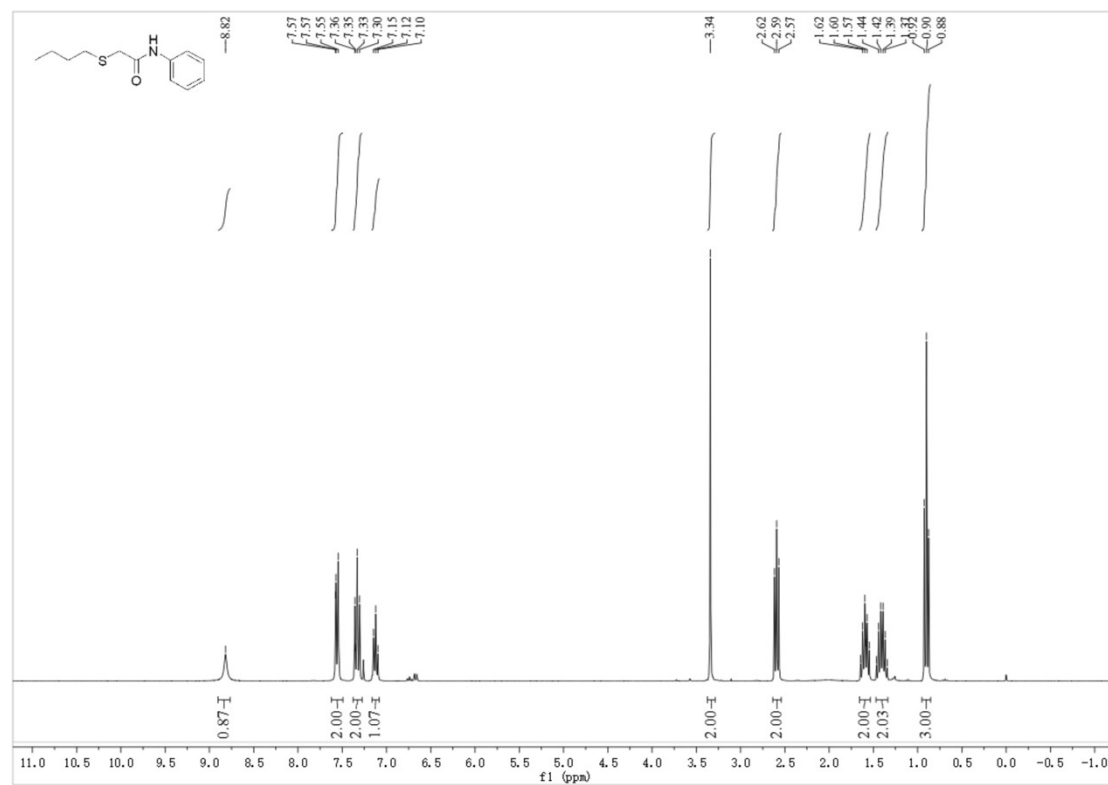

$^{13}\text{C}$  NMR spectrum of **1u** ( $\text{CDCl}_3$ , 101 MHz)

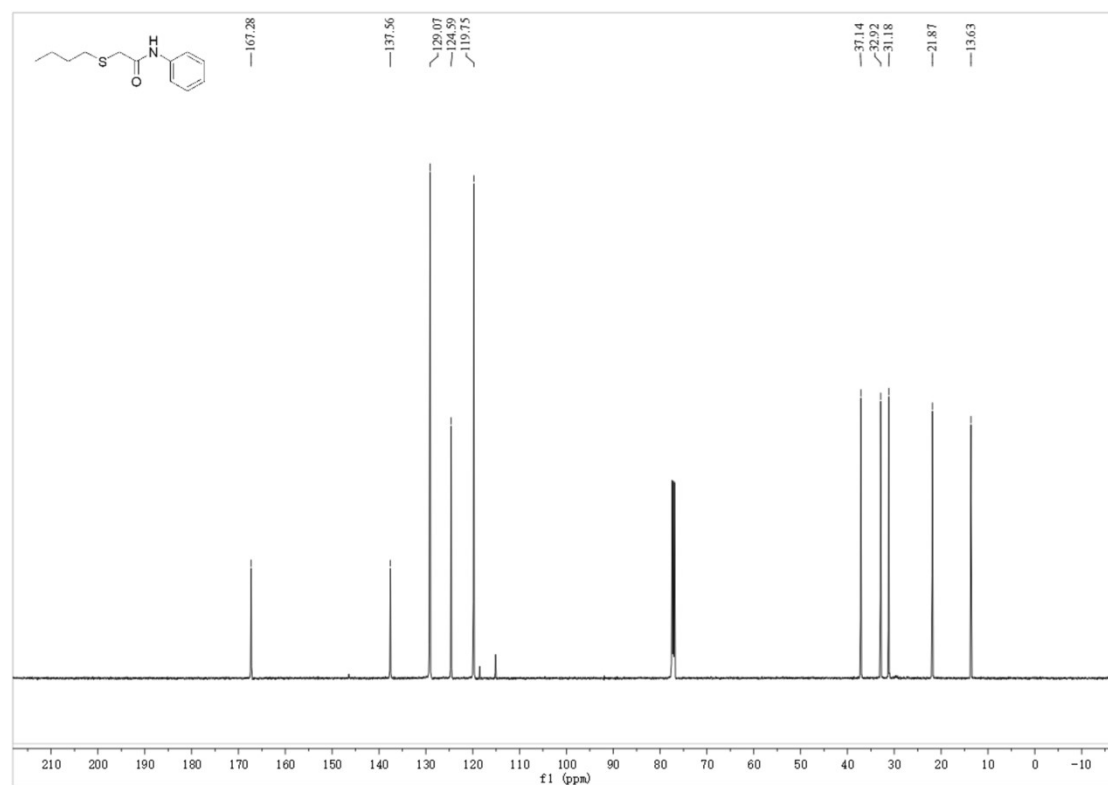

$^1\text{H}$  NMR spectrum of **1v** ( $\text{CDCl}_3$ , 400 MHz)

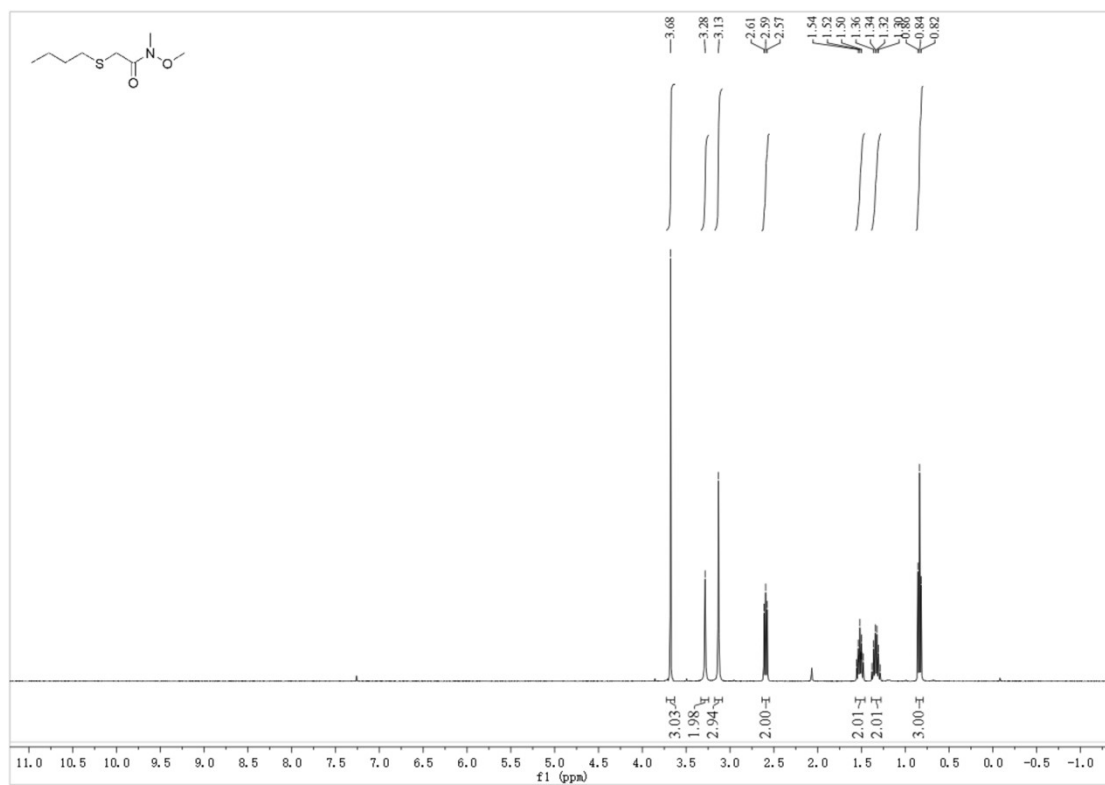

$^{13}\text{C}$  NMR spectrum of **1v** ( $\text{CDCl}_3$ , 101 MHz)

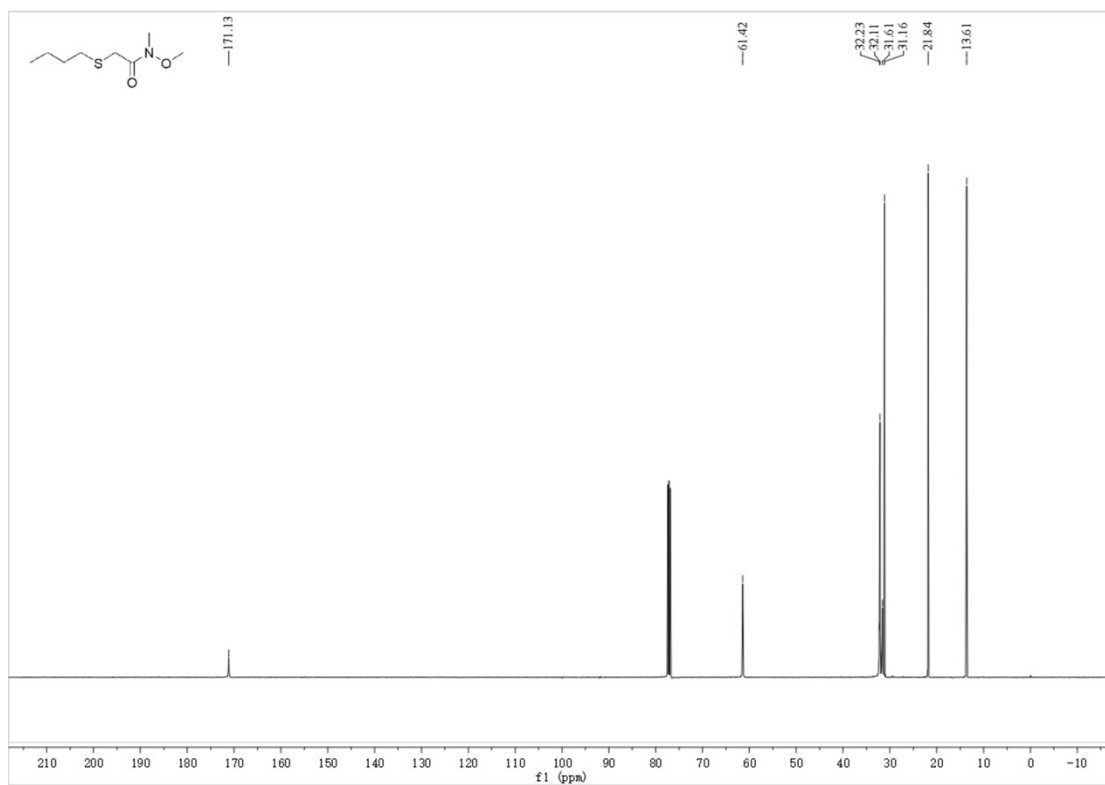

$^1\text{H}$  NMR spectrum of **1w** ( $\text{CDCl}_3$ , 400 MHz)

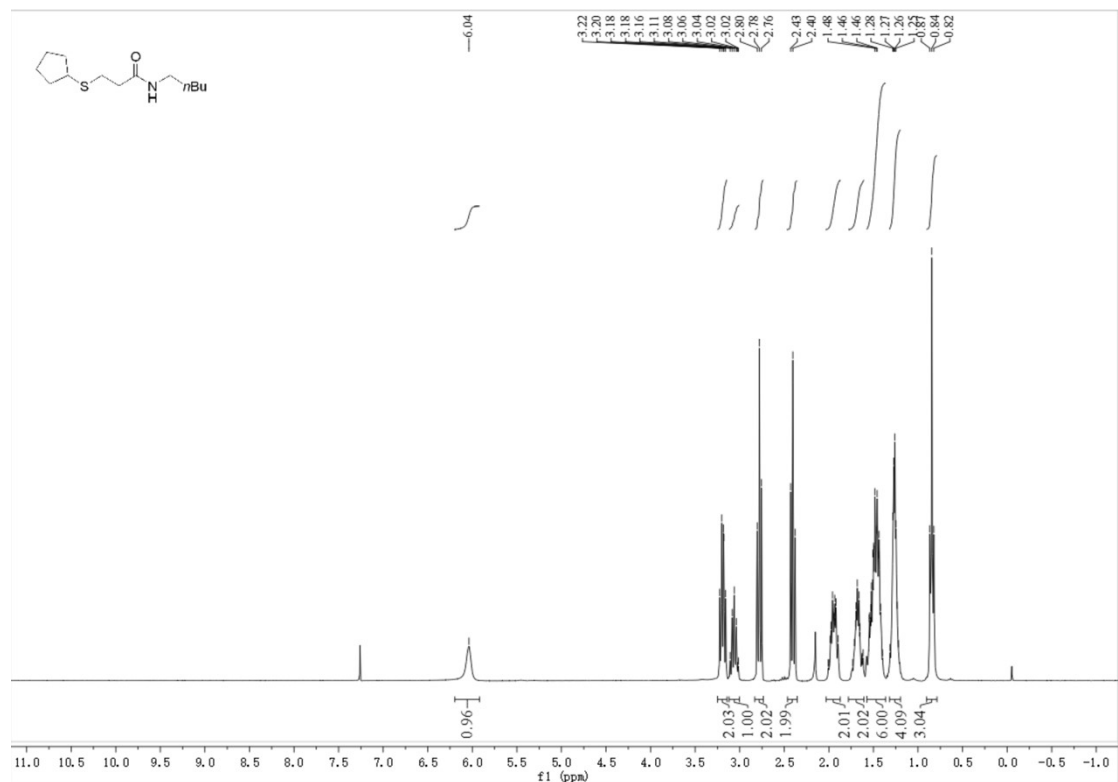

$^{13}\text{C}$  NMR spectrum of **1w** ( $\text{CDCl}_3$ , 101 MHz)

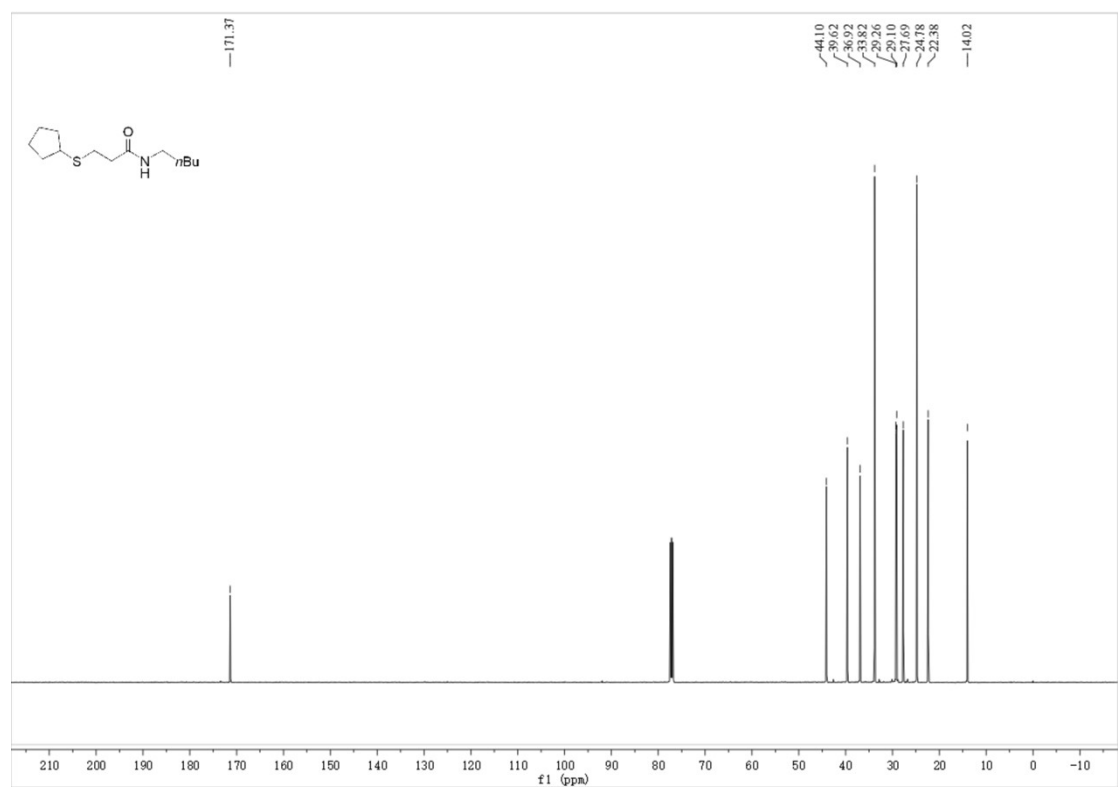

$^1\text{H}$  NMR spectrum of **1x** ( $\text{CDCl}_3$ , 400 MHz)

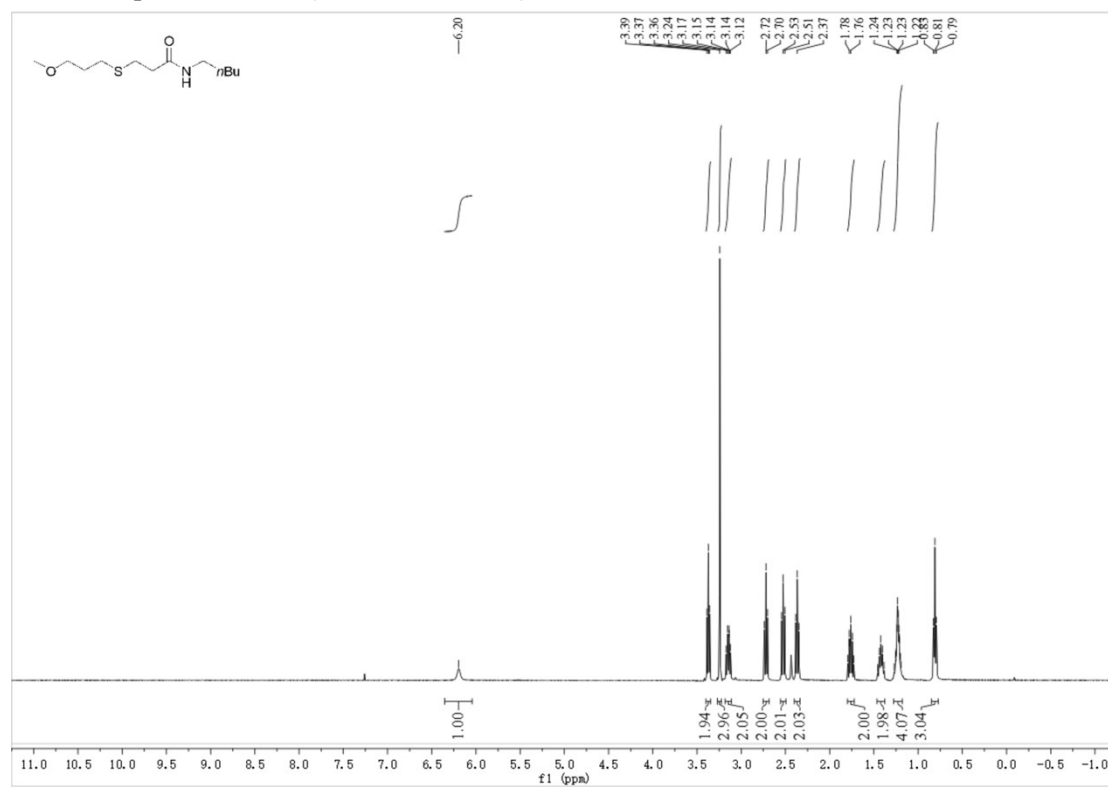

$^{13}\text{C}$  NMR spectrum of **1x** ( $\text{CDCl}_3$ , 101 MHz)

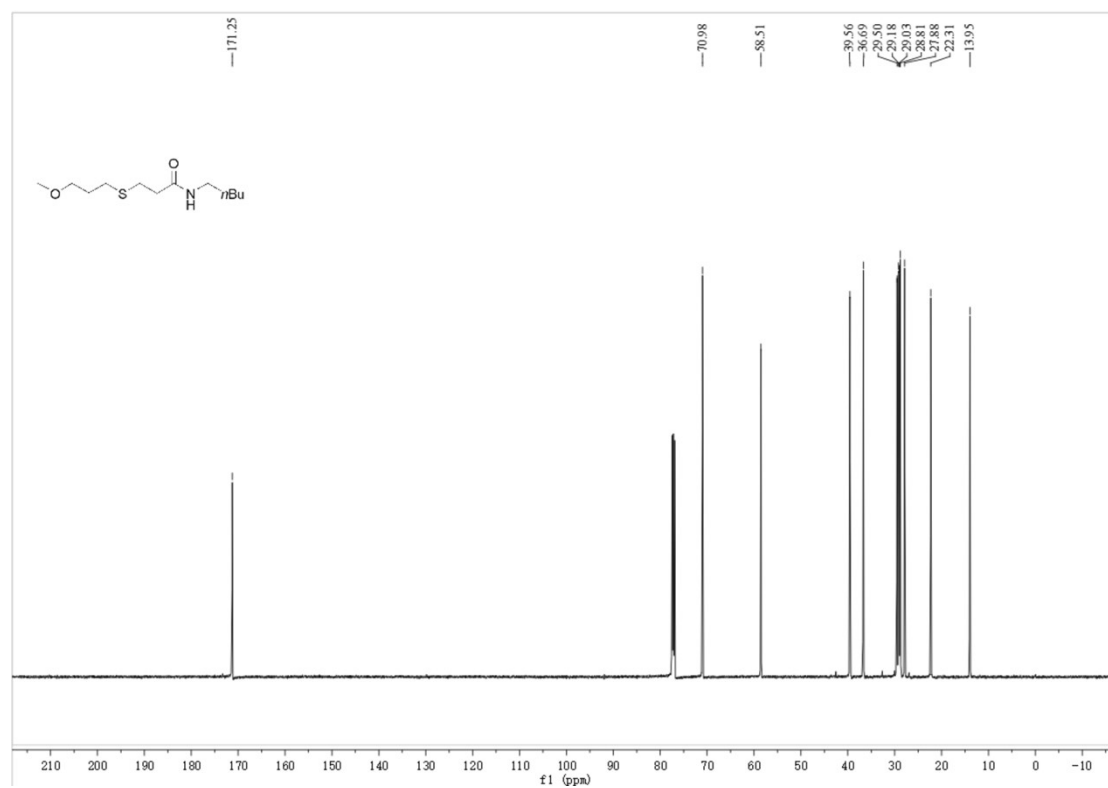

$^1\text{H}$  NMR spectrum of **1y** ( $\text{CDCl}_3$ , 400 MHz)

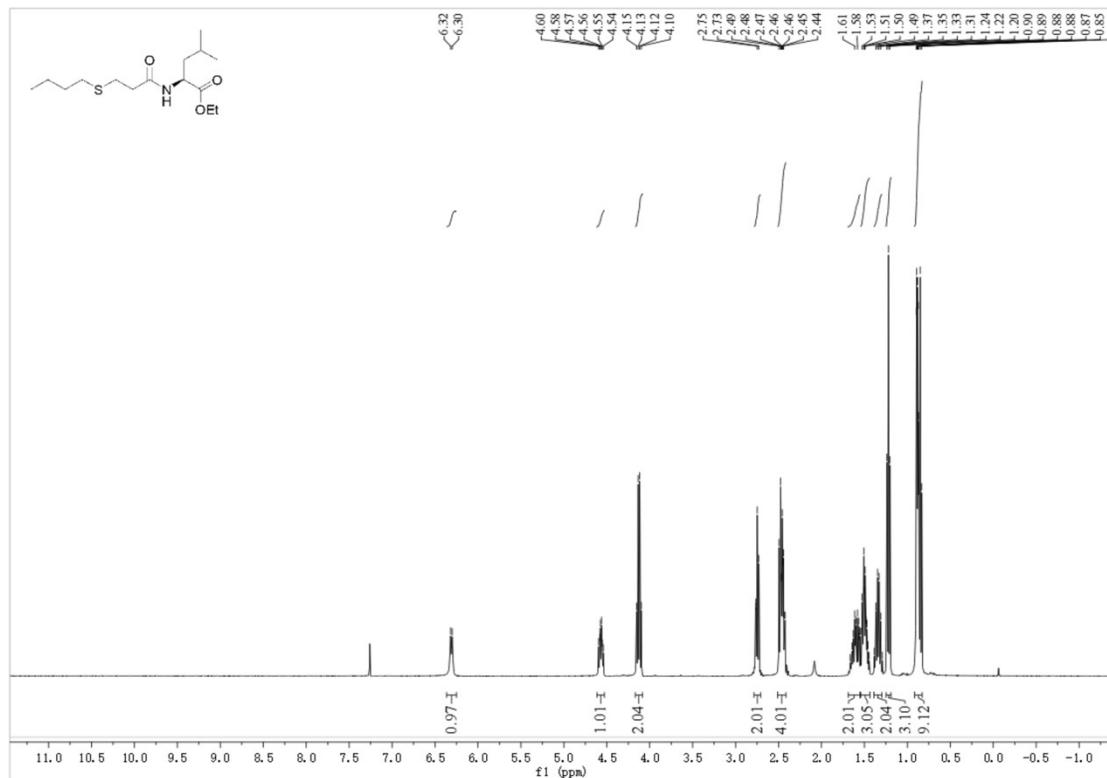

$^{13}\text{C}$  NMR spectrum of **1y** ( $\text{CDCl}_3$ , 101 MHz)

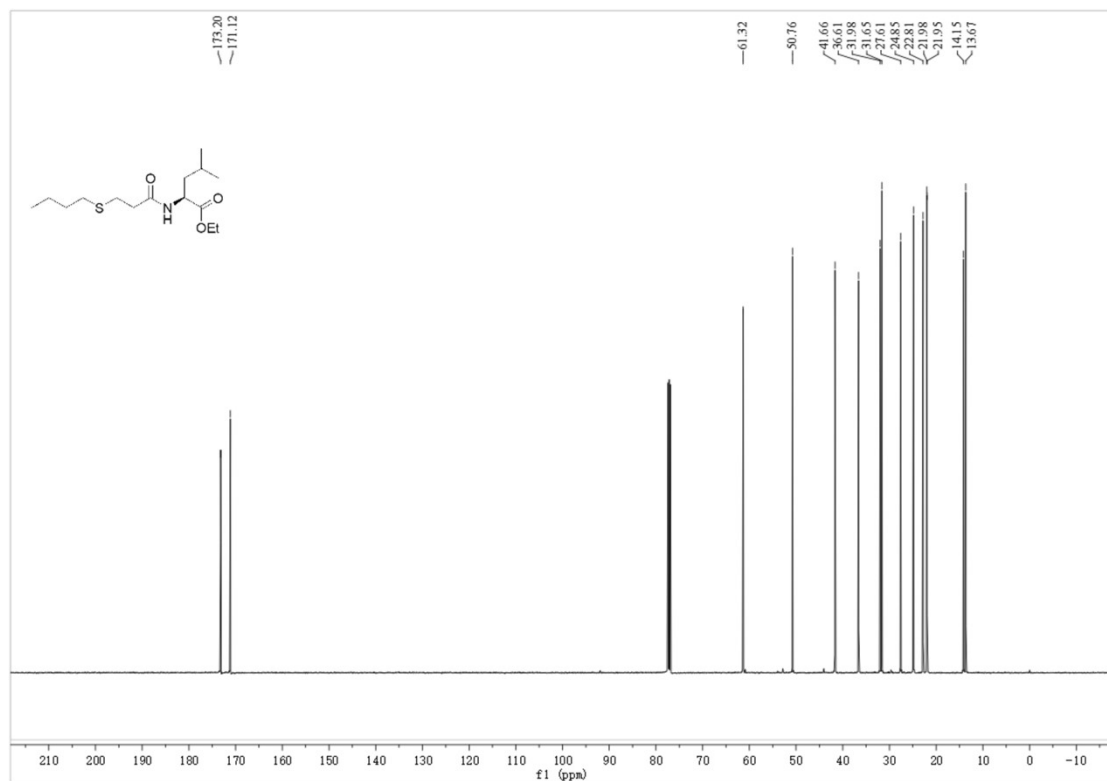

$^1\text{H}$  NMR spectrum of **1z** ( $\text{CDCl}_3$ , 400 MHz)

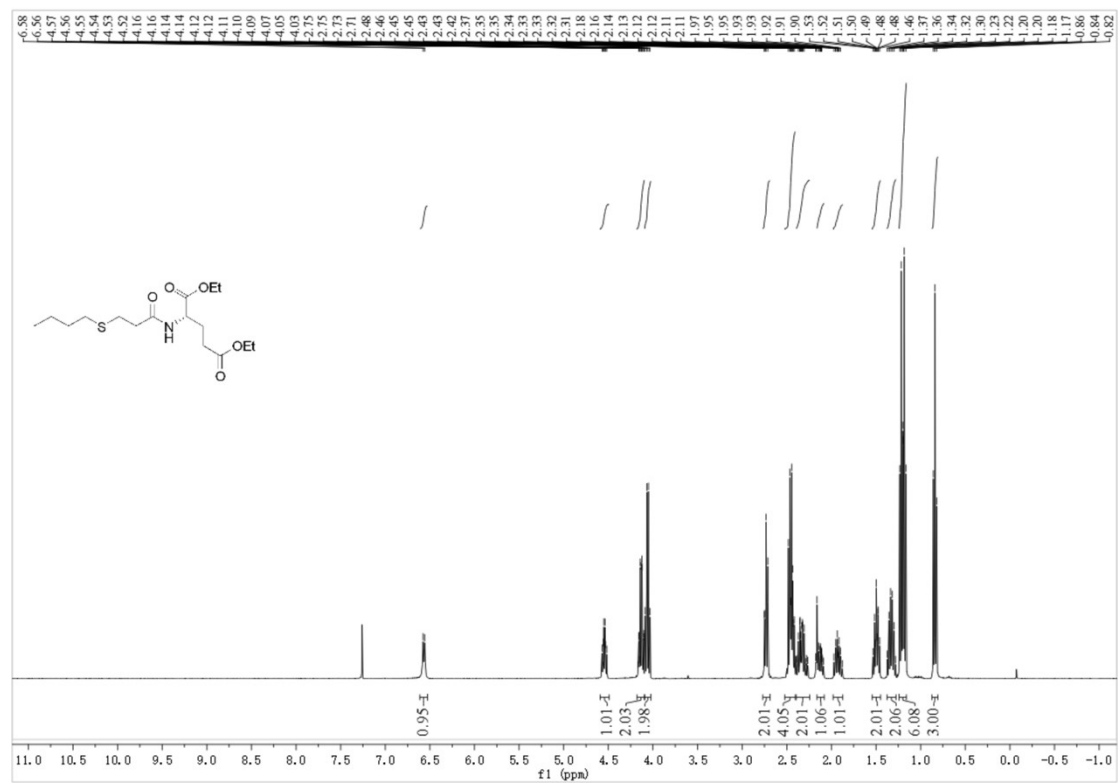

$^{13}\text{C}$  NMR spectrum of **1z** ( $\text{CDCl}_3$ , 101 MHz)

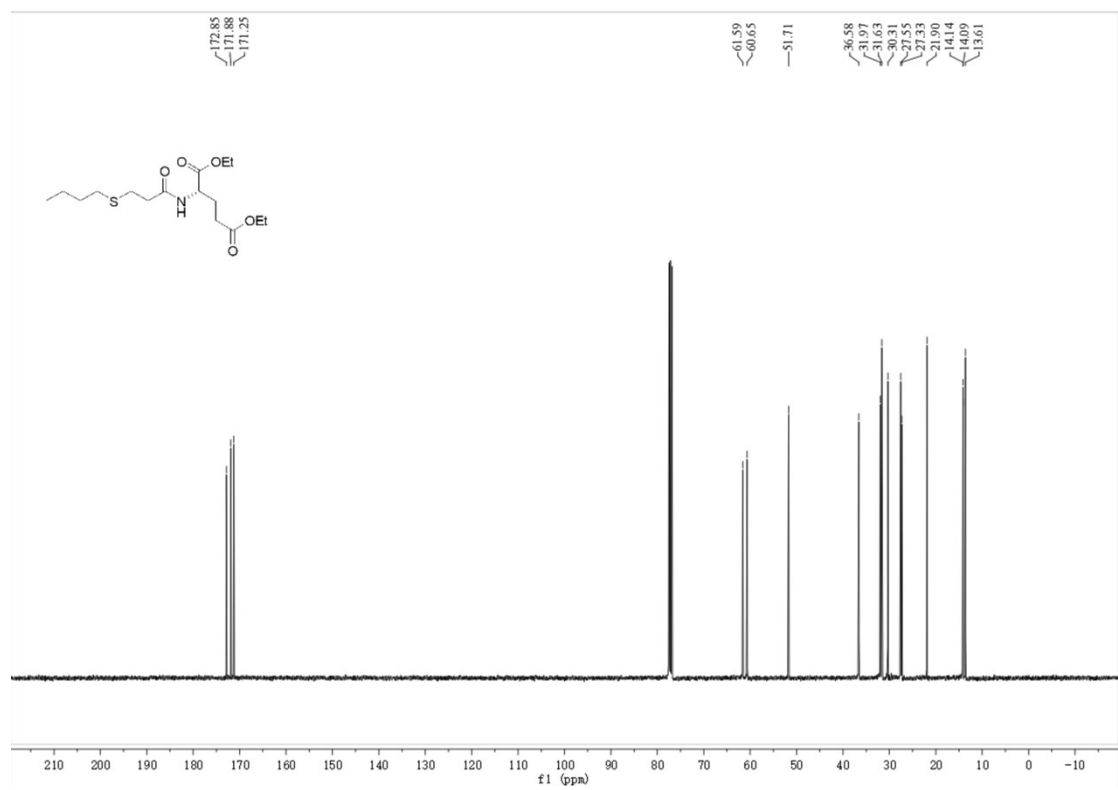

$^1\text{H}$  NMR spectrum of **1aa** ( $\text{CDCl}_3$ , 400 MHz)

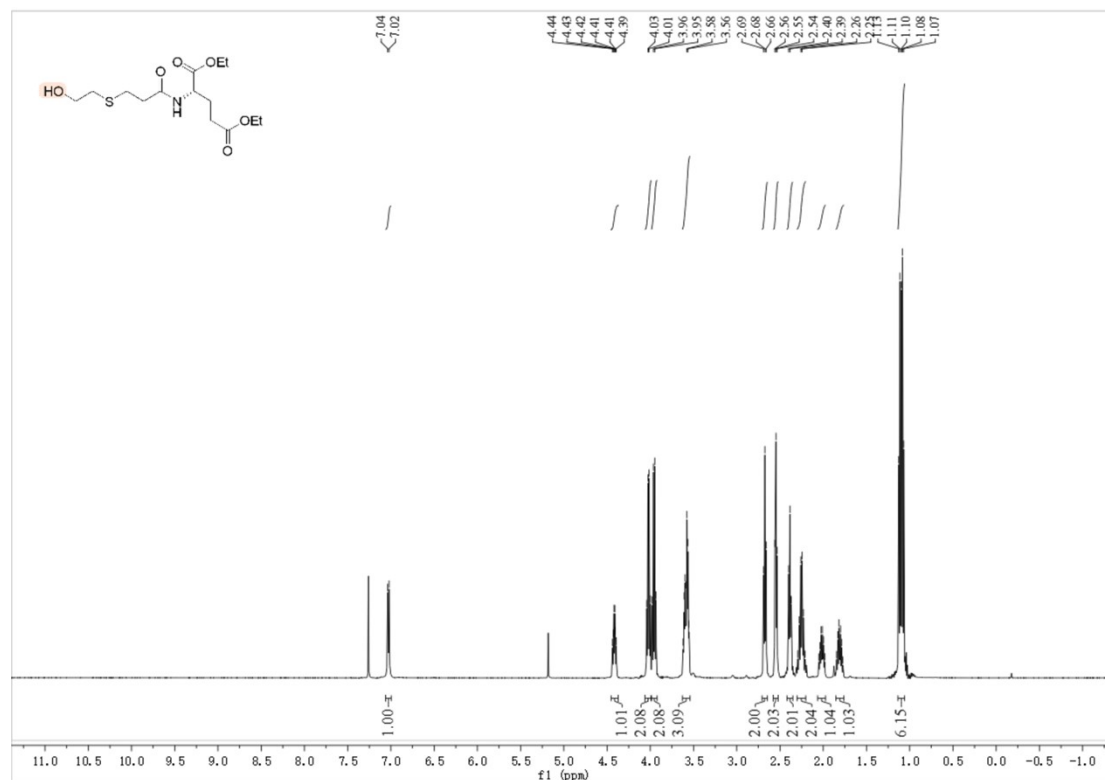

$^{13}\text{C}$  NMR spectrum of **1aa** ( $\text{CDCl}_3$ , 101 MHz)

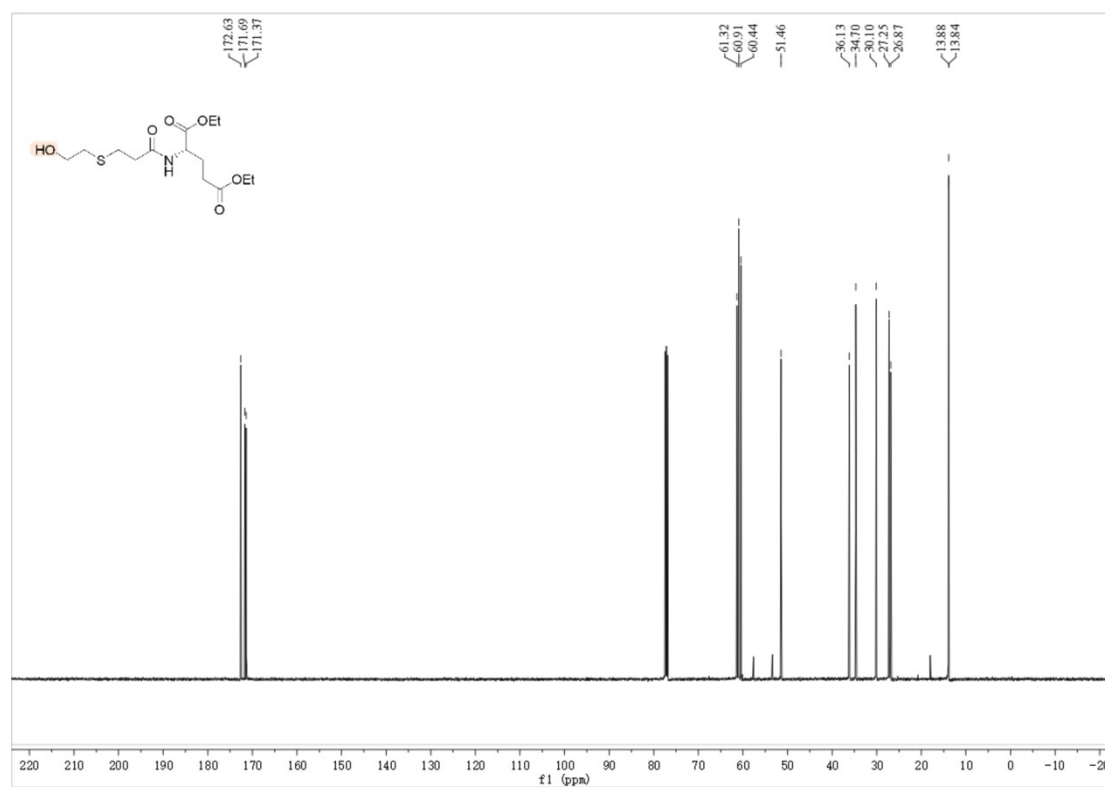

$^1\text{H}$  NMR spectrum of **1ab** ( $\text{CDCl}_3$ , 400 MHz)

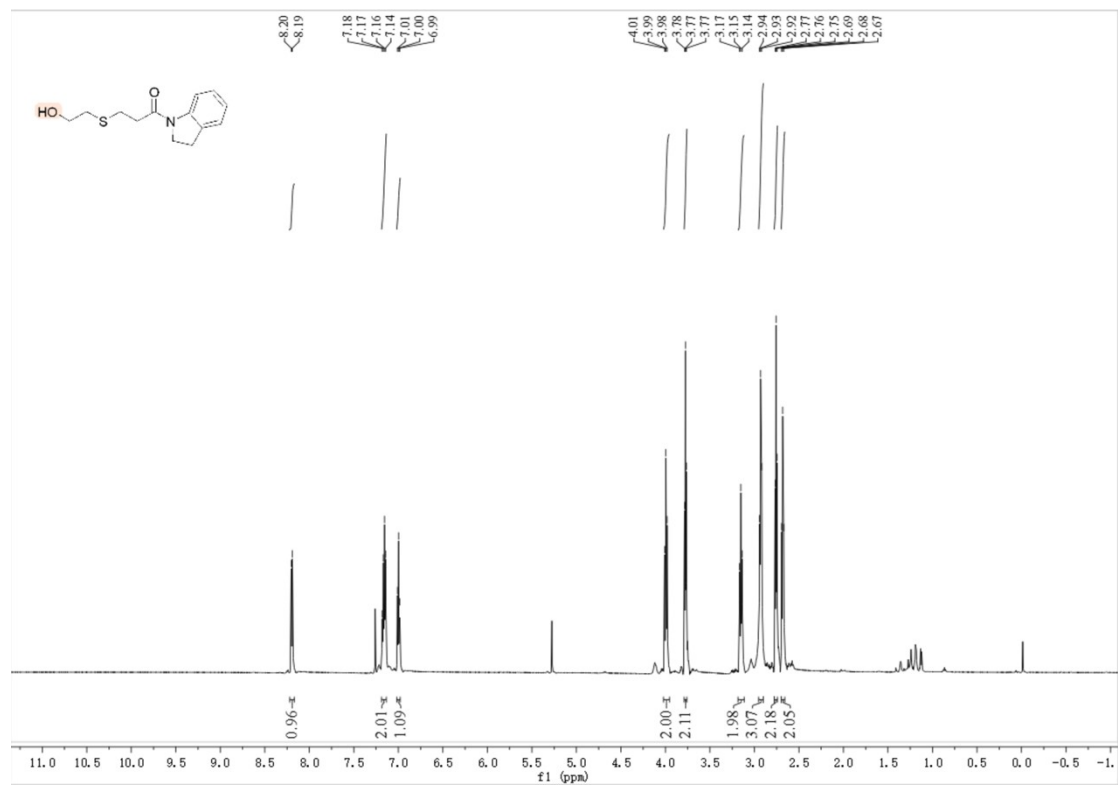

$^{13}\text{C}$  NMR spectrum of **1ab** ( $\text{CDCl}_3$ , 101 MHz)

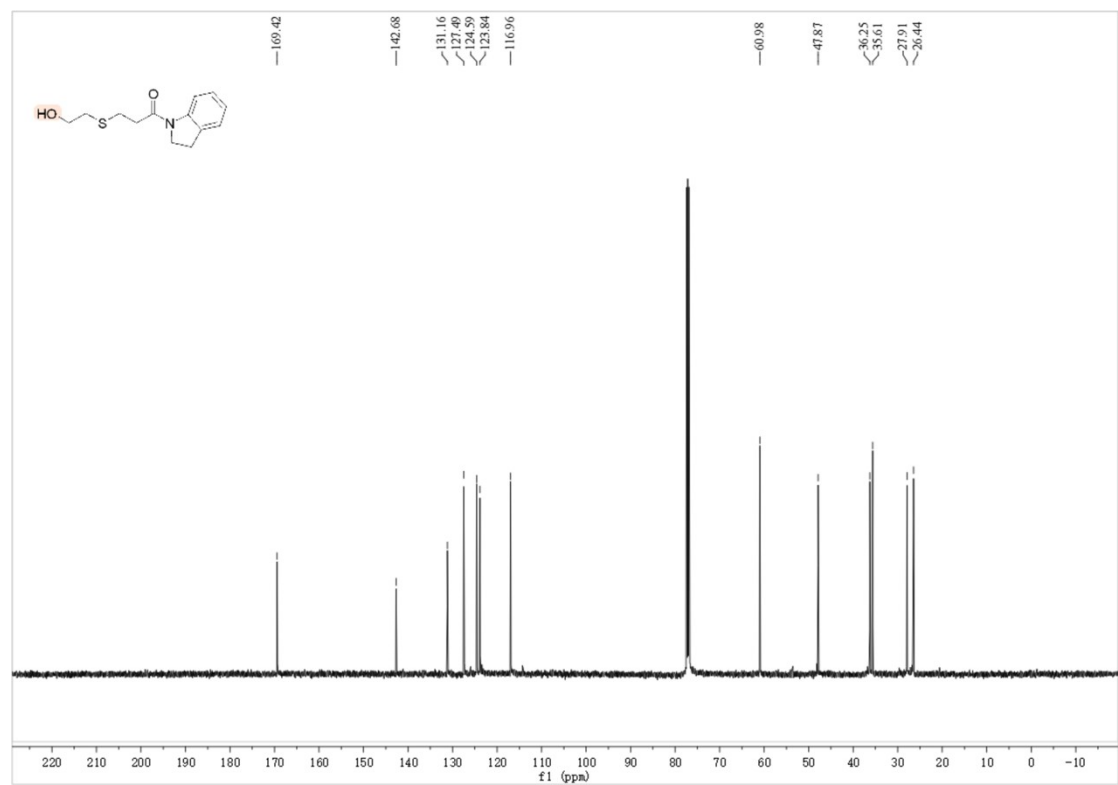

<sup>1</sup>H NMR spectrum of **1ac** (CDCl<sub>3</sub>, 400 MHz)

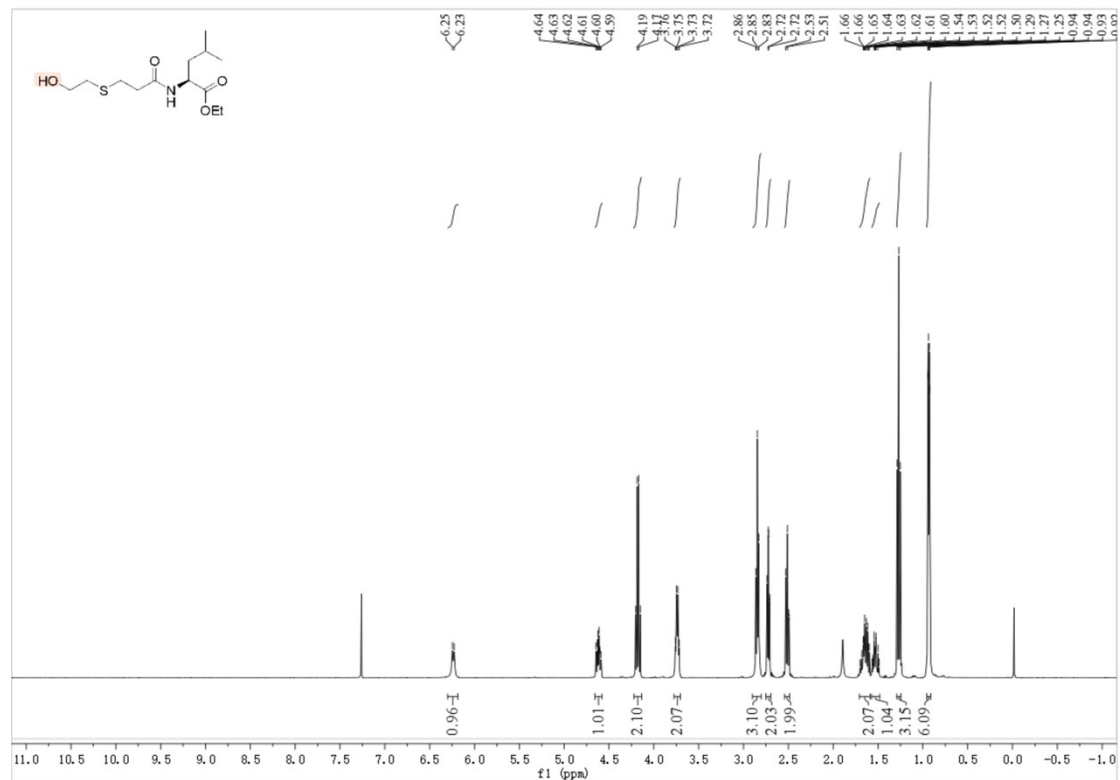

<sup>13</sup>C NMR spectrum of **1ac** (CDCl<sub>3</sub>, 101 MHz)

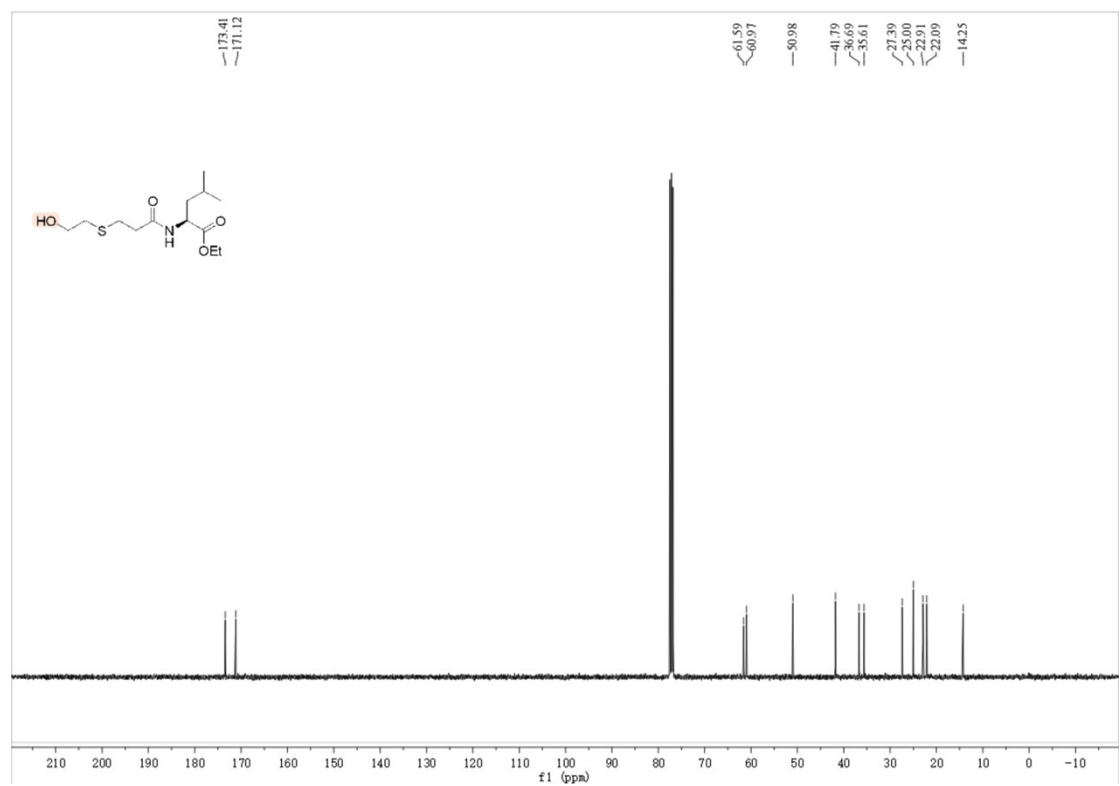

$^1\text{H}$  NMR spectrum of **1ad** ( $\text{CDCl}_3$ , 400 MHz)

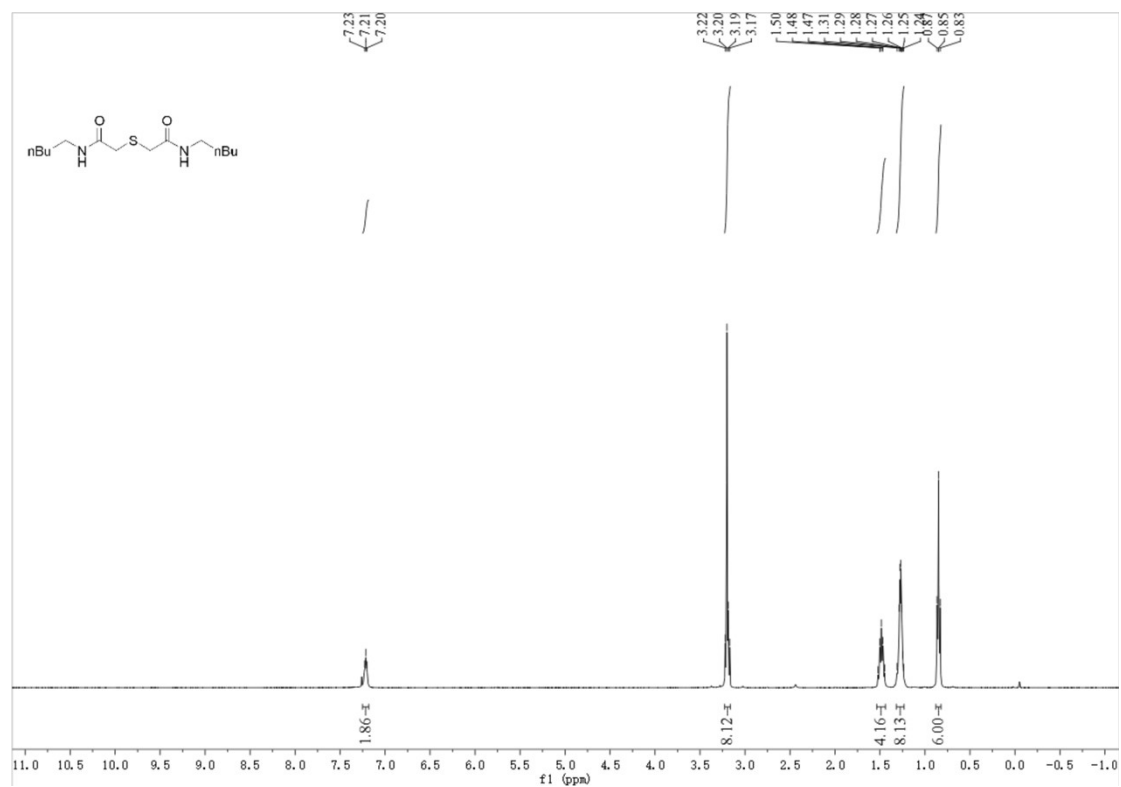

$^{13}\text{C}$  NMR spectrum of **1ad** ( $\text{CDCl}_3$ , 101 MHz)

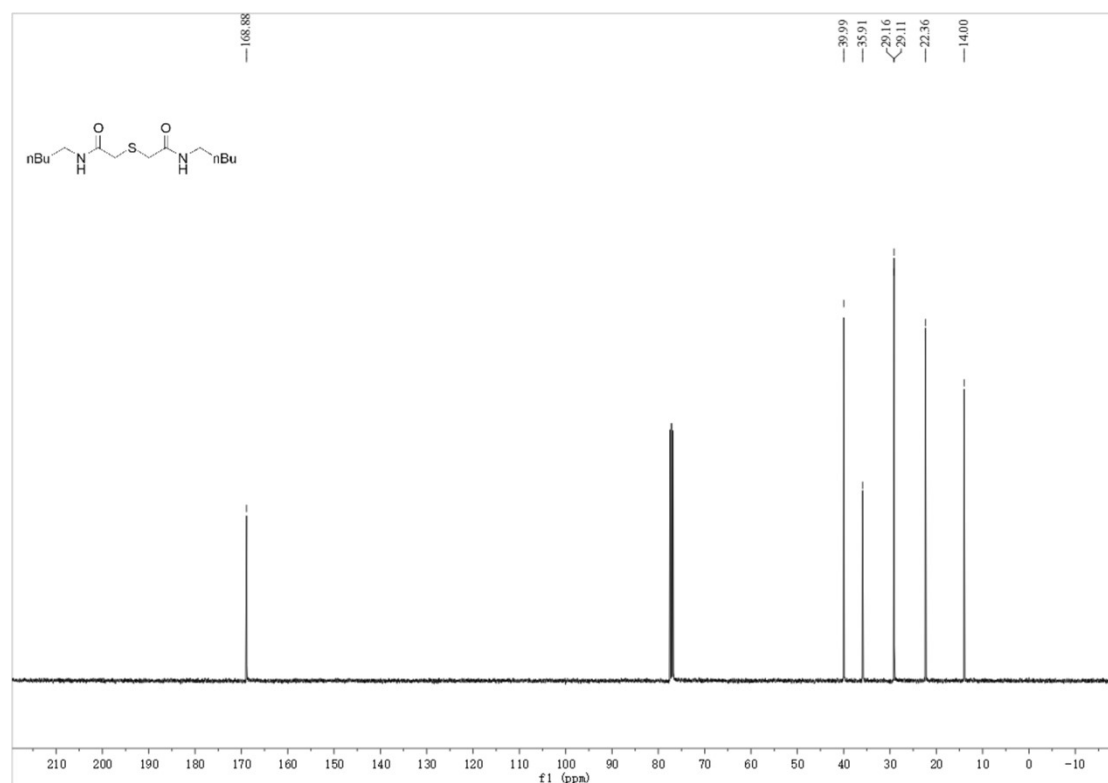



$^1\text{H}$  NMR spectrum of **1af** ( $\text{CDCl}_3$ , 400 MHz)

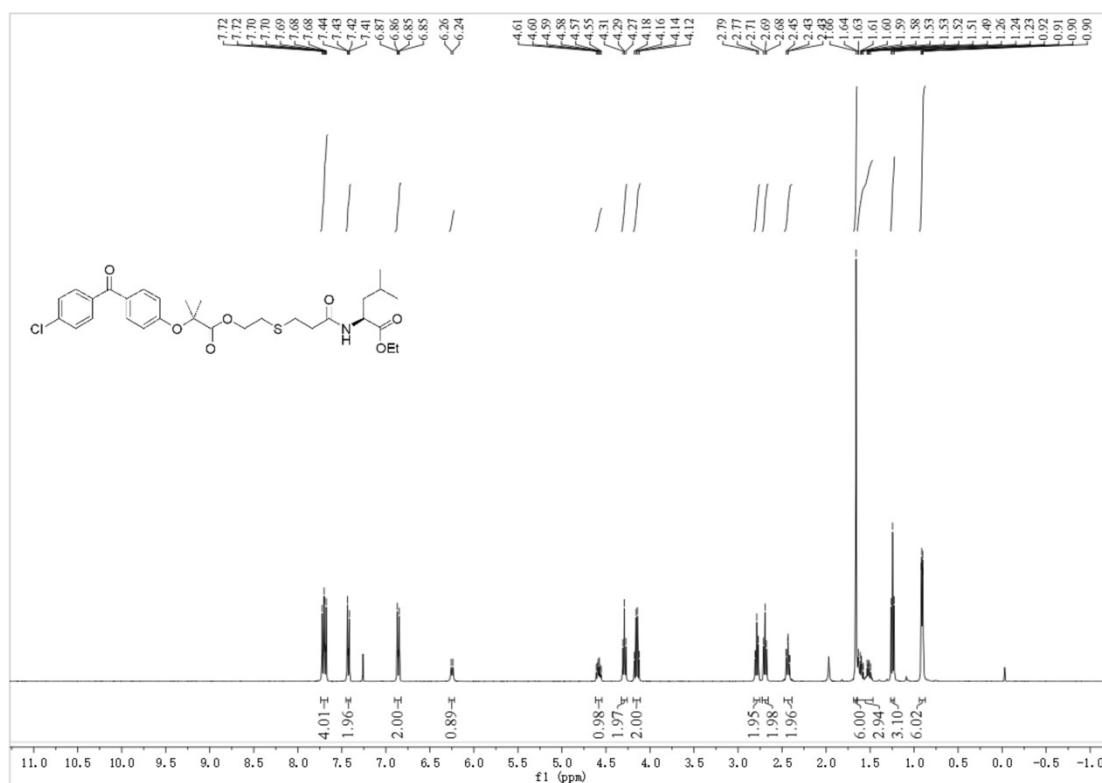

$^{13}\text{C}$  NMR spectrum of **1af** ( $\text{CDCl}_3$ , 101 MHz)

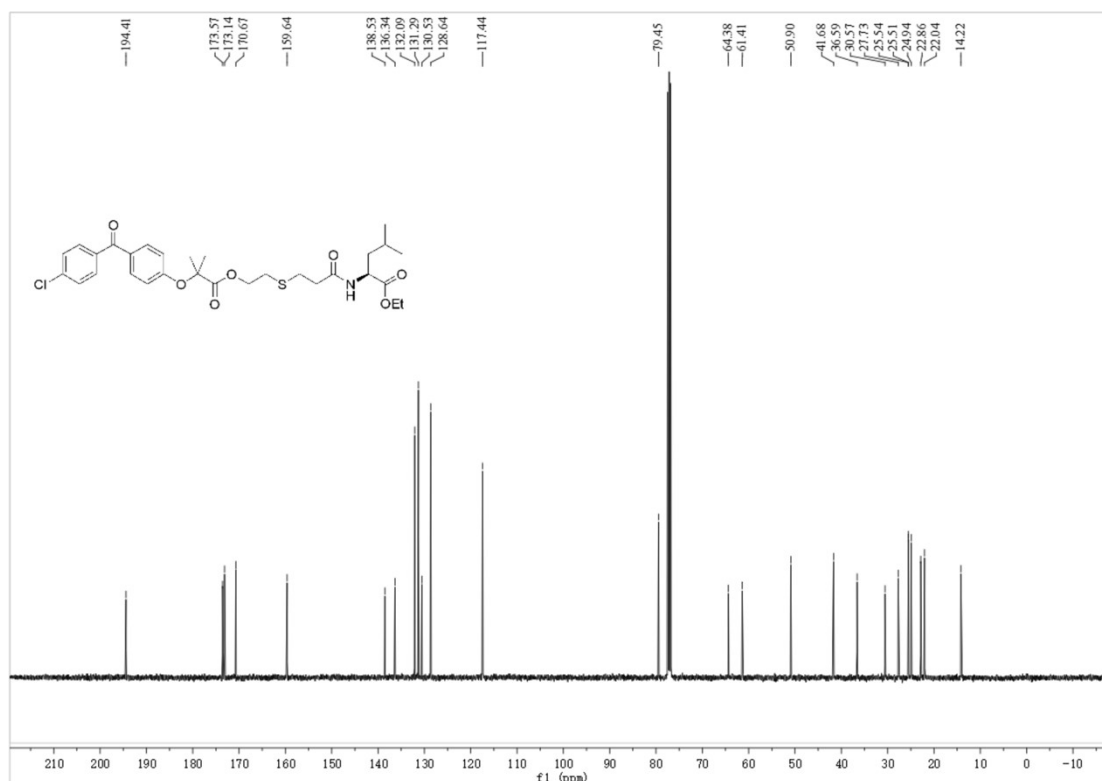

$^1\text{H}$  NMR spectrum of **1ag** ( $\text{CDCl}_3$ , 400 MHz)

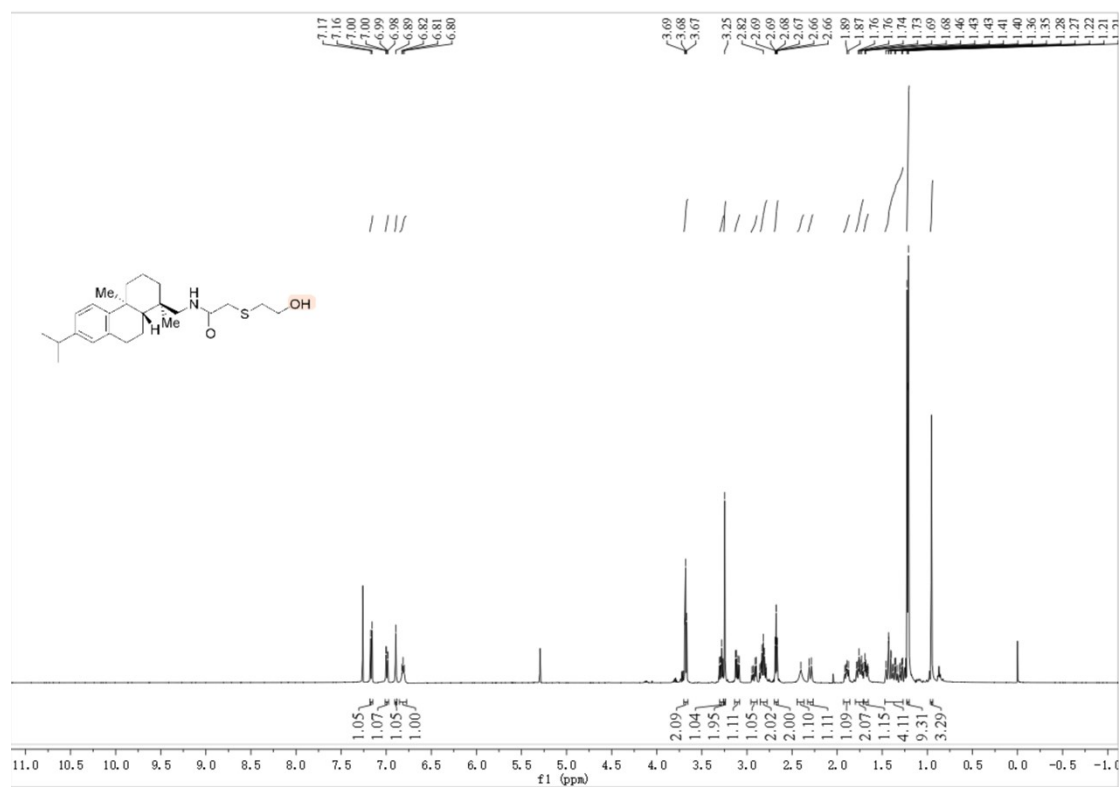

$^{13}\text{C}$  NMR spectrum of **1ag** ( $\text{CDCl}_3$ , 101 MHz)

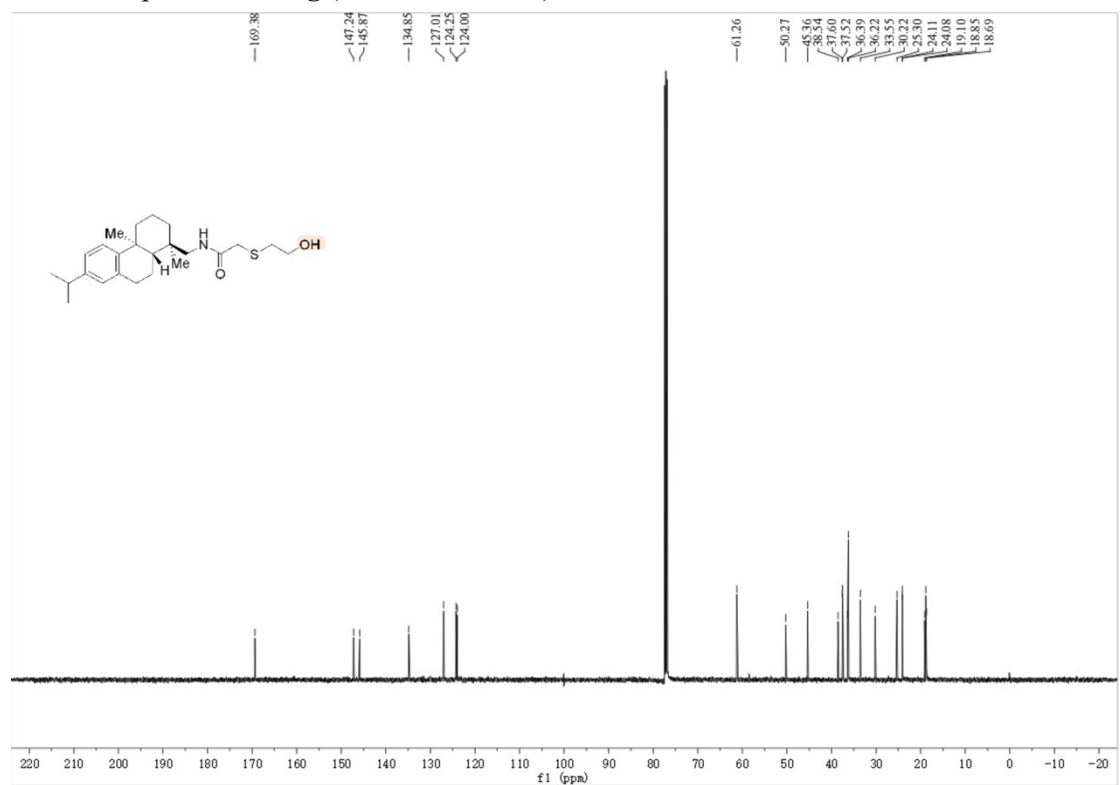

$^1\text{H}$  NMR spectrum of **1ah** ( $\text{CDCl}_3$ , 400 MHz)

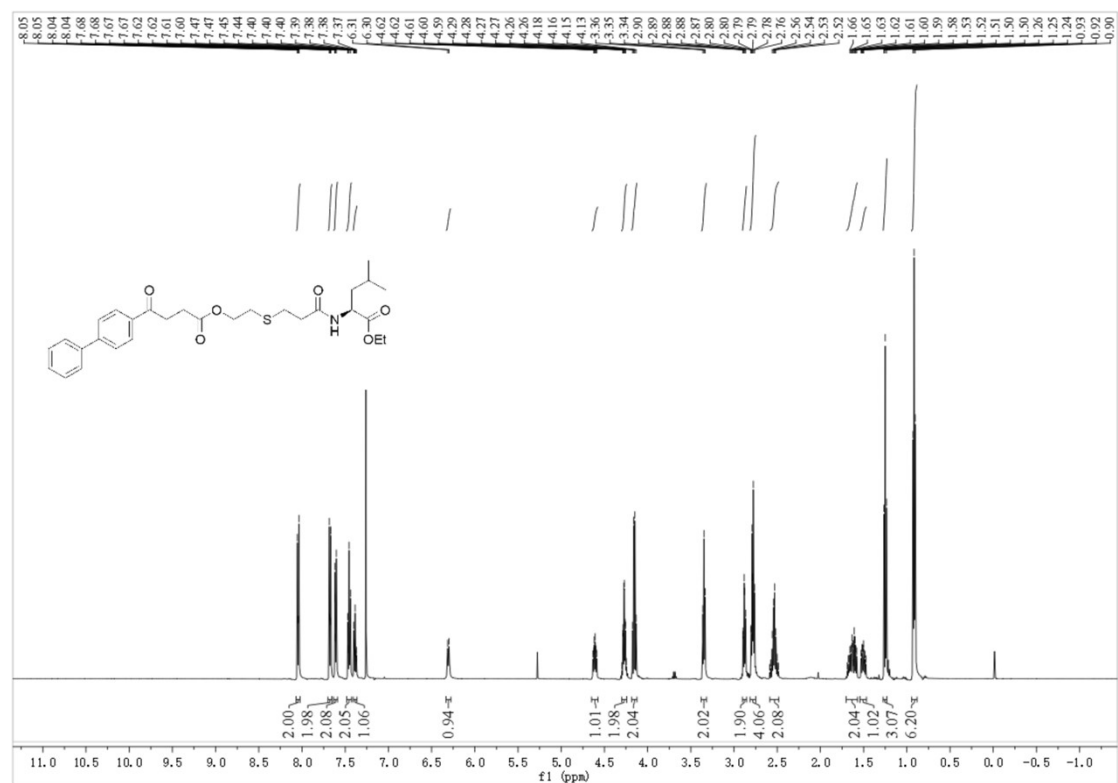

$^{13}\text{C}$  NMR spectrum of **1ah** ( $\text{CDCl}_3$ , 101 MHz)

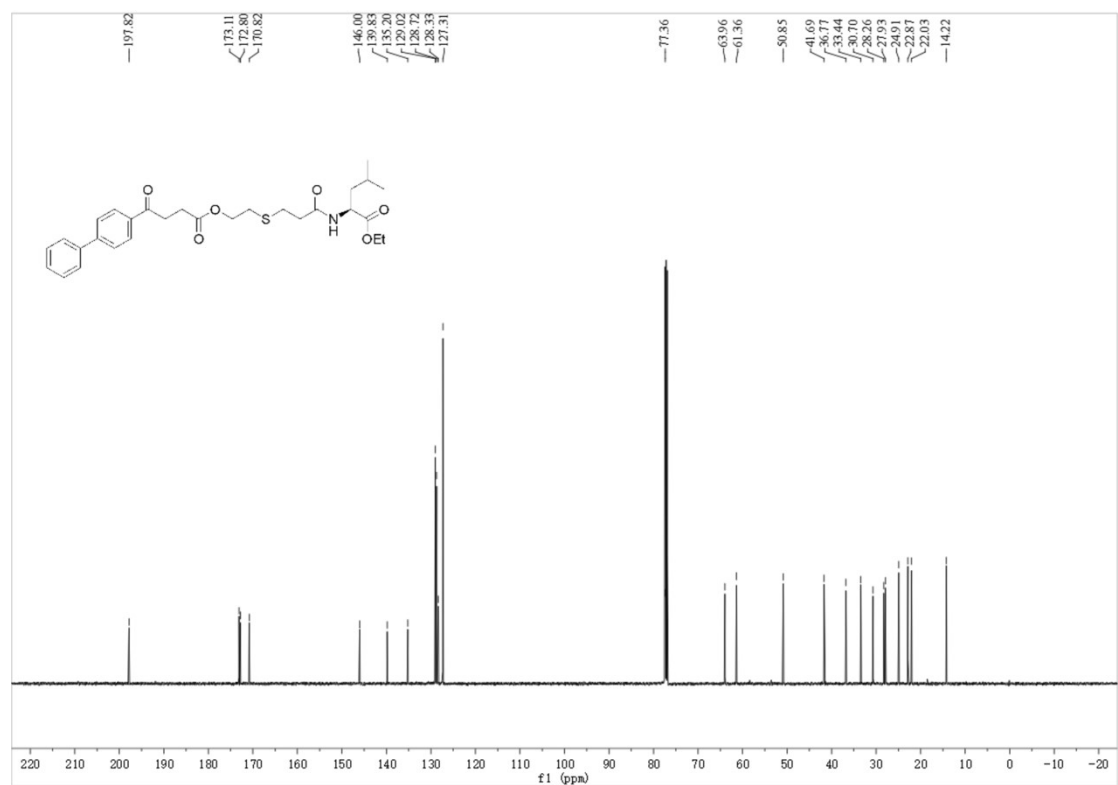

$^1\text{H}$  NMR spectrum of **2ai** ( $\text{CDCl}_3$ , 400 MHz)

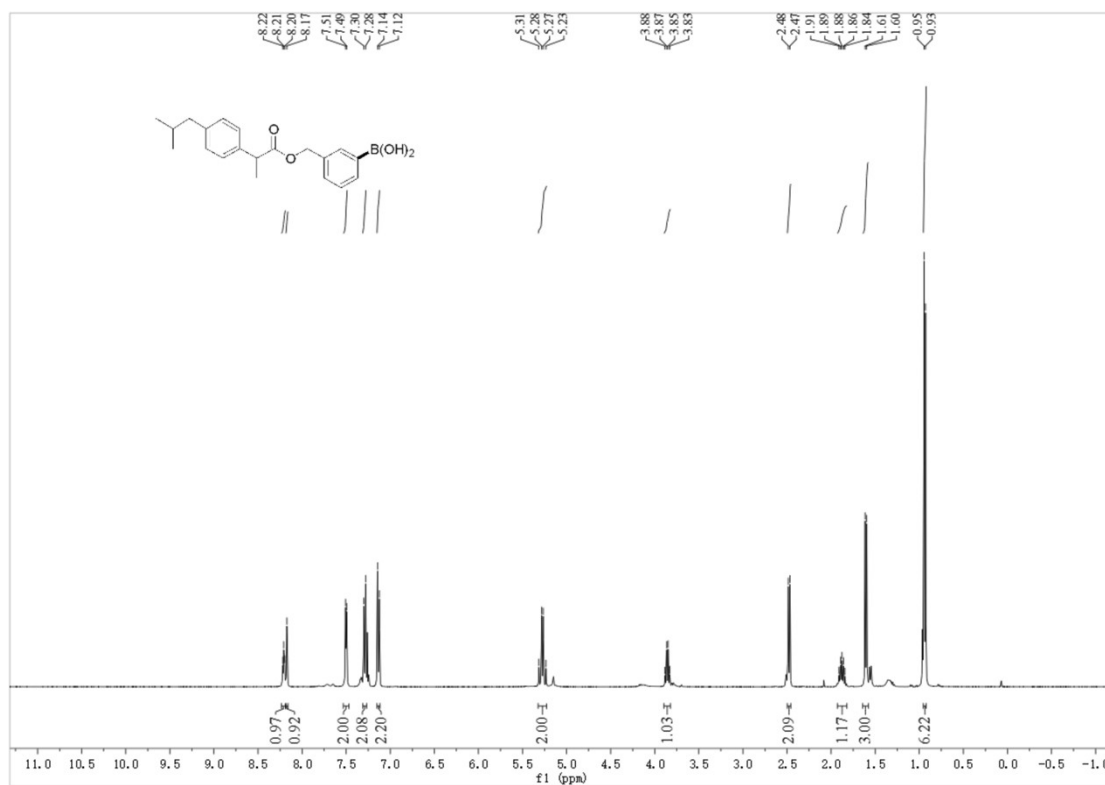

$^{13}\text{C}$  NMR spectrum of **2ai** ( $\text{CDCl}_3$ , 101 MHz)

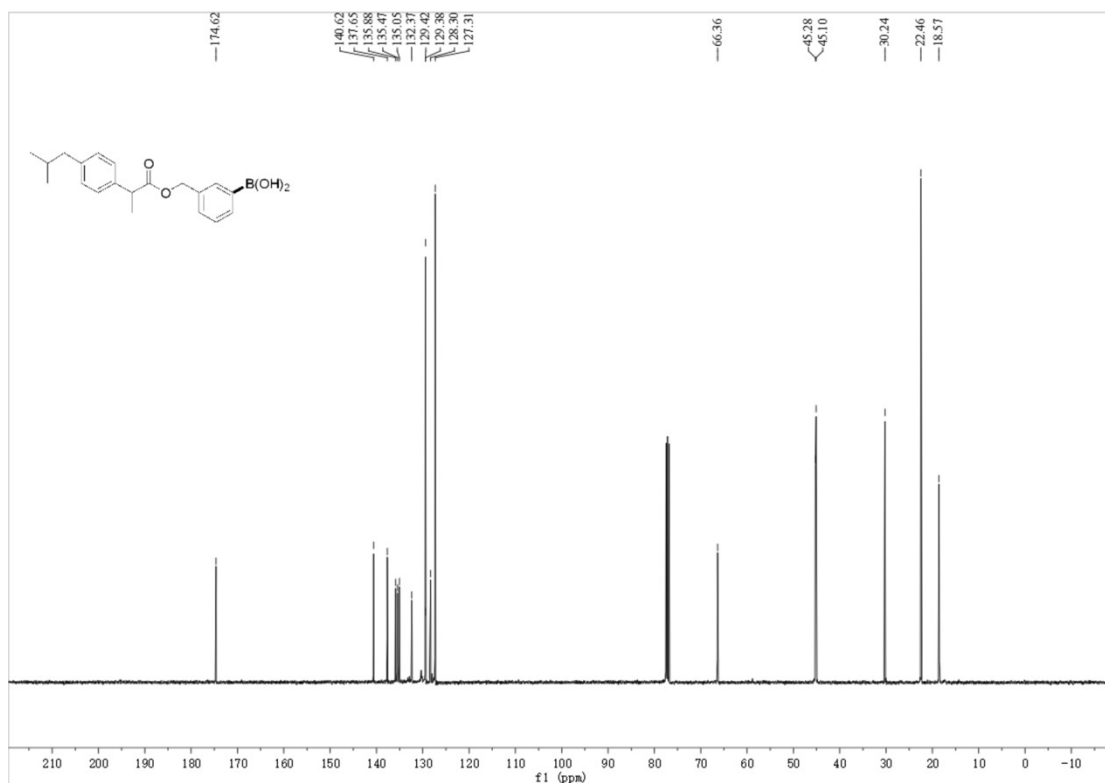

<sup>1</sup>H NMR spectrum of **1ak** (CDCl<sub>3</sub>, 500 MHz)

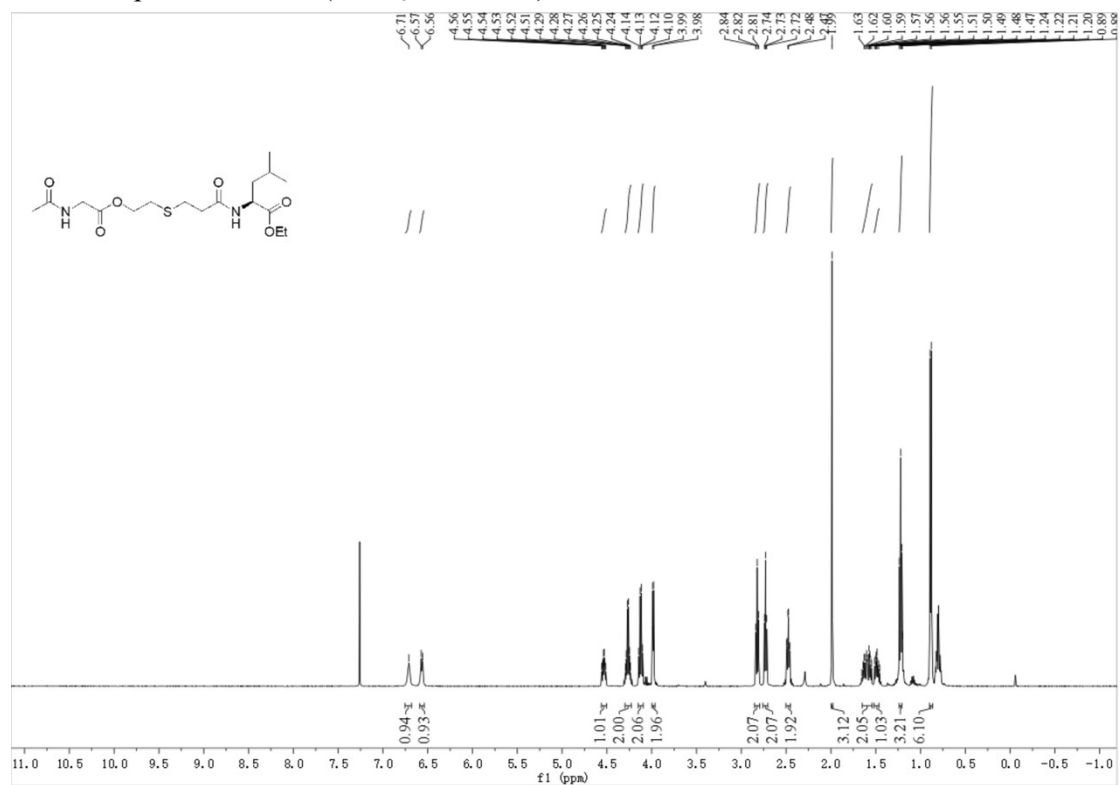

<sup>13</sup>C NMR spectrum of **1ak** (CDCl<sub>3</sub>, 126 MHz)

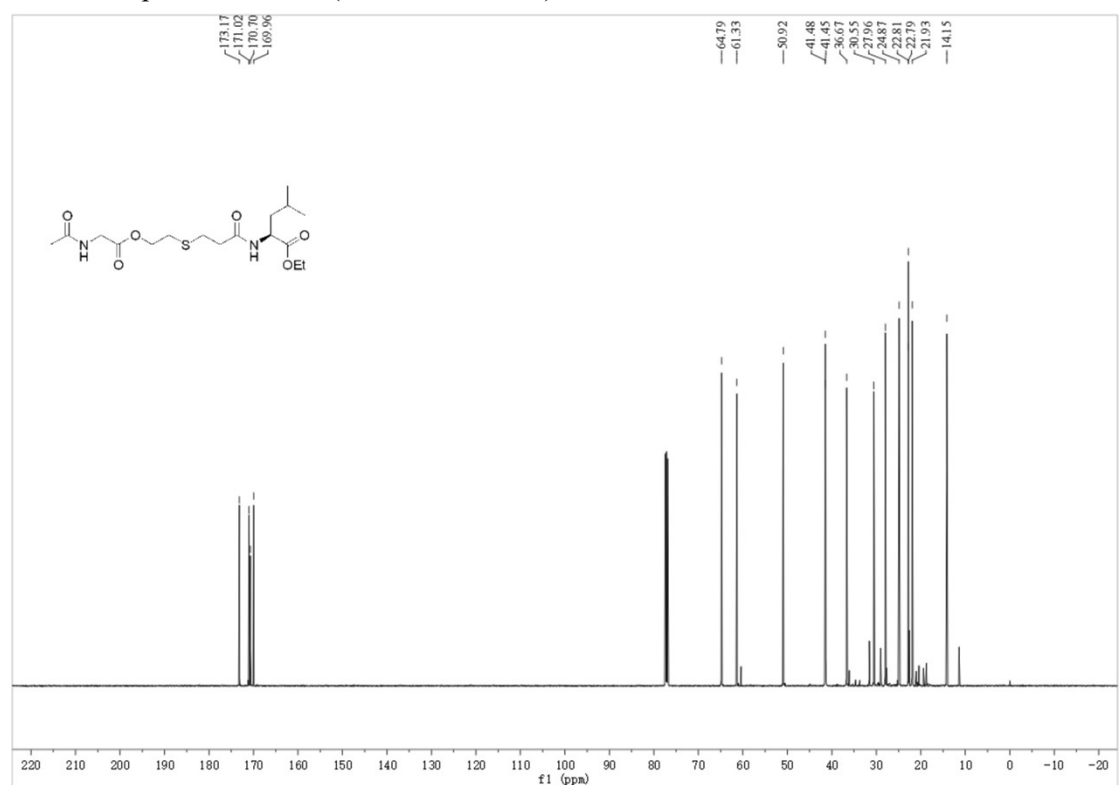

<sup>1</sup>H NMR spectrum of **1a1** (CDCl<sub>3</sub>, 500 MHz)

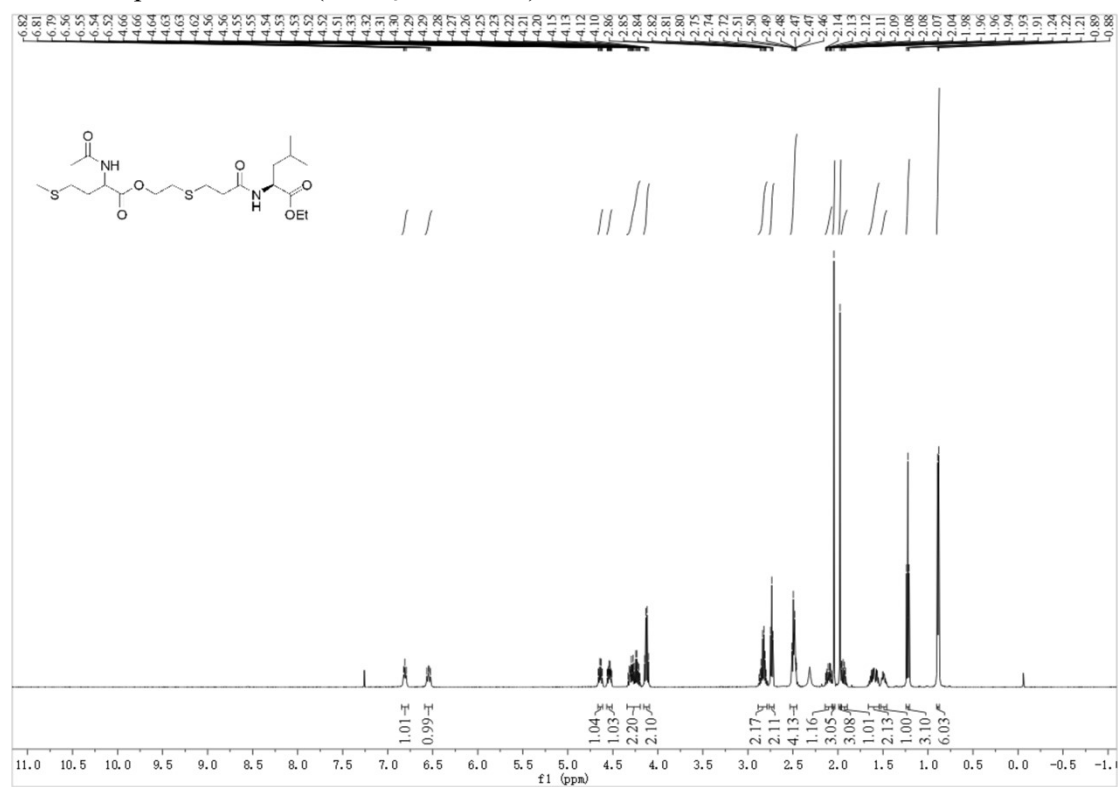

<sup>13</sup>C NMR spectrum of **1a1** (CDCl<sub>3</sub>, 126 MHz)

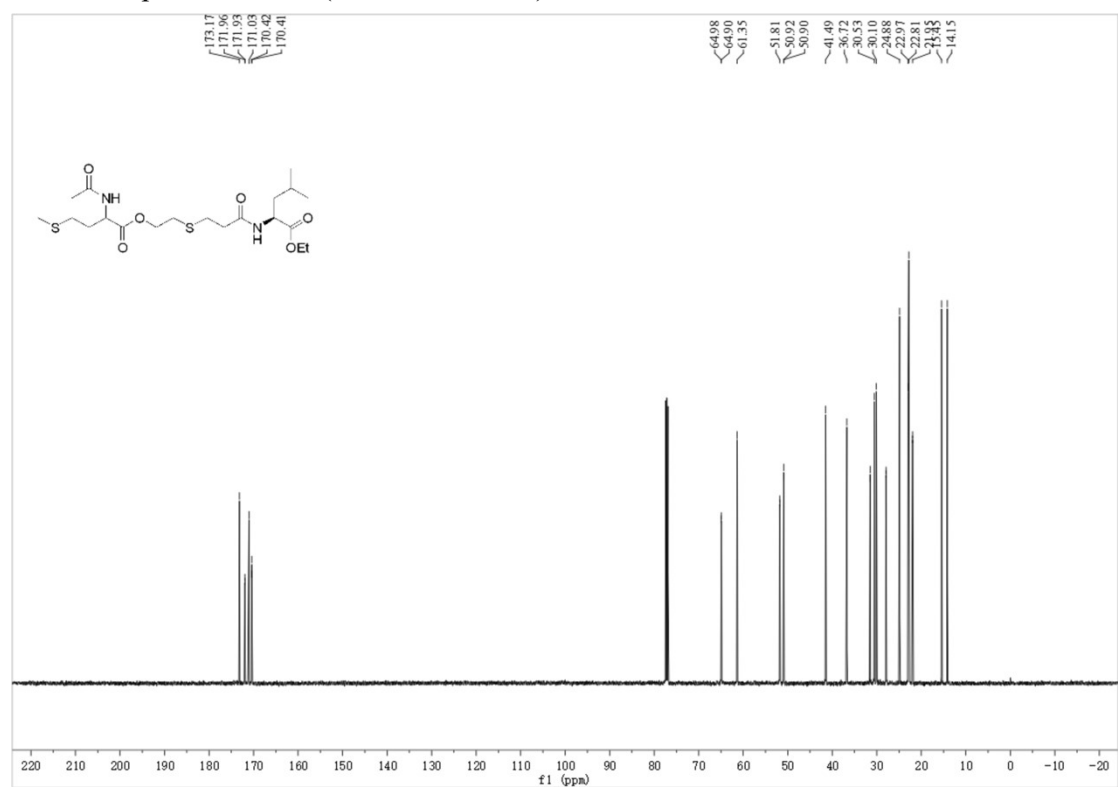

$^1\text{H}$  NMR spectrum of **1am** ( $\text{CDCl}_3$ , 500 MHz)

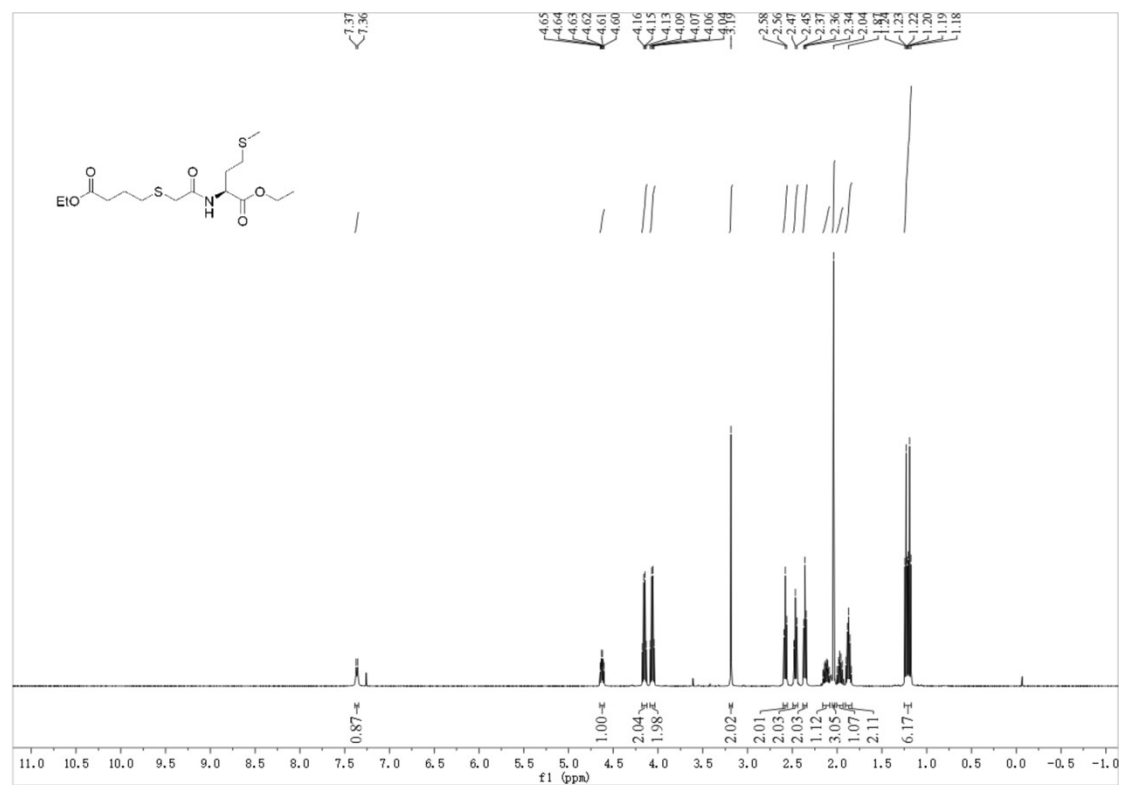

$^{13}\text{C}$  NMR spectrum of **1am** ( $\text{CDCl}_3$ , 126 MHz)

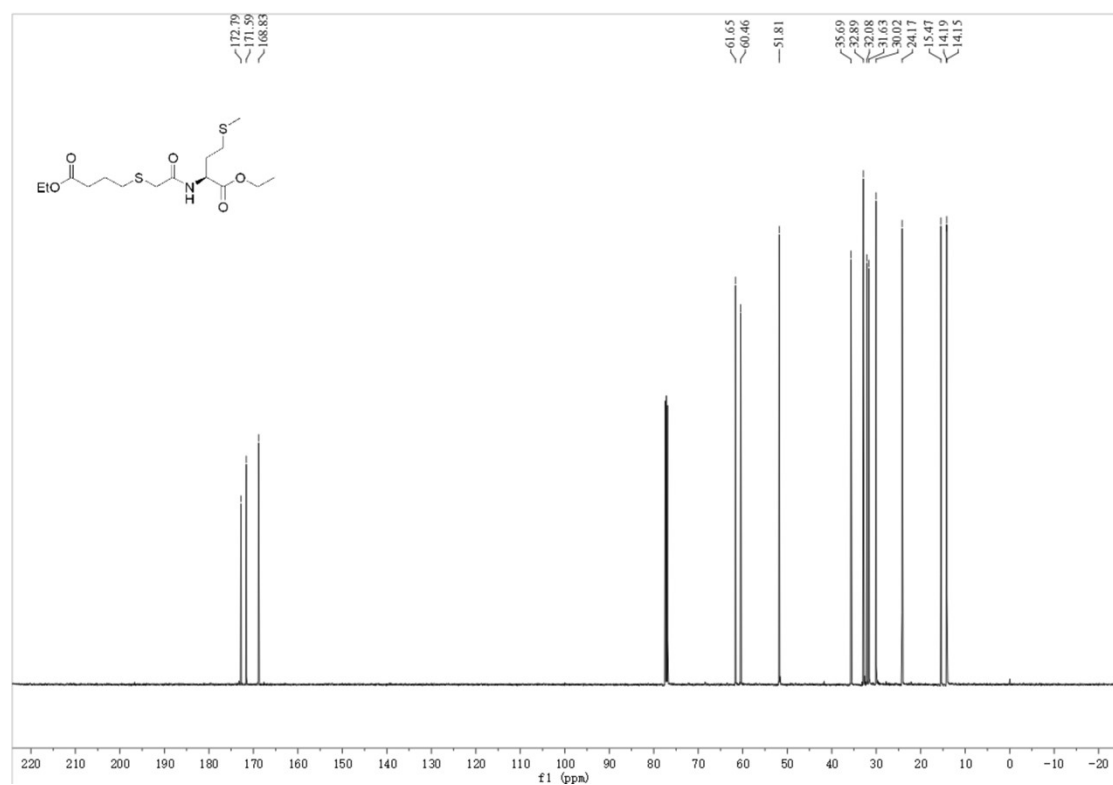

Supplement: d6cc02357f1.pdf [file d6cc02357f1.pdf]
